# Supplementary material for: A B-cell receptor-related gene signature predicts survival in mantle cell lymphoma: results from the Fondazione Italiana Linfomi MCL-0208 trial
Source: PubMed Central journal article supplement — Haematologica. 2018 Feb 22;103(5):849–56. doi: 10.3324/haematol.2017.184325 (PMC5927985; doi:10.3324/haematol.2017.184325), 2018-05
Supplement: 2017.184325.BOMBEN_SUPPL.pdf [file 2017.184325.BOMBEN_SUPPL.pdf]

## A B-cell receptor-related gene signature predicts survival in mantle cell lymphoma: results from the Fondazione Italiana Linfomi MCL-0208 trial

Riccardo Bomben,<sup>1\*</sup> Simone Ferrero,<sup>2,3\*</sup> Tiziana D'Agaro,<sup>1</sup> Michele Dal Bo,<sup>1</sup> Alessandro Re,<sup>4</sup> Andrea Evangelista,<sup>5</sup> Angelo Michele Carella,<sup>6</sup> Alberto Zamò,<sup>7</sup> Umberto Vitolo,<sup>8</sup> Paola Omedè,<sup>3</sup> Chiara Rusconi,<sup>9</sup> Luca Arcaini,<sup>10</sup> Luigi Rigacci,<sup>11</sup> Stefano Luminari,<sup>12,13</sup> Andrea Piccin,<sup>14</sup> Delong Liu,<sup>15</sup> Adrian Wiestner,<sup>15</sup> Gianluca Gaidano,<sup>16</sup> Sergio Cortelazzo,<sup>17</sup> Marco Ladetto<sup>2,18</sup> and Valter Gattei<sup>1\*\*</sup>

<sup>1</sup>Clinical and Experimental Onco-Hematology Unit, Centro di Riferimento Oncologico, IRCCS, Aviano (PN), Italy; <sup>2</sup>Department of Molecular Biotechnologies and Health Sciences, Hematology Division 1, University of Torino, Italy; <sup>3</sup>Hematology Division 1, AOU "Città della Salute e della Scienza di Torino" University-Hospital, Italy; <sup>4</sup>Hematology, AO "Spedali Civili di Brescia", Italy; <sup>5</sup>Unit of Cancer Epidemiology, AOU "Città della Salute e della Scienza di Torino" University-Hospital, Italy; <sup>6</sup>Hematology Division 1, IRCCS AOU San Martino IST, Genova, Italy; <sup>7</sup>Department of Diagnostics and Public Health, University of Verona, Italy; <sup>8</sup>Hematology Division 1, AOU "Città della Salute e della Scienza di Torino" University-Hospital, Italy; <sup>9</sup>Hematology Division, "Niguarda Ca' Granda" Hospital, Milano, Italy; <sup>10</sup>Hematology Division, Department of Molecular Medicine, IRCCS Fondazione San Matteo, Pavia, Italy; <sup>11</sup>Hematology Division, AOU "Careggi", University of Firenze, Italy; <sup>12</sup>Hematology, Azienda Sanitaria Locale IRCCS, Reggio Emilia, Italy; <sup>13</sup>Department of Diagnostic, Clinical and Public Health Medicine, University of Modena and Reggio Emilia, Reggio Emilia, Italy; <sup>14</sup>Department of Hematology and BMT Unit, Bolzano/Bozen Regional Hospital, Italy; <sup>15</sup>Hematology Branch, National Heart, Lung, and Blood Institute, NIH, Bethesda, MD, USA; <sup>16</sup>Division of Haematology, Department of Translational Medicine –University of Eastern Piedmont, Novara, Italy; <sup>17</sup>Hematology, Medical Oncology and Hematology Division, "Istituto Clinico Humanitas Gavazzeni", Bergamo, Italy and <sup>18</sup>SC Ematologia Azienda Ospedaliera Nazionale SS. Antonio e Biagio e Cesare Arrigo, Alessandria, Italy

*\*RB and SF contributed equally to this work as first authors: \*\*ML and VG contributed equally to this work as senior authors*

©2018 Ferrara Storti Foundation. This is an open-access paper. doi:10.3324/haematol.2017.184325

Received: November 10, 2017.

Accepted: February 14, 2018.

Pre-published: February 22, 2018.

Correspondence: rbomben@cro.it

## **A B-cell receptor-related gene signature predicts survival in Mantle Cell Lymphoma: results from the FIL-MCL-0208 trial**

- **Supplemental Methods**
  
- **Supplemental Figure Legends**
  
- **Supplemental Figures:**
  - **Figure S1. Cases entering the study.**
  - **Figure S2. Flowchart describing the Fondazione Italiana Linfomi (FIL)-MCL-0208 randomized Italian clinical trial.**
  - **Figure S3. Analysis of the 6-gene signature using array and qRT-PCR values.**
  - **Figure S4. BCR and biological parameters.**
  - **Figure S5. Correlation between qRT-PCR calculated on PB and FFPE MCL samples.**
  - **Figure S6. Validation of BCR signature in an external cohort.**
  - **Figure S7. Validation with an external signature.**
  - **Figure S8. Validation with an external signature.**
  - **Figure S9. Reproducibility of RNA extraction and qRT-PCR methods.**
  
- **Supplemental Tables:**
  - **Table S1. Features of the study population.**
  - **Table S2. BCR categorization according to GEP or qRT-PCR experiments.**
  - **Table S3. Differentially expressed genes between BCR<sup>low</sup> and BCR<sup>high</sup> MCL cells.**
  - **Table S4. Pathway and GO categories differentially represented in BCR<sup>low</sup> and BCR<sup>high</sup> MCL cells.**
  - **Table S5. Gene Set upregulated in BCR<sup>high</sup> MCL cells respect to BCR<sup>low</sup> MCL cells according to Gene Set Enrichment Analysis (GSEA).**
  - **Table S6. qRT-PCR details.**

## **Methods**

### **RNA extraction and GEP**

The purity of purified clonal CD5<sup>+</sup>/CD19<sup>+</sup> MCL cells, using a cell sorting FACS Aria III (BD Biosciences, Franklin Lakes, NJ), always exceeded 95%. Total RNA was extracted using the TRIZOL Reagent (Thermo Fisher Scientific) according to protocol. In the case of FFPE MCL samples, RNA extraction was performed strictly following the RecoverAll Total Nucleic Acid Isolation Kit for FFPE (Thermo Fisher Scientific) instructions. RNA was checked using the Agilent 2100 Bioanalyzer (Agilent Technologies, Santa Clara, CA), as reported previously.<sup>1-4</sup>

### **GEP and data mining tools**

GEP was performed with 150 ng total RNA labeled with Cyanine(Cy)-3 dye.<sup>1,2</sup> Cy3-labeled RNA was hybridized to the Whole Human Genome (8x60) oligo microarray (Agilent Technologies) and analyzed with an Agilent Microarray Scanner (Agilent Technologies) and with the Agilent Feature Extraction Software 10.7.3 (Agilent Technologies), as reported previously.<sup>1-4</sup> Microarray data are available in Gene Expression Omnibus (<http://www.ncbi.nlm.nih.gov/geo/>) under accession number GSE89447.

### **Gene Expression Profiling (GEP) data mining tools**

GEP data were analyzed using the GeneSpring GX 12.7 software (Agilent Technologies, Santa Clara, CA); pre-processing and pre-filtering steps were carried out according to Agilent instruction. To identify the differentially expressed genes, t statistic was applied and P values were then adjusted for multiple testing with Benjamini and Hochberg's method to control the false discovery rate. Differentially expressed genes were identified according to an adjusted P value  $\leq 0.01$  and a fold change at least equal to 3. GEP results were visualized using the Cluster and Tree View programs (Eisen Laboratory, Stanford University).<sup>5</sup> The biological functions of genes were investigated using Onto-Tools.<sup>3</sup> Significant gene ontology pathways differentially expressed were selected for having a P value of at least 0.05, and containing at least five genes per category. Gene Set Enrichment Analysis (GSEA)<sup>1,2,4,6</sup> was used to identify the putative genes sets involved in gene deregulation from the online database available at the GSEA Web site

(<http://www.broadinstitute.org/gsea/>). Enriched or over-represented genes sets between BCR<sup>low</sup> and BCR<sup>high</sup> MCL samples were identified using 1 000 permutations of the phenotype labels. Venn diagram was constructed using genes belonging to the different gene sets related to B-Cell Receptor (BCR) pathway and having a significant enrichment score after conversion into Agilent probes and merged with probes differentially expressed with an adjusted P value  $\leq 0.01$  and a fold change at least equal to 3.

### **Quantitative real-time PCR (qRT-PCR)**

First strand cDNA synthesis was performed by using ImProm-II Reverse Transcription System (Promega) following the manufacturer's instructions, using 150 ng of RNA with 0.5 ug/reaction of Random primers. Expression of specific genes was evaluated with the Gene Expression assay kit (Integrated DNA Technologies, Coralville, IA) using 1 x FastStart Universal Probe Master Mix ROX (ROCHE).<sup>1,2</sup> All qRT-PCR experiments were performed on a Bio-Rad CFX96 (Bio-Rad Laboratories, Hercules, CA). Thermocycling was performed as follow: 95°C for 10 min; 40 cycles of 95°C for 15 s, 60°C for 1 min. The relative amount of each gene was computed using the equation  $2^{-\Delta Ct}$ , where  $\Delta Ct = (Ct_{gene} - Ct_{\beta 2M})$ . Fold-change between classes was calculated as reported.<sup>1,2</sup> Amplification efficiency for each probe was calculated with a standard curve generated using a cDNA from a cell line. Four different 10 fold dilutions were used to construct the relative standard curves. For each qRT-PCR assays a  $R^2 > 0.98$  and a slope between -3.28 and -3.39 was observed. For details related to primer and probe sequences, amplicon length and efficiency see Table S6.

In order to test the reproducibility for RNA isolation and qRT-PCR experiments, we isolated RNA material from four different samples in triplicate, and we tested the reproducibility of each qRT-PCR assay. A minimum variation among the mean of each replicate related to a single assay was observed (Figure S9A). Accordingly, the relative amount of each gene, normalized as above described, presented minimum variation (Figure S9B).

### **Generation of Prediction Model**

We used the Decision Tree (DT) model implemented by GeneSpringGX 12.7 (Agilent Technologies). Briefly, the goal of DT model is to create a model that predicts as outcome the class

to which the data belongs. GeneSpring implements Axis Parallel Decision Trees where decisions at each step are made using one single feature of the many features present. The decision points in a decision tree are called internal nodes. A sample gets classified by following the appropriate path down the decision tree. All samples which follow the same path down the tree are said to be at the same leaf. The tree building process continues until each leaf has purity above a certain specified threshold, i.e., of all samples which are associated with this leaf, at least a certain fraction comes from one class. Once the tree building process is done, a pruning process is used to prune off portions of the tree to reduce chances of over-fitting.

Prediction models were built based on the expression profile of the 6-gene signature (*AKT3*, *BCL-2*, *BTK*, *CD79b*, *PIK3CD*, *SYK*) of conditions BCR<sup>low</sup> and BCR<sup>high</sup>. The input data set is divided into a training dataset (17 samples) and a validation dataset (10 samples) as reported in Fig. 2D-E and Table S2. As parameter we selected pessimistic error for pruning methods, Gini functions, Global allowable leaf impurity percentage, and N-Fold cross validation with 10 fold and 100 repeats.

In the case of qRT-PCR values on FFPE samples, being hierarchical cluster again able to split samples in two different group resembling BCR<sup>low</sup> (low expression of the 6-gene signature) and BCR<sup>high</sup> (high expression of the 6-gene signature) categories, we decided to use 16 samples with low or high expression of the 6-gene signature as training dataset for the construction of DT model based (see Table S2 for training samples). Accordingly to this model we assigned each FFPE MCL samples to a different BCR category as reported in Table S2.

## References

- 1 Bomben R, Gobessi S, Dal BM et al. The miR-17-92 family regulates the response to Toll-like receptor 9 triggering of CLL cells with unmutated IGHV genes. *Leukemia*. 2012;26(7):1584-1593.
- 2 Dal BM, D'Agaro T, Gobessi S et al. The SIRT1/TP53 axis is activated upon B-cell receptor triggering via miR-132 up-regulation in chronic lymphocytic leukemia cells. *Oncotarget*. 2015;6(22):19102-19117.
- 3 Draghici S, Khatri P, Martins RP, Ostermeier GC, Krawetz SA. Global functional profiling of gene expression. *Genomics*. 2003;81(2):98-104.
- 4 Subramanian A, Tamayo P, Mootha VK et al. Gene set enrichment analysis: a knowledge-based approach for interpreting genome-wide expression profiles. *Proc Natl Acad Sci U S A*. 2005;102(43):15545-15550.
- 5 Eisen MB, Spellman PT, Brown PO, Botstein D. Cluster analysis and display of genome-wide expression patterns. *Proc Natl Acad Sci U S A*. 1998;95):14863-8.
- 6 Mootha VK, Lindgren CM, Eriksson KF et al. PGC-1alpha-responsive genes involved in oxidative phosphorylation are coordinately downregulated in human diabetes. *Nat Genet*. 2003;34(3):267-273.
- 7 Saba NS, Liu D, Herman SE et al. Pathogenic role of B-cell receptor signaling and canonical NF-kappaB activation in mantle cell lymphoma. *Blood*. 2016;128(1):82-92.

## Figure legends

**Figure S1. Cases entering the study.** A) Kaplan-Meier curves obtained by comparing PFS intervals of 83 MCL cases entering the biological study (median PFS not reached) with 218 MCL cases not entering the biological study (median PFS 57.9 months). B) Kaplan-Meier curves obtained by comparing OS intervals of 83 MCL cases entering the biological study (median OS not reached) with 218 MCL cases not entering the biological study (median OS not reached). The number of patients included in each group is reported under relative categories; the reported P value refers to log-rank test.

**Figure S2. Flowchart describing the Fondazione Italiana Linfomi (FIL)-MCL-0208 randomized Italian clinical trial.**

**Figure S3. Analysis of the 6-gene signature using array and qRT-PCR values.** Correlation between GEP and qRT-PCR. Log<sub>2</sub> ratios of array data are plotted in comparison with log<sub>2</sub> of 2- $\Delta$ Ct values obtained from qRT-PCR Gene Expression Assays (Integrated DNA Technologies, Coralville, IA).  $\beta$ 2M was used as housekeeping gene. The reported P and R<sup>2</sup> values refer to correlation test.

**Figure S4. BCR and biological parameters.** A) Correlation between BCR categories and IGHV mutational status. P values indicate  $\chi^2$  test. B) Levels of lactic dehydrogenase (LDH). Box plots display levels of LDH in 21 BCR<sup>low</sup> MCL cases (273.9 $\pm$ 113.4) and 21 BCR<sup>high</sup> MCL cases (398.6 $\pm$ 186.3). P value indicates Mann-Whitney test.

**Figure S5. Correlation between qRT-PCR calculated on PB and FFPE MCL samples.** Graph lines reporting the normalized qRT-PCR values calculated on PB or LN specimens for each samples. Blue line refers to PB samples; red line refers to LN samples. The reported Ic values refer to interclass correlation coefficient.

**Figure S6. Validation of BCR signature in an external cohort.** Validation of the 6-gene BCR signature in an external cohort. Probabilities of PFS were evaluated in a validation cohort of 34 MCL cases., as reported by Saba et al.<sup>7</sup> The separation of the 34 patients into 9 BCR<sup>high</sup> and 25 BCR<sup>low</sup> according to the sum of the expression of the 6 genes, as obtained by GEP data, was based on statistical analyses computing the optimal cutoff point, i.e. the lowest P-value. The number of patients in each group is reported; P value refers to log-rank test.

**Figure S7. Validation with external signature.** Hierarchical clustering of 14 BCR<sup>low</sup> cases (blue bar under the horizontal dendrogram) and 13 BCR<sup>high</sup> cases (red bar under the horizontal dendrogram), using the BCR signature retrieved by Saba et al., is shown. The reported P value refers to log-rank test. B) Levels of BCR activation according to Saba et al. Box plots display levels of BCR activation in 14 BCR<sup>low</sup> MCL cases and 13 BCR<sup>high</sup> MCL cases. P value indicates Mann-Whitney test.

**Figure S8. Validation with external signature.** A) Hierarchical clustering of 14 BCR<sup>low</sup> cases (blue bar under the horizontal dendrogram) and 13 BCR<sup>high</sup> cases (red bar under the horizontal dendrogram) using the BCR signature retrieved by Scott et al., is shown. Color codes for gene expression values refer to mean centered log-ratio values. B) Kaplan-Meier curves obtained by comparing PFS intervals of 13 Group 1 MCL cases (median PFS not reached), with 7 Group 2 MCL cases (median PFS 49.3 months), with 7 Group 3 MCL cases (median PFS 9.1 months). C) Kaplan-Meier curves obtained by comparing OS intervals of 13 Group 1 MCL cases (median OS not reached), with 7 Group 2 MCL cases (median OS not reached), with 7 Group 3 MCL cases (median OS 16.4 months). The number of patients included in each group is reported under relative categories; the reported P value refers to log-rank test.

**Figure S9. Reproducibility of RNA extraction and qRT-PCR methods.** A) Bars reported the Ct value for each gene belonging to 6-gene signature. B) Bars reported the normalized value for each gene belonging to 6-gene signature. In all graphs data represent mean  $\pm$  standard deviation of three replicates for each sample.



Figure S1

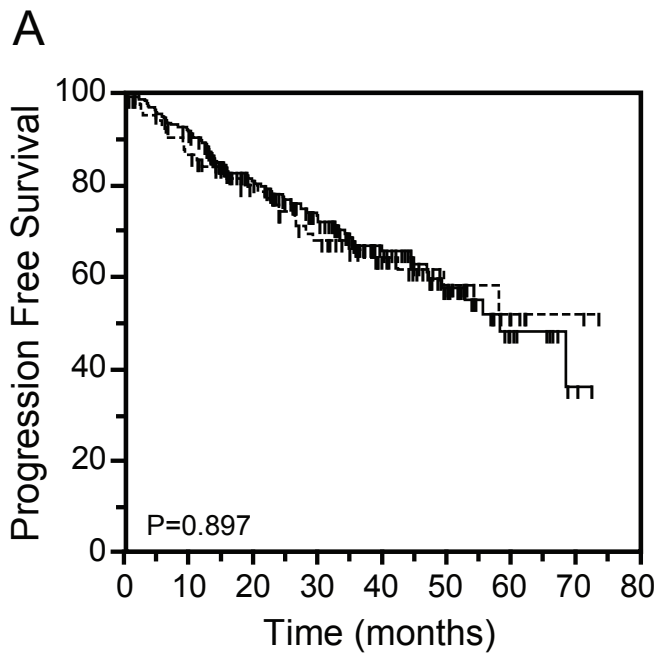

Number at risk

|                                     |         |     |    |    |   |
|-------------------------------------|---------|-----|----|----|---|
| Group: cases not entering the study | —       |     |    |    |   |
|                                     | 218     | 139 | 56 | 10 | 0 |
| Group: cases entering the study     | - - - - |     |    |    |   |
|                                     | 83      | 55  | 29 | 5  | 0 |

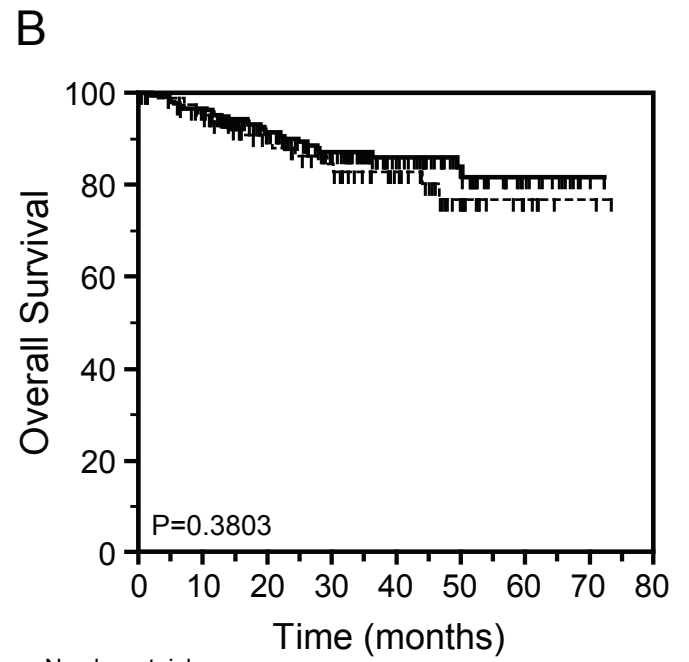

Number at risk

|                                     |         |     |    |    |   |
|-------------------------------------|---------|-----|----|----|---|
| Group: cases not entering the study | —       |     |    |    |   |
|                                     | 218     | 154 | 67 | 15 | 0 |
| Group: cases entering the study     | - - - - |     |    |    |   |
|                                     | 83      | 60  | 35 | 6  | 0 |

Figure S2

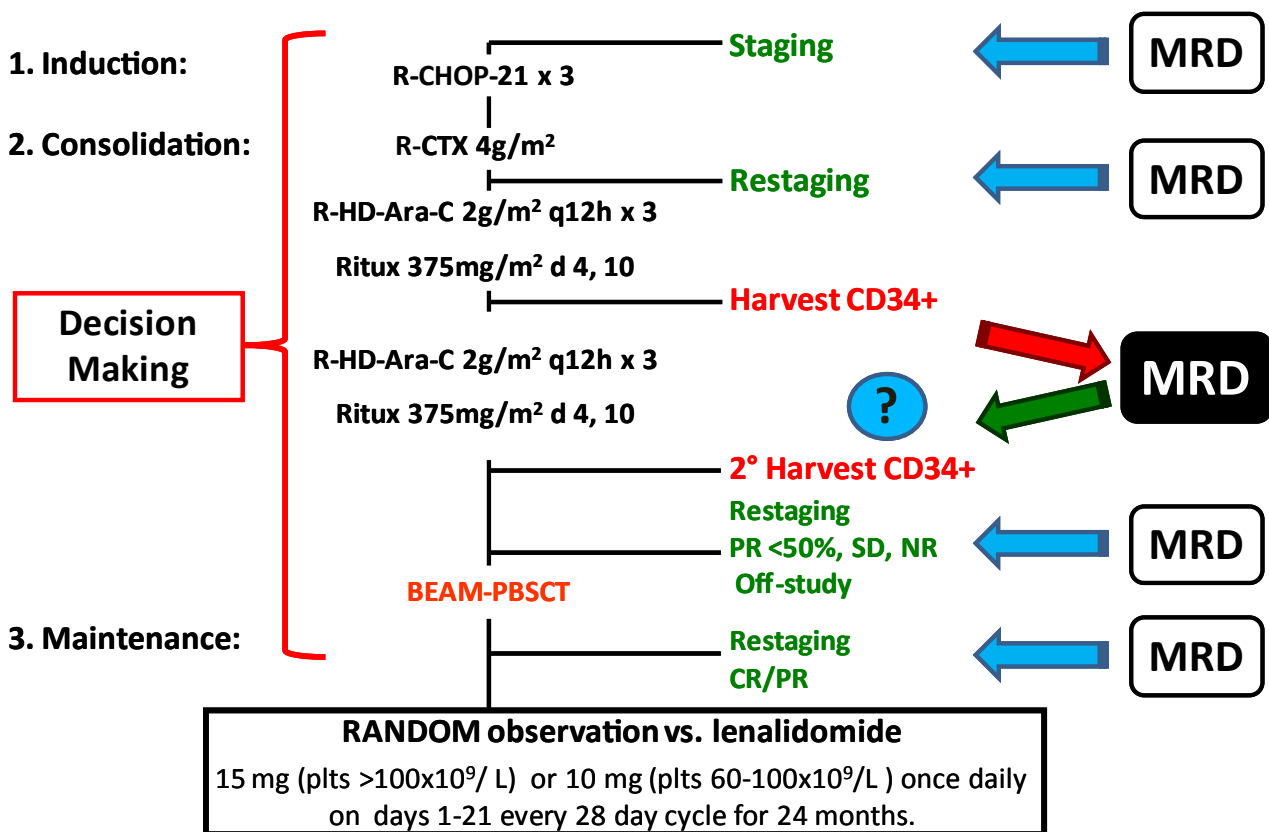

Figure S3

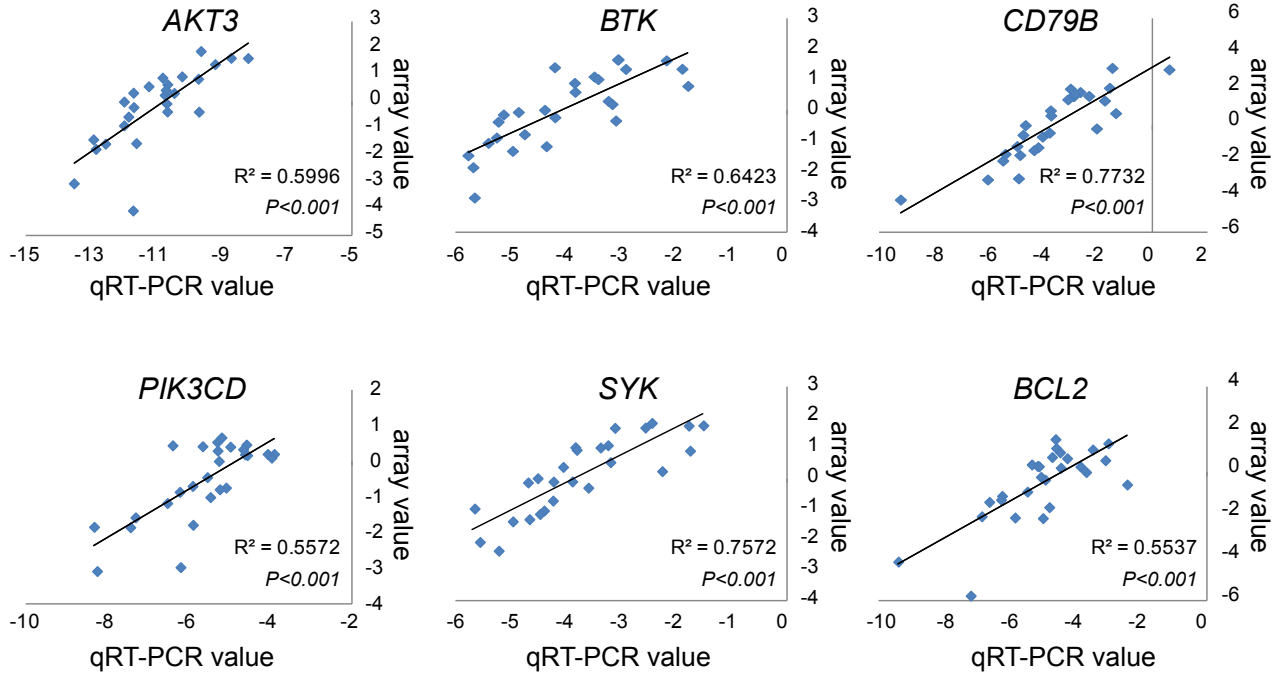

Figure S4

A

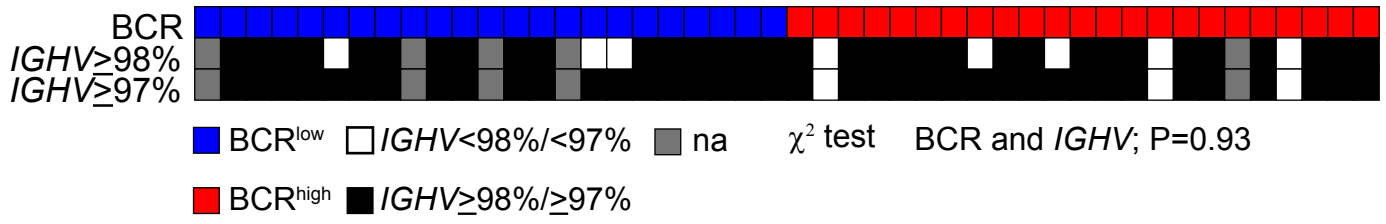

B

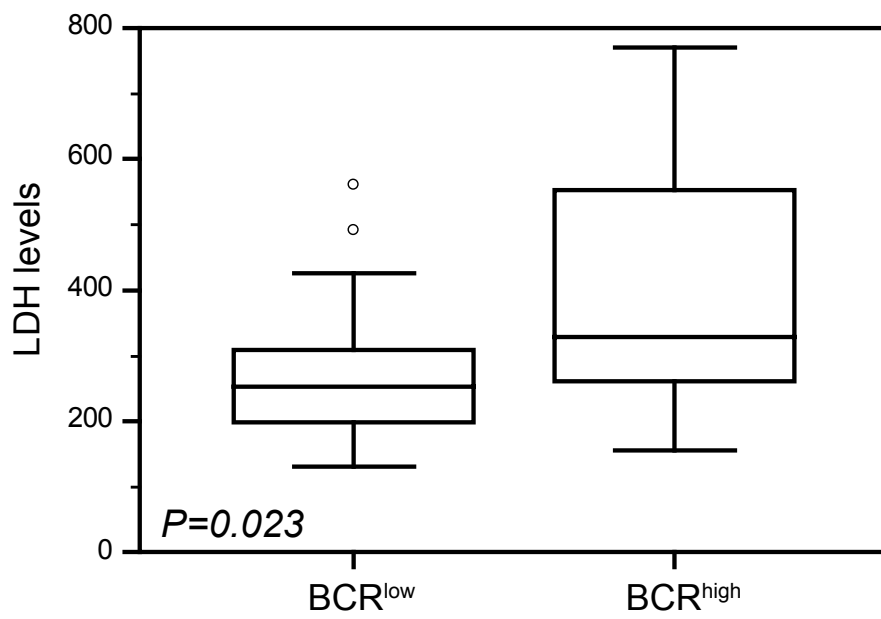

Figure S5

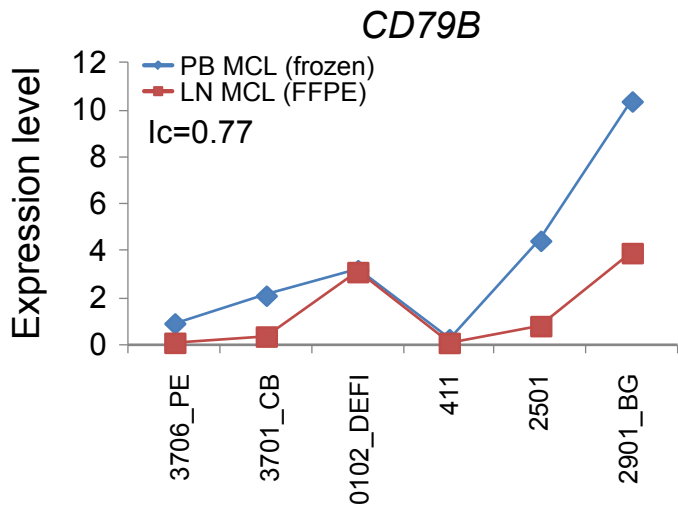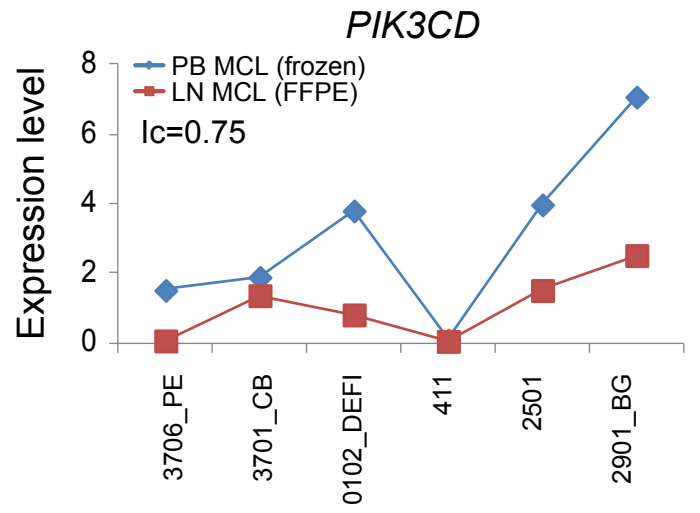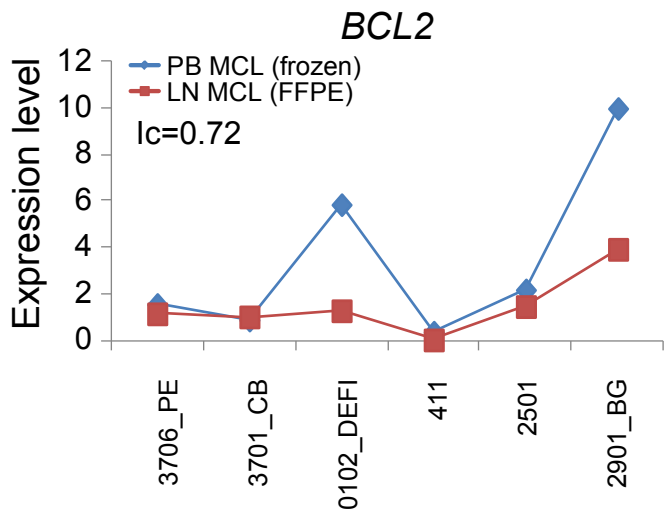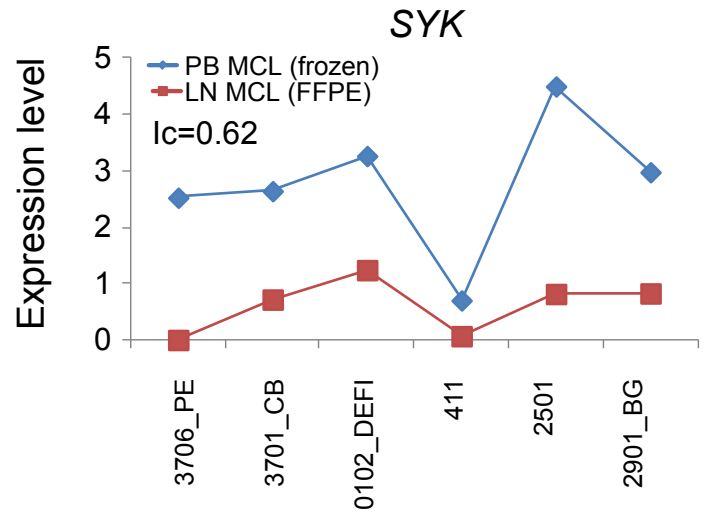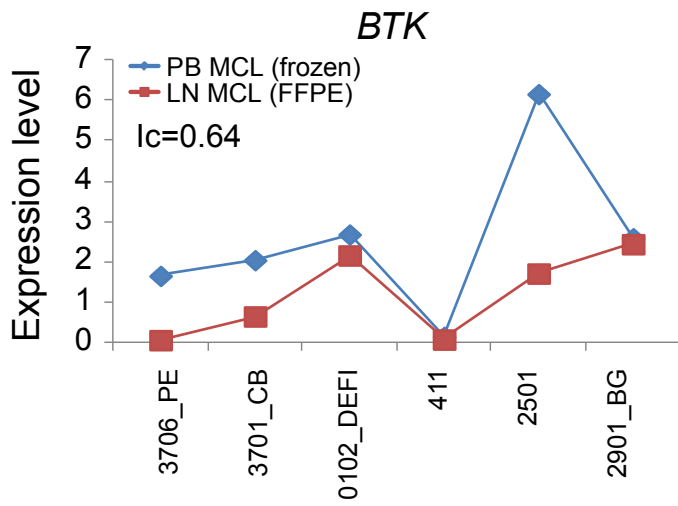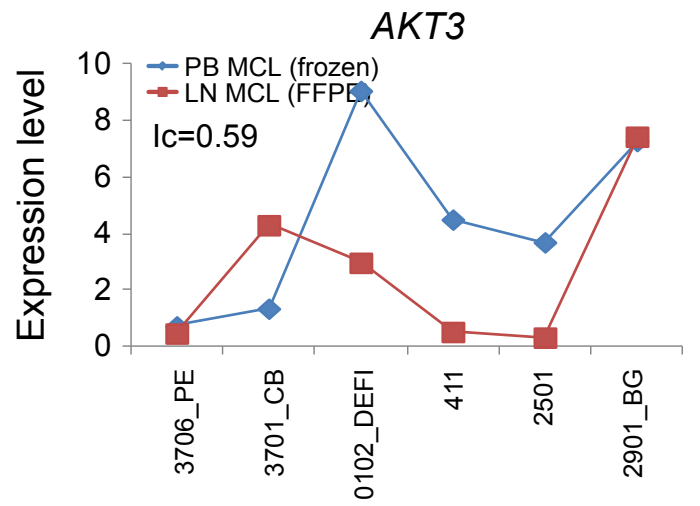

Figure S6

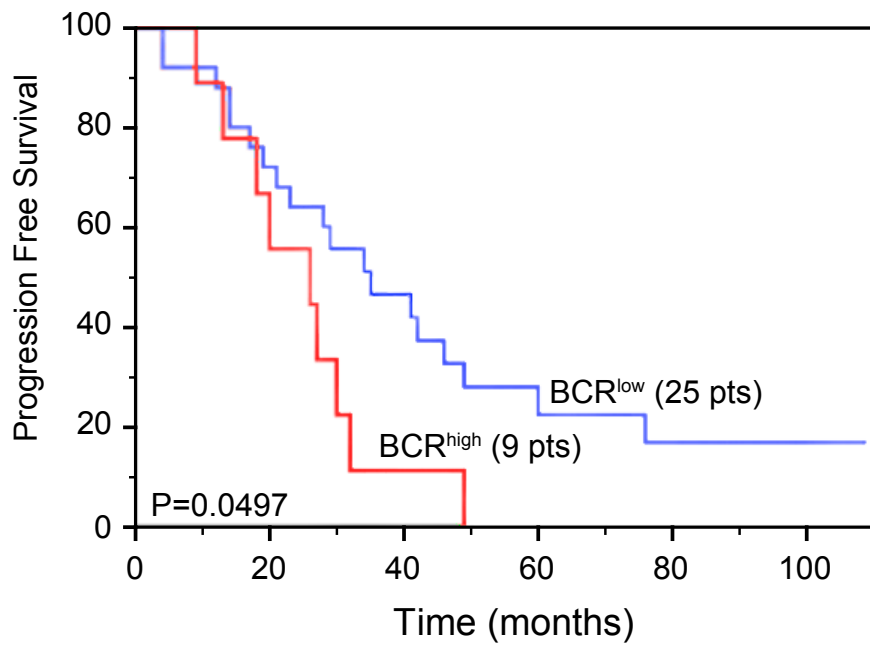

Figure S7

A

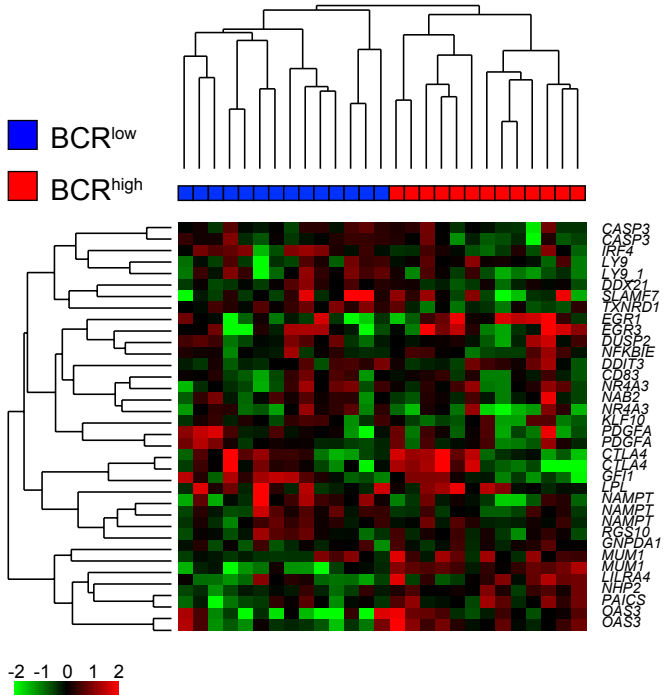

B

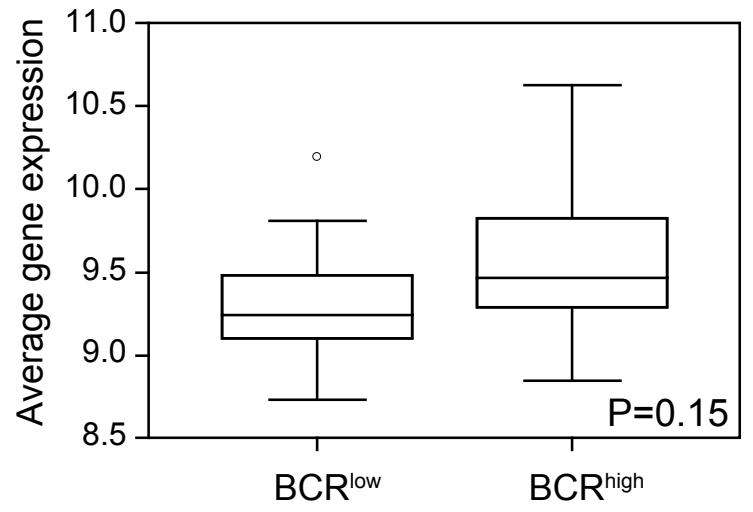

Figure S8

A

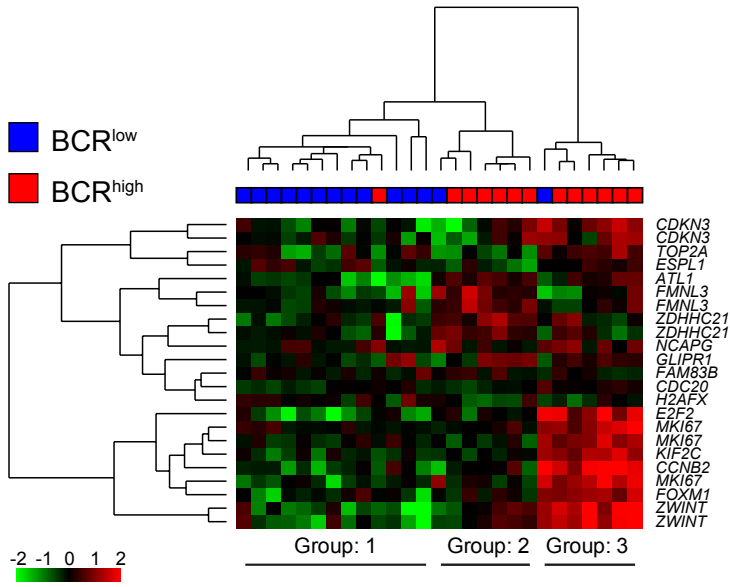

B

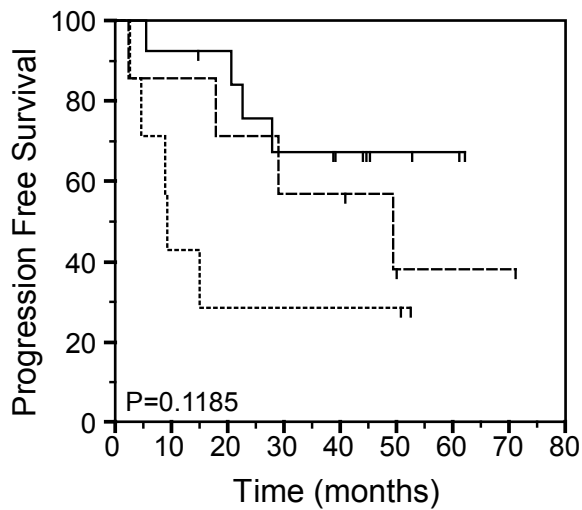

| Number at risk |           | 1 vs 2 P=0.4182 |    |   |   |   |
|----------------|-----------|-----------------|----|---|---|---|
| Group: 1       | —         | 13              | 11 | 6 | 2 | 0 |
| Group: 2       | - - -     | 7               | 5  | 4 | 1 | 0 |
| Group: 3       | · · · · · | 7               | 2  | 2 | 0 | 0 |
|                |           | 2 vs 3 P=0.3547 |    |   |   |   |
|                |           | 1 vs 3 P=0.0283 |    |   |   |   |

C

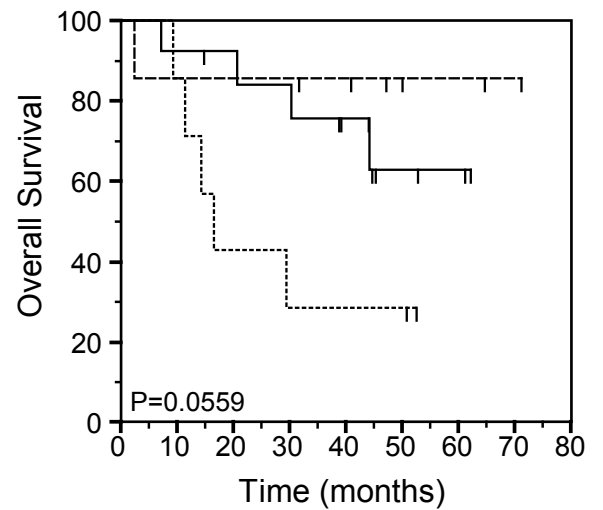

| Number at risk |           | 1 vs 2 P=0.4585 |    |   |   |   |
|----------------|-----------|-----------------|----|---|---|---|
| Group: 1       | —         | 13              | 11 | 7 | 2 | 0 |
| Group: 2       | - - -     | 7               | 6  | 5 | 2 | 0 |
| Group: 3       | · · · · · | 7               | 3  | 2 | 0 | 0 |
|                |           | 2 vs 3 P=0.0598 |    |   |   |   |
|                |           | 1 vs 3 P=0.0568 |    |   |   |   |



Figure S9

A

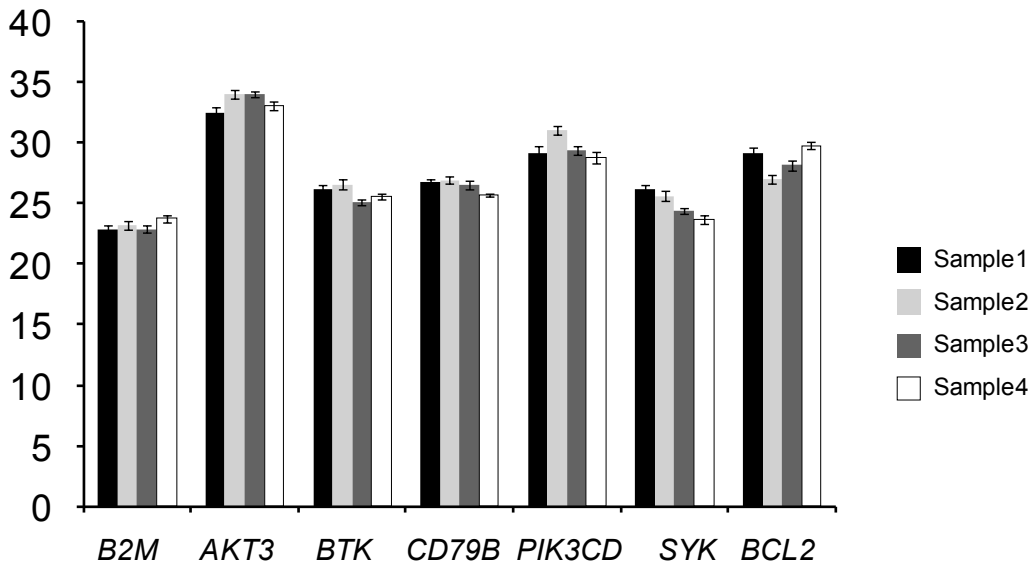

B

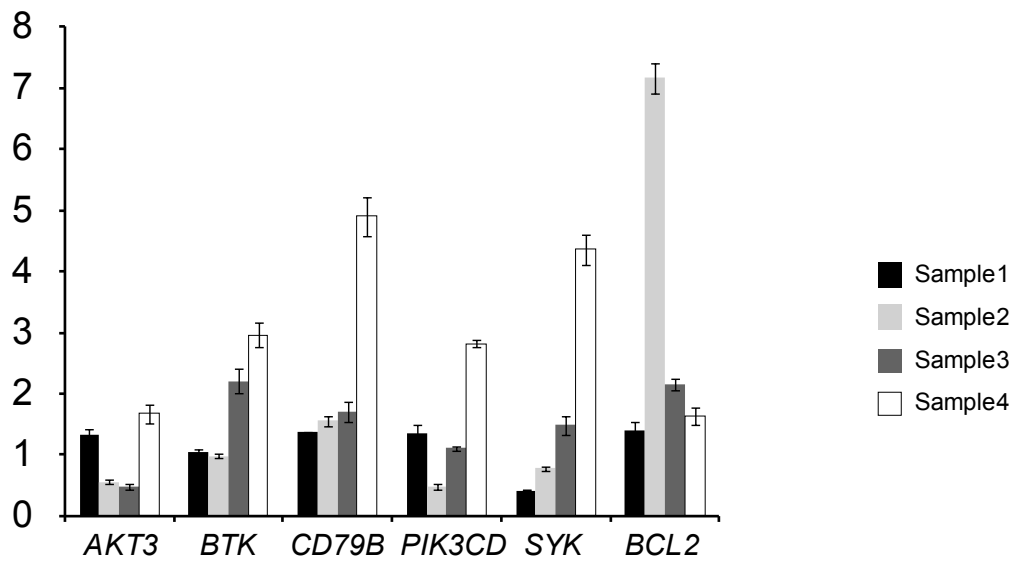

**Table S1. Features of the study population**

|                                               | <b>Cases entering the study</b> | <b>Cases not entering the study</b> | <b>p value</b> |
|-----------------------------------------------|---------------------------------|-------------------------------------|----------------|
| <b>N. of cases</b>                            | 83                              | 217                                 |                |
| <b>Median age, years</b>                      | 54.3                            | 55.9                                | ns             |
| <b>Male</b>                                   | 70%                             | 81%                                 | 0.041          |
| <b>Stage IV</b>                               | 99%                             | 92%                                 | ns             |
| <b>MIPI (n=83/n=217)</b>                      |                                 |                                     |                |
| <b>Low</b>                                    | 47%                             | 58%                                 |                |
| <b>Intermediate</b>                           | 35%                             | 28%                                 | ns             |
| <b>High</b>                                   | 18%                             | 14%                                 |                |
| <b>Ki67 <math>\geq</math>30% (n=70/n=167)</b> | 43%                             | 52%                                 | ns             |
| <b>Follow-up, years</b>                       | 3.1                             | 2.8                                 | ns             |
| <b>2-years PFS</b>                            | 78%                             | 74%                                 | ns             |

Abbreviation: ns, not significant ( $p < 0.05$ ); MIPI, Mantle Cell Lymphoma International Prognostic Index; PFS, progression free survival.

Table S2. BCR categorization

| Sample | Sex    | Starting Material | Training/ Validation dataset on PB | Training/ Validation dataset on FFPE | BCR category | Classification according to DT model on PB samples | Classification according to DT model on FFPE samples | IGHV UM/M | LDH Abnormal | Ki67 2 groups |
|--------|--------|-------------------|------------------------------------|--------------------------------------|--------------|----------------------------------------------------|------------------------------------------------------|-----------|--------------|---------------|
| 101    | Female | LN                |                                    |                                      | BCRhigh      |                                                    | BCRhigh                                              | M         | No           | 0             |
| 104    | Male   | LN                |                                    | T                                    | BCRlow       |                                                    | BCRlow                                               | nd        | na           | 0             |
| 106    | Male   | LN                |                                    |                                      | BCRhigh      |                                                    | BCRhigh                                              | UM        | Yes          | 2             |
| 401    | Male   | LN                |                                    |                                      | BCRhigh      |                                                    | BCRhigh                                              | UM        | No           | 0             |
| 402    | Male   | LN                |                                    | T                                    | BCRlow       |                                                    | BCRlow                                               | M         | No           | 0             |
| 405    | Male   | LN                |                                    | T                                    | BCRhigh      |                                                    | BCRhigh                                              | UM        | No           | 0             |
| 406    | Male   | LN                |                                    | T                                    | BCRhigh      |                                                    | BCRhigh                                              | nd        | No           | 0             |
| 413    | Male   | LN                |                                    | T                                    | BCRhigh      |                                                    | BCRhigh                                              | UM        | Yes          | 2             |
| 417    | Male   | LN                |                                    |                                      | BCRlow       |                                                    | BCRlow                                               | M         | Yes          | 0             |
| 418    | Male   | LN                |                                    |                                      | BCRlow       |                                                    | BCRlow                                               | nd        | No           | 0             |
| 420    | Male   | LN                |                                    | T                                    | BCRlow       |                                                    | BCRlow                                               | M         | Yes          | 2             |
| 509    | Male   | LN                |                                    |                                      | BCRlow       |                                                    | BCRlow                                               | UM        | Yes          | 2             |
| 514    | Female | LN                |                                    |                                      | BCRlow       |                                                    | BCRlow                                               | UM        | No           | 2             |
| 518    | Male   | LN                |                                    |                                      | BCRlow       |                                                    | BCRlow                                               | UM        | No           | 2             |
| 521    | Male   | LN                |                                    | T                                    | BCRlow       |                                                    | BCRlow                                               | nd        | na           | 2             |
| 1002   | Male   | LN                |                                    | T                                    | BCRhigh      |                                                    | BCRhigh                                              | nd        | No           | 0             |
| 1102   | Female | LN                |                                    |                                      | BCRhigh      |                                                    | BCRhigh                                              | UM        | No           | 0             |
| 1305   | Female | LN                |                                    | T                                    | BCRhigh      |                                                    | BCRhigh                                              | UM        | Yes          | 0             |
| 1308   | Female | LN                |                                    | T                                    | BCRhigh      |                                                    | BCRhigh                                              | UM        | No           | 2             |
| 1403   | Male   | LN                |                                    | T                                    | BCRhigh      |                                                    | BCRhigh                                              | nd        | No           | 2             |
| 1702   | Male   | LN                |                                    |                                      | BCRlow       |                                                    | BCRlow                                               | UM        | No           | 2             |
| 2302   | Female | LN                |                                    |                                      | BCRlow       |                                                    | BCRlow                                               | M         | No           | 0             |
| 2402   | Male   | LN                |                                    |                                      | BCRhigh      |                                                    | BCRhigh                                              | UM        | No           | 0             |
| 2403   | Male   | LN                |                                    | T                                    | BCRhigh      |                                                    | BCRhigh                                              | nd        | Yes          | 0             |
| 2503   | Male   | LN                |                                    |                                      | BCRlow       |                                                    | BCRlow                                               | nd        | No           | 0             |
| 2902   | Male   | LN                |                                    |                                      | BCRhigh      |                                                    | BCRhigh                                              | UM        | No           | 2             |
| 3003   | Female | LN                |                                    |                                      | BCRlow       |                                                    | BCRlow                                               | UM        | No           | 0             |
| 3006   | Male   | LN                |                                    |                                      | BCRlow       |                                                    | BCRlow                                               | UM        | Yes          | 0             |
| 3008   | Female | LN                |                                    |                                      | BCRlow       |                                                    | BCRlow                                               | UM        | Yes          | 2             |
| 3702   | Male   | LN                |                                    |                                      | BCRhigh      |                                                    | BCRhigh                                              | UM        | No           | 0             |
| 3705   | Male   | LN                |                                    |                                      | BCRlow       |                                                    | BCRlow                                               | UM        | Yes          | 2             |
| 3708   | Female | LN                |                                    | T                                    | BCRhigh      |                                                    | BCRhigh                                              | nd        | No           | 0             |
| 4002   | Female | LN                |                                    |                                      | BCRlow       |                                                    | BCRlow                                               | nd        | Yes          | 2             |
| 4402   | Male   | LN                |                                    | T                                    | BCRlow       |                                                    | BCRlow                                               | nd        | No           | 0             |
| 4404   | Male   | LN                |                                    |                                      | BCRhigh      |                                                    | BCRhigh                                              | UM        | No           | 0             |
| 4702   | Male   | LN                |                                    | T                                    | BCRlow       |                                                    | BCRlow                                               | nd        | No           | 2             |
| 5101   | Male   | LN                |                                    | T                                    | BCRlow       |                                                    | BCRlow                                               | nd        | No           | na            |
| 105    | Male   | PB                |                                    |                                      | BCRhigh      | BCRhigh                                            |                                                      | UM        | Yes          | 2             |
| 205    | Female | PB                | V                                  |                                      | BCRlow       | BCRlow                                             |                                                      | UM        | na           | na            |
| 301    | Male   | PB                | T                                  |                                      | BCRhigh      | BCRhigh                                            |                                                      | M         | na           | 0             |
| 306    | Male   | PB                |                                    |                                      | BCRhigh      | BCRhigh                                            |                                                      | UM        | No           | 0             |
| 404    | Male   | PB                | T                                  |                                      | BCRlow       | BCRlow                                             |                                                      | UM        | Yes          | 2             |
| 408    | Female | PB                | V                                  |                                      | BCRlow       | BCRlow                                             |                                                      | UM        | No           | 0             |
| 409    | Male   | PB                | V                                  |                                      | BCRlow       | BCRlow                                             |                                                      | UM        | Yes          | 0             |
| 410    | Male   | PB                | T                                  |                                      | BCRhigh      | BCRhigh                                            |                                                      | UM        | No           | 0             |
| 412    | Female | PB                | V                                  |                                      | BCRhigh      | BCRhigh                                            |                                                      | UM        | Yes          | 0             |
| 505    | Male   | PB                | V                                  |                                      | BCRlow       | BCRlow                                             |                                                      | UM        | Yes          | 2             |
| 506    | Male   | PB                | T                                  |                                      | BCRhigh      | BCRhigh                                            |                                                      | UM        | No           | 0             |
| 507    | Male   | PB                | T                                  |                                      | BCRlow       | BCRlow                                             |                                                      | UM        | Yes          | 0             |
| 511    | Male   | PB                |                                    |                                      | BCRlow       | BCRlow                                             |                                                      | nd        | No           | 2             |
| 513    | Male   | PB                |                                    |                                      | BCRhigh      | BCRhigh                                            |                                                      | UM        | Yes          | 0             |
| 601    | Male   | PB                | T                                  |                                      | BCRhigh      | BCRhigh                                            |                                                      | M         | Yes          | 0             |
| 604    | Male   | PB                | V                                  |                                      | BCRhigh      | BCRhigh                                            |                                                      | UM        | No           | 2             |
| 610    | Male   | PB                |                                    |                                      | BCRhigh      | BCRhigh                                            |                                                      | UM        | Yes          | 0             |
| 703    | Male   | PB                | V                                  |                                      | BCRhigh      | BCRhigh                                            |                                                      | M         | Yes          | 0             |
| 707    | Male   | PB                | V                                  |                                      | BCRhigh      | BCRhigh                                            |                                                      | UM        | Yes          | 0             |
| 802    | Female | PB                | T                                  |                                      | BCRhigh      | BCRhigh                                            |                                                      | UM        | No           | 0             |
| 1201   | Female | PB                | V                                  |                                      | BCRlow       | BCRlow                                             |                                                      | UM        | No           | 0             |
| 1307   | Female | PB                |                                    |                                      | BCRlow       | BCRlow                                             |                                                      | UM        | No           | 0             |
| 1309   | Male   | PB                |                                    |                                      | BCRhigh      | BCRhigh                                            |                                                      | UM        | Yes          | na            |
| 1513   | Male   | PB                |                                    |                                      | BCRlow       | BCRlow                                             |                                                      | nd        | No           | 0             |
| 1606   | Female | PB                |                                    |                                      | BCRhigh      | BCRhigh                                            |                                                      | M         | Yes          | na            |
| 1701   | Female | PB                | T                                  |                                      | BCRlow       | BCRlow                                             |                                                      | UM        | No           | 2             |
| 1901   | Female | PB                | T                                  |                                      | BCRhigh      | BCRhigh                                            |                                                      | UM        | No           | 0             |
| 2001   | Male   | PB                | T                                  |                                      | BCRlow       | BCRlow                                             |                                                      | UM        | Yes          | 0             |
| 2103   | Female | PB                |                                    |                                      | BCRlow       | BCRlow                                             |                                                      | nd        | na           | na            |
| 2301   | Male   | PB                | T                                  |                                      | BCRlow       | BCRlow                                             |                                                      | M         | No           | 0             |
| 2310   | Female | PB                |                                    |                                      | BCRlow       | BCRlow                                             |                                                      | M         | Yes          | 2             |
| 2602   | Male   | PB                | T                                  |                                      | BCRlow       | BCRlow                                             |                                                      | UM        | No           | 0             |
| 3304   | Female | PB                | T                                  |                                      | BCRlow       | BCRlow                                             |                                                      | UM        | No           | 2             |
| 3401   | Male   | PB                |                                    |                                      | BCRhigh      | BCRhigh                                            |                                                      | UM        | Yes          | 2             |

|      |        |       |   |         |         |         |    |     |    |
|------|--------|-------|---|---------|---------|---------|----|-----|----|
| 4103 | Male   | PB    |   | BCRhigh | BCRhigh |         | UM | No  | 2  |
| 4301 | Female | PB    | V | BCRlow  | BCRlow  |         | UM | Yes | 2  |
| 4305 | Male   | PB    |   | BCRhigh | BCRhigh |         | UM | na  | na |
| 4703 | Female | PB    |   | BCRlow  | BCRlow  |         | UM | No  | 2  |
| 5202 | Male   | PB    |   | BCRlow  | BCRlow  |         | UM | No  | 0  |
| 5206 | Female | PB    |   | BCRhigh | BCRhigh |         | UM | na  | na |
| 102  | Male   | PB/LN | T | BCRlow  | BCRhigh | BCRlow  | nd | Yes | 2  |
| 411  | Male   | PB/LN |   | BCRlow  | BCRlow  | BCRlow  | M  | No  | 0  |
| 2501 | Male   | PB/LN | T | BCRhigh | BCRhigh | BCRhigh | UM | No  | 0  |
| 2901 | Male   | PB/LN | T | BCRhigh | BCRhigh | BCRhigh | nd | na  | 2  |
| 3701 | Female | PB/LN | T | BCRhigh | BCRhigh | BCRhigh | M  | No  | 0  |
| 3706 | Male   | PB/LN |   | BCRlow  | BCRlow  | BCRlow  | UM | na  | 2  |

PB: Peripheral Blood; LN: Lymph Node; DT: Decision Tree model; UM: Unmutated IGHV; M: Mutated IGHV; nd: not done; na: not available; T: Training dataset; V: Validation dataset.

**Table S3. Differentially expressed genes between BCRlow and BCRhigh MCL cells**

| ProbeName      | GeneSymbol   | Description                                                                                                                        | Fold change (BCRhigh vs BCRlow) | Regulation (BCRhigh vs BCRlow) | Position in Heatmap |
|----------------|--------------|------------------------------------------------------------------------------------------------------------------------------------|---------------------------------|--------------------------------|---------------------|
| A_23_P131899   | SDCBP2       | Homo sapiens syndecan binding protein (syntenin) 2 (SDCBP2), transcript variant 1, mRNA [NM_080489]                                | 3.837                           | down                           | 1                   |
| A_33_P3254331  | CTRC         | Homo sapiens chymotrypsin C (caldecrin) (CTRC), mRNA [NM_007272]                                                                   | 4.126                           | down                           | 2                   |
| A_33_P3310070  | FOXK2        | Homo sapiens forkhead box K2 (FOXK2), mRNA [NM_004514]                                                                             | 4.114                           | down                           | 3                   |
| A_33_P3651911  | na           | cancer susceptibility candidate 7 (non-protein coding) [Source:HGNC Symbol;Acc:HGNC:48905] [ENST00000560295]                       | 5.803                           | down                           | 4                   |
| A_23_P112159   | AGO2         | Homo sapiens argonaute RISC catalytic component 2 (AGO2), transcript variant 1, mRNA [NM_012154]                                   | 6.121                           | down                           | 5                   |
| A_23_P62642    | CFAP45       | Homo sapiens cilia and flagella associated protein 45 (CFAP45), mRNA [NM_012337]                                                   | 6.836                           | down                           | 6                   |
| A_33_P3393684  | VSIG8        | Homo sapiens V-set and immunoglobulin domain containing 8 (VSIG8), mRNA [NM_001013661]                                             | 7.906                           | down                           | 7                   |
| A_23_P356616   | ABTB2        | Homo sapiens ankyrin repeat and BTB (POZ) domain containing 2 (ABTB2), mRNA [NM_145804]                                            | 3.503                           | down                           | 8                   |
| A_33_P3274647  | CAMK2A       | Homo sapiens calcium/calmodulin-dependent protein kinase II alpha (CAMK2A), transcript variant 1, mRNA [NM_015981]                 | 9.697                           | down                           | 9                   |
| A_24_P781615   | AOC4P        | Homo sapiens amine oxidase, copper containing 4, pseudogene (AOC4P), non-coding RNA [NR_002773]                                    | 4.222                           | down                           | 10                  |
| A_33_P3374190  | INPP5A       | Homo sapiens inositol polyphosphate-5-phosphatase, 40kDa (INPP5A), mRNA [NM_005539]                                                | 7.494                           | down                           | 11                  |
| A_24_P26897    | INPP5A       | Homo sapiens inositol polyphosphate-5-phosphatase, 40kDa (INPP5A), mRNA [NM_005539]                                                | 5.480                           | down                           | 12                  |
| A_21_P0011503  | na           | ens                                                                                                                                | 8.473                           | down                           | 13                  |
| A_33_P3287068  | MTUS2-AS1    | Homo sapiens MTUS2 antisense RNA 1 (MTUS2-AS1), long non-coding RNA [NR_046378]                                                    | 9.289                           | down                           | 14                  |
| A_23_P163639   | ANKRD11      | Homo sapiens ankyrin repeat domain 11 (ANKRD11), transcript variant 2, mRNA [NM_013275]                                            | 4.157                           | down                           | 15                  |
| A_24_P363278   | MAK          | Homo sapiens male germ cell-associated kinase (MAK), transcript variant 1, mRNA [NM_005906]                                        | 3.620                           | down                           | 16                  |
| A_23_P154688   | SLC4A11      | Homo sapiens solute carrier family 4, sodium borate transporter, member 11 (SLC4A11), transcript variant 2, mRNA [NM_032034]       | 3.149                           | down                           | 17                  |
| A_21_P0001690  | lnc-IFI44-2  | LCNCipedia lincRNA (lnc-IFI44-2), lincRNA [lnc-IFI44-2:1]                                                                          | 3.691                           | down                           | 18                  |
| A_23_P204801   | SLC41A2      | Homo sapiens solute carrier family 41 (magnesium transporter), member 2 (SLC41A2), mRNA [NM_032148]                                | 3.424                           | down                           | 19                  |
| A_33_P3415596  | na           | ens                                                                                                                                | 4.343                           | down                           | 20                  |
| A_33_P3225091  | NUMBL        | Homo sapiens numb homolog (Drosophila)-like (NUMBL), transcript variant 1, mRNA [NM_004756]                                        | 6.128                           | down                           | 21                  |
| A_23_P74887    | SDC3         | Homo sapiens syndecan 3 (SDC3), mRNA [NM_014654]                                                                                   | 4.002                           | down                           | 22                  |
| A_33_P3241884  | SDC3         | Homo sapiens syndecan 3 (SDC3), mRNA [NM_014654]                                                                                   | 3.200                           | down                           | 23                  |
| A_33_P3223116  | HIPK2        | homeodomain interacting protein kinase 2 [Source:HGNC Symbol;Acc:HGNC:14402] [ENST00000342645]                                     | 4.150                           | down                           | 24                  |
| A_33_P3223121  | HIPK2        | Homo sapiens homeodomain interacting protein kinase 2 (HIPK2), transcript variant 2, mRNA [NM_001113239]                           | 3.908                           | down                           | 25                  |
| A_21_P0010208  | na           | 0                                                                                                                                  | 3.171                           | down                           | 26                  |
| A_23_P317756   | ACSM3        | Homo sapiens acyl-CoA synthetase medium-chain family member 3 (ACSM3), transcript variant 2, mRNA [NM_202000]                      | 3.580                           | down                           | 27                  |
| A_23_P305616   | LOC652276    | Homo sapiens potassium channel tetramerization domain containing 5 pseudogene (LOC652276), non-coding RNA [NR_015441]              | 3.592                           | down                           | 28                  |
| A_33_P3343828  | lnc-CEMP1-1  | Homo sapiens cDNA FLJ44722 fis, clone BRACE3022847. [AK126677]                                                                     | 3.513                           | down                           | 29                  |
| A_21_P0008871  | FLJ42627     | Homo sapiens uncharacterized LOC645644 (FLJ42627), long non-coding RNA [NR_024492]                                                 | 3.690                           | down                           | 30                  |
| A_33_P3354796  | FLJ42627     | Homo sapiens uncharacterized LOC645644 (FLJ42627), long non-coding RNA [NR_024492]                                                 | 3.676                           | down                           | 31                  |
| A_33_P3871347  | SNED1        | Homo sapiens sushi, nidogen and EGF-like domains 1 (SNED1), mRNA [NM_001080437]                                                    | 3.168                           | down                           | 32                  |
| A_19_P00317171 | CASC8        | Homo sapiens cancer susceptibility candidate 8 (non-protein coding) (CASC8), transcript variant 2, long non-coding RNA [NR_024393] | 3.149                           | down                           | 33                  |
| A_24_P281975   | GNPTAB       | Homo sapiens N-acetylglucosamine-1-phosphate transferase, alpha and beta subunits (GNPTAB), mRNA [NM_024312]                       | 3.258                           | down                           | 34                  |
| A_33_P3640690  | ZEB1         | Homo sapiens zinc finger E-box binding homeobox 1 (ZEB1), transcript variant 1, mRNA [NM_001128128]                                | 3.521                           | down                           | 35                  |
| A_33_P3229702  | WFIKKN1      | Homo sapiens WAP, follistatin/kazal, immunoglobulin, kunitz and netrin domain containing 1 (WFIKKN1), mRNA [NM_053284]             | 6.968                           | down                           | 36                  |
| A_33_P3325723  | CHN1         | Homo sapiens chimerin 1 (CHN1), transcript variant 1, mRNA [NM_001822]                                                             | 4.822                           | down                           | 37                  |
| A_33_P3432135  | EPHA1-AS1    | Homo sapiens EPHA1 antisense RNA 1 (EPHA1-AS1), long non-coding RNA [NR_033897]                                                    | 3.884                           | down                           | 38                  |
| A_33_P3265855  | PRRS-ARHGAP8 | Homo sapiens PRR5-ARHGAP8 readthrough (PRRS-ARHGAP8), mRNA [NM_181334]                                                             | 3.359                           | down                           | 39                  |
| A_33_P3250671  | TCF7         | Homo sapiens transcription factor 7 (T-cell specific, HMG-box) (TCF7), transcript variant 1, mRNA [NM_003202]                      | 3.457                           | down                           | 40                  |
| A_23_P132760   | TRH          | Homo sapiens thyrotropin-releasing hormone (TRH), mRNA [NM_007117]                                                                 | 3.349                           | down                           | 41                  |
| A_23_P79247    | PGAP1        | Homo sapiens post-GPI attachment to proteins 1 (PGAP1), mRNA [NM_024989]                                                           | 3.345                           | down                           | 42                  |
| A_33_P3312735  | PGAP1        | Homo sapiens post-GPI attachment to proteins 1 (PGAP1), mRNA [NM_024989]                                                           | 3.272                           | down                           | 43                  |
| A_33_P3257312  | ATG2A        | Homo sapiens autophagy related 2A (ATG2A), mRNA [NM_015104]                                                                        | 3.403                           | down                           | 44                  |
| A_23_P361820   | ATG2A        | Homo sapiens autophagy related 2A (ATG2A), mRNA [NM_015104]                                                                        | 3.902                           | down                           | 45                  |
| A_24_P4816     | GABARAPL1    | Homo sapiens GABA(A) receptor-associated protein like 1 (GABARAPL1), mRNA [NM_031412]                                              | 5.891                           | down                           | 46                  |
| A_33_P3812669  | GABARAPL1    | Homo sapiens GABA(A) receptor-associated protein like 1 (GABARAPL1), mRNA [NM_031412]                                              | 4.634                           | down                           | 47                  |
| A_33_P3263538  | na           | nuclear paraspeckle assembly transcript 1 (non-protein coding) [Source:HGNC Symbol;Acc:HGNC:30815] [ENST00000501122]               | 3.721                           | down                           | 48                  |
| A_23_P132027   | SPAG4        | Homo sapiens sperm associated antigen 4 (SPAG4), mRNA [NM_003116]                                                                  | 3.765                           | down                           | 49                  |
| A_33_P3324765  | CSNK1D       | Homo sapiens casein kinase 1, delta (CSNK1D), transcript variant 1, mRNA [NM_001893]                                               | 3.278                           | down                           | 50                  |
| A_33_P3309491  | PTPRU        | Homo sapiens protein tyrosine phosphatase, receptor type, U (PTPRU), transcript variant 3, mRNA [NM_005704]                        | 13.763                          | down                           | 51                  |
| A_23_P208334   | PDE4A        | Homo sapiens phosphodiesterase 4A, cAMP-specific (PDE4A), transcript variant 4, mRNA [NM_006202]                                   | 5.526                           | down                           | 52                  |
| A_19_P00315493 | LOC145474    | Homo sapiens uncharacterized LOC145474 (LOC145474), long non-coding RNA [NR_027046]                                                | 3.640                           | down                           | 53                  |
| A_19_P00809708 | LOC145474    | Homo sapiens uncharacterized LOC145474 (LOC145474), long non-coding RNA [NR_027046]                                                | 4.110                           | down                           | 54                  |
| A_23_P94552    | TMEM2        | Homo sapiens transmembrane protein 2 (TMEM2), transcript variant 1, mRNA [NM_013390]                                               | 4.044                           | down                           | 55                  |
| A_23_P142389   | LSR          | Homo sapiens lipolysis stimulated lipoprotein receptor (LSR), transcript variant 2, mRNA [NM_205834]                               | 4.581                           | down                           | 56                  |
| A_33_P3266923  | LMTK2        | Homo sapiens lemur tyrosine kinase 2 (LMTK2), mRNA [NM_014916]                                                                     | 3.194                           | down                           | 57                  |
| A_33_P3265394  | WDR74        | WD repeat domain 74 [Source:HGNC Symbol;Acc:HGNC:25529] [ENST00000538098]                                                          | 3.738                           | down                           | 58                  |
| A_21_P0004458  | lnc-ARSI-1   | LCNCipedia lincRNA (lnc-ARSI-1), lincRNA [lnc-ARSI-1:1]                                                                            | 10.111                          | down                           | 59                  |
| A_21_P0003035  | lnc-RNF7-1   | LCNCipedia lincRNA (lnc-RNF7-1), lincRNA [lnc-RNF7-1:1]                                                                            | 3.751                           | down                           | 60                  |
| A_33_P3404676  | AMOT         | angiomotin [Source:HGNC Symbol;Acc:HGNC:17810] [ENST00000371958]                                                                   | 3.162                           | down                           | 61                  |
| A_23_P102950   | RSPH1        | Homo sapiens radial spoke head 1 homolog (Chlamydomonas) (RSPH1), transcript variant 1, mRNA [NM_080860]                           | 3.726                           | down                           | 62                  |

|               |                  |                                                                                                                                             |        |      |     |
|---------------|------------------|---------------------------------------------------------------------------------------------------------------------------------------------|--------|------|-----|
| A_33_P3343972 | RSPH1            | Homo sapiens radial spoke head 1 homolog (Chlamydomonas) (RSPH1), transcript variant 1, mRNA [NM_080860]                                    | 4.224  | down | 63  |
| A_23_P129157  | NEIL1            | Homo sapiens nei endonuclease VIII-like 1 (E. coli) (NEIL1), transcript variant 2, mRNA [NM_024608]                                         | 4.258  | down | 64  |
| A_21_P0006912 | lnc-SMC3-1       | lncCipedia lincRNA (lnc-SMC3-1), lincRNA [lnc-SMC3-1:2]                                                                                     | 4.582  | down | 65  |
| A_21_P0010580 | XLOC_I2_000657   | BROAD Institute lincRNA (XLOC_I2_000657), lincRNA [TCONS_I2_00000881]                                                                       | 3.487  | down | 66  |
| A_33_P3396578 | GRK5             | Homo sapiens G protein-coupled receptor kinase 5, mRNA (cDNA clone IMAGE:3912936), with apparent retained intron. [BC018116]                | 4.271  | down | 67  |
| A_21_P0006893 | lnc-KIF20B-5     | lncCipedia lincRNA (lnc-KIF20B-5), lincRNA [lnc-KIF20B-5:1]                                                                                 | 3.154  | down | 68  |
| A_33_P3250895 | PSMB11           | Homo sapiens proteasome (prosome, macropain) subunit, beta type, 11 (PSMB11), mRNA [NM_001099780]                                           | 3.377  | down | 69  |
| A_21_P0007975 | LINC00424        | long intergenic non-protein coding RNA 424 [Source:HGNC Symbol;Acc:HGNC:42815] [ENST00000413124]                                            | 3.647  | down | 70  |
| A_21_P0007497 | LINC01234        | Homo sapiens long intergenic non-protein coding RNA 1234 (LINC01234), transcript variant 1, long non-coding RNA [NR_110026]                 | 5.040  | down | 71  |
| A_23_P58729   | SLC34A1          | Homo sapiens solute carrier family 34 (type II sodium/phosphate cotransporter), member 1 (SLC34A1), transcript variant 1, mRNA [NM_003052]  | 4.726  | down | 72  |
| A_21_P0013289 | LOC646588        | PREDICTED: Homo sapiens uncharacterized LOC646588 (LOC646588), transcript variant X2, misc_RNA [XR_426148]                                  | 3.693  | down | 73  |
| A_21_P0013485 | XLOC_I2_014217   | BROAD Institute lincRNA (XLOC_I2_014217), lincRNA [TCONS_I2_00027780]                                                                       | 4.303  | down | 74  |
| A_33_P3303474 | CYP4A11          | Homo sapiens cytochrome P450, family 4, subfamily A, polypeptide 11 (CYP4A11), mRNA [NM_000778]                                             | 3.278  | down | 75  |
| A_21_P0001471 | lnc-ZBTB17-2     | lncCipedia lincRNA (lnc-ZBTB17-2), lincRNA [lnc-ZBTB17-2:1]                                                                                 | 3.221  | down | 76  |
| A_21_P0007041 | LINC00200        | long intergenic non-protein coding RNA 200 [Source:HGNC Symbol;Acc:HGNC:30974] [ENST00000583117]                                            | 3.901  | down | 77  |
| A_33_P3313283 | CILP2            | Homo sapiens cartilage intermediate layer protein 2 (CILP2), mRNA [NM_153221]                                                               | 3.459  | down | 78  |
| A_23_P412389  | FGF18            | Homo sapiens fibroblast growth factor 18 (FGF18), mRNA [NM_003862]                                                                          | 3.103  | down | 79  |
| A_33_P3235262 | PIP5K1L          | Homo sapiens phosphatidylinositol-4-phosphate 5-kinase-like 1 (PIP5K1L), transcript variant 1, mRNA [NM_001135219]                          | 3.750  | down | 80  |
| A_23_P25994   | LGMMN            | Homo sapiens legumain (LGMMN), transcript variant 2, mRNA [NM_001008530]                                                                    | 4.178  | down | 81  |
| A_33_P3799936 | ARHGEF10L        | Homo sapiens Rho guanine nucleotide exchange factor (GEF) 10-like (ARHGEF10L), transcript variant 1, mRNA [NM_018125]                       | 3.247  | down | 82  |
| A_33_P3409159 | SLC22A23         | Homo sapiens solute carrier family 22, member 23 (SLC22A23), transcript variant 1, mRNA [NM_015482]                                         | 4.156  | down | 83  |
| A_23_P396858  | FZD8             | Homo sapiens frizzled class receptor 8 (FZD8), mRNA [NM_031866]                                                                             | 3.244  | down | 84  |
| A_24_P832426  | B3GALT1          | Homo sapiens beta 1,3-galactosyltransferase-like (B3GALT1), mRNA [NM_194318]                                                                | 4.267  | down | 85  |
| A_33_P3413098 | LOC100129550     | Homo sapiens uncharacterized LOC100129550 (LOC100129550), long non-coding RNA [NR_024618]                                                   | 3.394  | down | 86  |
| A_23_P315571  | RFTN1            | Homo sapiens raftlin, lipid raft linker 1 (RFTN1), mRNA [NM_015150]                                                                         | 4.643  | down | 87  |
| A_21_P0013889 | na               | raftlin, lipid raft linker 1 pseudogene 1 [Source:HGNC Symbol;Acc:HGNC:23971] [ENST00000442584]                                             | 3.864  | down | 88  |
| A_32_P41026   | SC5D             | Homo sapiens sterol-C5-desaturase (SC5D), transcript variant 2, mRNA [NM_001024956]                                                         | 3.155  | down | 89  |
| A_23_P328206  | DNMBP            | Homo sapiens dynamin binding protein (DNMBP), mRNA [NM_015221]                                                                              | 4.108  | down | 90  |
| A_33_P3347035 | na               | Homo sapiens cDNA clone IMAGE:7262526, with apparent retained intron. [BC069659]                                                            | 5.251  | down | 91  |
| A_33_P3390708 | TMEM2            | Homo sapiens transmembrane protein 2 (TMEM2), transcript variant 1, mRNA [NM_013390]                                                        | 5.721  | down | 92  |
| A_24_P324405  | ANKRD11          | Homo sapiens ankyrin repeat domain 11 (ANKRD11), transcript variant 2, mRNA [NM_013275]                                                     | 3.639  | down | 93  |
| A_23_P80778   | DIRC2            | Homo sapiens disrupted in renal carcinoma 2 (DIRC2), mRNA [NM_032839]                                                                       | 4.040  | down | 94  |
| A_23_P166297  | ABCG1            | Homo sapiens ATP-binding cassette, sub-family G (WHITE), member 1 (ABCG1), transcript variant 5, mRNA [NM_207627]                           | 4.285  | down | 95  |
| A_21_P0005231 | na               | 0                                                                                                                                           | 3.230  | down | 96  |
| A_23_P203743  | GAB2             | Homo sapiens GRB2-associated binding protein 2 (GAB2), transcript variant 2, mRNA [NM_012296]                                               | 5.934  | down | 97  |
| A_23_P154526  | GRB14            | Homo sapiens growth factor receptor-bound protein 14 (GRB14), transcript variant 1, mRNA [NM_004490]                                        | 3.751  | down | 98  |
| A_21_P0007219 | lnc-AP000769.1-1 | lncCipedia lincRNA (lnc-AP000769.1-1), lincRNA [lnc-AP000769.1-1:1]                                                                         | 6.459  | down | 99  |
| A_23_P101905  | APC2             | Homo sapiens adenomatosis polyposis coli 2 (APC2), mRNA [NM_005883]                                                                         | 5.499  | down | 100 |
| A_33_P3415052 | NIPAL4           | Homo sapiens NIPA-like domain containing 4 (NIPAL4), transcript variant 2, mRNA [NM_001172292]                                              | 3.778  | down | 101 |
| A_33_P3401753 | FFAR3            | Homo sapiens free fatty acid receptor 3 (FFAR3), mRNA [NM_005304]                                                                           | 4.966  | down | 102 |
| A_33_P3298810 | FFAR3            | Homo sapiens free fatty acid receptor 3 (FFAR3), mRNA [NM_005304]                                                                           | 5.254  | down | 103 |
| A_23_P127824  | TNNT3            | Homo sapiens troponin T type 3 (skeletal, fast) (TNNT3), transcript variant 3, mRNA [NM_001042780]                                          | 3.149  | down | 104 |
| A_33_P3382229 | TNNT3            | Homo sapiens troponin T type 3 (skeletal, fast) (TNNT3), transcript variant 5, mRNA [NM_001297646]                                          | 5.933  | down | 105 |
| A_23_P431933  | CAMKK1           | Homo sapiens calcium/calmodulin-dependent protein kinase kinase 1, alpha (CAMKK1), transcript variant 1, mRNA [NM_032294]                   | 4.313  | down | 106 |
| A_24_P292929  | CAMKK1           | Homo sapiens calcium/calmodulin-dependent protein kinase kinase 1, alpha (CAMKK1), transcript variant 3, mRNA [NM_172207]                   | 4.297  | down | 107 |
| A_23_P325631  | SKI              | Homo sapiens v-ski avian sarcoma viral oncogene homolog (SKI), mRNA [NM_003036]                                                             | 3.953  | down | 108 |
| A_24_P285032  | IDS              | Homo sapiens iduronate 2-sulfatase (IDS), transcript variant 2, mRNA [NM_006123]                                                            | 4.071  | down | 109 |
| A_32_P205944  | RGPD5            | Homo sapiens RANBP2-like and GRIP domain containing 5 (RGPD5), transcript variant 1, mRNA [NM_005054]                                       | 3.175  | down | 110 |
| A_23_P360316  | FUT3             | Homo sapiens fucosyltransferase 3 (galactoside 3(4)-L-fucosyltransferase, Lewis blood group) (FUT3), transcript variant 1, mRNA [NM_000149] | 3.739  | down | 111 |
| A_24_P179044  | SNX9             | Homo sapiens sorting nexin 9 (SNX9), mRNA [NM_016224]                                                                                       | 8.235  | down | 112 |
| A_24_P276873  | ERMN             | ermin, ERM-like protein [Source:HGNC Symbol;Acc:HGNC:29208] [ENST00000409395]                                                               | 5.065  | down | 113 |
| A_33_P3250165 | ERMN             | ermin, ERM-like protein [Source:HGNC Symbol;Acc:HGNC:29208] [ENST00000411762]                                                               | 4.371  | down | 114 |
| A_24_P335620  | SLC7A5           | Homo sapiens solute carrier family 7 (amino acid transporter light chain, L system), member 5 (SLC7A5), mRNA [NM_003486]                    | 6.363  | down | 115 |
| A_23_P20494   | NDRG1            | Homo sapiens N-myc downstream regulated 1 (NDRG1), transcript variant 2, mRNA [NM_006096]                                                   | 5.034  | down | 116 |
| A_23_P143016  | ARID5A           | Homo sapiens AT rich interactive domain 5A (MRF1-like) (ARID5A), mRNA [NM_212481]                                                           | 3.357  | down | 117 |
| A_33_P3389342 | ARID5A           | Homo sapiens AT rich interactive domain 5A (MRF1-like) (ARID5A), mRNA [NM_212481]                                                           | 3.363  | down | 118 |
| A_23_P170290  | TMEM57           | Homo sapiens transmembrane protein 57 (TMEM57), transcript variant 1, mRNA [NM_018202]                                                      | 3.150  | down | 119 |
| A_21_P0009331 | TMEM92-AS1       | Homo sapiens TMEM92 antisense RNA 1 (TMEM92-AS1), long non-coding RNA [NR_125805]                                                           | 9.689  | down | 120 |
| A_21_P0009196 | TMEM92-AS1       | Homo sapiens TMEM92 antisense RNA 1 (TMEM92-AS1), long non-coding RNA [NR_125805]                                                           | 10.987 | down | 121 |
| A_23_P58506   | ELL2             | Homo sapiens elongation factor, RNA polymerase II, 2 (ELL2), mRNA [NM_012081]                                                               | 4.228  | down | 122 |
| A_33_P3401428 | TMEM38B          | Homo sapiens transmembrane protein 38B (TMEM38B), mRNA [NM_018112]                                                                          | 3.138  | down | 123 |
| A_23_P139919  | CHST11           | Homo sapiens carbohydrate (chondroitin 4) sulfotransferase 11 (CHST11), transcript variant 1, mRNA [NM_018413]                              | 3.154  | down | 124 |
| A_21_P0002056 | na               | 0                                                                                                                                           | 3.469  | down | 125 |
| A_33_P3294679 | SMCR5            | Homo sapiens Smith-Magenis syndrome chromosome region, candidate 5 (non-protein coding) (SMCR5), long non-coding RNA [NR_024007]            | 3.943  | down | 126 |

|               |              |                                                                                                                                          |        |      |     |
|---------------|--------------|------------------------------------------------------------------------------------------------------------------------------------------|--------|------|-----|
| A_33_P3339531 | CHADL        | Homo sapiens chondroadherin-like (CHADL), mRNA [NM_138481]                                                                               | 3.440  | down | 127 |
| A_23_P5853    | SAG          | Homo sapiens S-antigen; retina and pineal gland (arrestin) (SAG), mRNA [NM_000541]                                                       | 3.534  | down | 128 |
| A_23_P426305  | AOC3         | Homo sapiens amine oxidase, copper containing 3 (AOC3), transcript variant 1, mRNA [NM_003734]                                           | 4.095  | down | 129 |
| A_33_P3279353 | AZU1         | Homo sapiens azurocidin 1 (AZU1), mRNA [NM_001700]                                                                                       | 5.458  | down | 130 |
| A_23_P19030   | ARSI         | Homo sapiens arylsulfatase family, member I (ARSI), mRNA [NM_001012301]                                                                  | 19.301 | down | 131 |
| A_33_P3239527 | LOC100128517 | Homo sapiens cDNA FLJ44820 fis, clone BRACE3046049. [AK126772]                                                                           | 5.197  | down | 132 |
| A_33_P3226367 | lnc-CD44-1   | LNCipedia lincRNA (lnc-CD44-1), lincRNA [lnc-CD44-1:1]                                                                                   | 8.220  | down | 133 |
| A_33_P3299416 | GRASP        | Homo sapiens GRP1 (general receptor for phosphoinositides 1)-associated scaffold protein (GRASP), transcript variant 1, mRNA [NM_181711] | 3.124  | down | 134 |
| A_33_P3336592 | KLF13        | Homo sapiens cDNA FLJ45109 fis, clone BRAWH3034097. [AK127052]                                                                           | 3.429  | down | 135 |
| A_21_P0009442 | LINC01540    | Homo sapiens long intergenic non-protein coding RNA 1540 (LINC01540), transcript variant 1, long non-coding RNA [NR_110429]              | 3.465  | down | 136 |
| A_33_P3361896 | LOC100127994 | Homo sapiens cDNA FLJ45631 fis, clone CHONS2001797. [AK127538]                                                                           | 3.342  | down | 137 |
| A_24_P286951  | PLEKHS1      | Homo sapiens pleckstrin homology domain containing, family S member 1 (PLEKHS1), transcript variant 4, mRNA [NM_024889]                  | 3.508  | down | 138 |
| A_33_P3309832 | PLEKHS1      | Homo sapiens pleckstrin homology domain containing, family S member 1 (PLEKHS1), transcript variant 1, mRNA [NM_182601]                  | 3.606  | down | 139 |
| A_33_P3232677 | na           | 0                                                                                                                                        | 3.122  | down | 140 |
| A_21_P0013391 | na           | 0                                                                                                                                        | 4.124  | down | 141 |
| A_23_P39550   | TMEM163      | Homo sapiens transmembrane protein 163 (TMEM163), mRNA [NM_030923]                                                                       | 5.852  | down | 142 |
| A_21_P0004840 | lnc-CD83-2   | LNCipedia lincRNA (lnc-CD83-2), lincRNA [lnc-CD83-2:1]                                                                                   | 4.882  | down | 143 |
| A_23_P9869    | CNDP1        | Homo sapiens carnosine dipeptidase 1 (metallopeptidase M20 family) (CNDP1), mRNA [NM_032649]                                             | 4.912  | down | 144 |
| A_33_P3281473 | FAM83A-AS1   | Homo sapiens FAM83A antisense RNA 1 (FAM83A-AS1), long non-coding RNA [NR_024479]                                                        | 3.239  | down | 145 |
| A_33_P3301351 | RBM44        | Homo sapiens RNA binding motif protein 44 (RBM44), mRNA [NM_001080504]                                                                   | 3.484  | down | 146 |
| A_33_P3374087 | RBM44        | Homo sapiens RNA binding motif protein 44 (RBM44), mRNA [NM_001080504]                                                                   | 4.292  | down | 147 |
| A_33_P3543133 | LINC00641    | Homo sapiens long intergenic non-protein coding RNA 641 (LINC00641), transcript variant 1, long non-coding RNA [NR_038970]               | 3.383  | down | 148 |
| A_32_P137920  | RSPH4A       | Homo sapiens radial spoke head 4 homolog A (Chlamydomonas) (RSPH4A), transcript variant 1, mRNA [NM_001010892]                           | 3.613  | down | 149 |
| A_24_P520767  | LOC149351    | 0                                                                                                                                        | 3.446  | down | 150 |
| A_23_P148541  | CTAG1A       | Homo sapiens cancer/testis antigen 1A (CTAG1A), mRNA [NM_139250]                                                                         | 3.802  | down | 151 |
| A_24_P128442  | TBX15        | Homo sapiens T-box 15 (TBX15), mRNA [NM_152380]                                                                                          | 3.910  | down | 152 |
| A_21_P0001044 | LINC01031    | Homo sapiens long intergenic non-protein coding RNA 1031 (LINC01031), long non-coding RNA [NR_125789]                                    | 3.337  | down | 153 |
| A_21_P0010389 | na           | Homo sapiens cDNA FLJ46287 fis, clone TEST14032375. [AK128164]                                                                           | 3.642  | down | 154 |
| A_33_P3224819 | SLC45A4      | Homo sapiens solute carrier family 45, member 4 (SLC45A4), transcript variant 1, mRNA [NM_001286646]                                     | 7.139  | down | 155 |
| A_23_P209320  | PER2         | Homo sapiens period circadian clock 2 (PER2), mRNA [NM_022817]                                                                           | 3.272  | down | 156 |
| A_23_P411162  | PER2         | Homo sapiens period circadian clock 2 (PER2), mRNA [NM_022817]                                                                           | 3.187  | down | 157 |
| A_24_P380311  | CAMK2A       | Homo sapiens calcium/calmodulin-dependent protein kinase II alpha (CAMK2A), transcript variant 1, mRNA [NM_015981]                       | 7.602  | down | 158 |
| A_23_P54996   | TEX14        | Homo sapiens testis expressed 14 (TEX14), transcript variant 1, mRNA [NM_198393]                                                         | 15.998 | down | 159 |
| A_23_P401106  | PDE2A        | Homo sapiens phosphodiesterase 2A, cGMP-stimulated (PDE2A), transcript variant 1, mRNA [NM_002599]                                       | 9.232  | down | 160 |
| A_24_P20200   | PLEKHB2      | Homo sapiens pleckstrin homology domain containing, family B (evectins) member 2 (PLEKHB2), transcript variant 8, mRNA [NM_001267066]    | 3.255  | down | 161 |
| A_23_P21560   | FAM49A       | Homo sapiens family with sequence similarity 49, member A (FAM49A), mRNA [NM_030797]                                                     | 4.068  | down | 162 |
| A_33_P3236392 | PVRL4        | Homo sapiens poliovirus receptor-related 4 (PVRL4), mRNA [NM_030916]                                                                     | 3.696  | down | 163 |
| A_24_P149713  | ZBTB43       | Homo sapiens zinc finger and BTB domain containing 43 (ZBTB43), transcript variant 1, mRNA [NM_014007]                                   | 3.884  | down | 164 |
| A_23_P122662  | GFOD1        | Homo sapiens glucose-fructose oxidoreductase domain containing 1 (GFOD1), transcript variant 1, mRNA [NM_018988]                         | 3.152  | down | 165 |
| A_33_P3418000 | RELL1        | Homo sapiens RELT-like 1 (RELL1), transcript variant 2, mRNA [NM_001085399]                                                              | 4.505  | down | 166 |
| A_24_P322474  | PDE4A        | Homo sapiens phosphodiesterase 4A, cAMP-specific (PDE4A), transcript variant 4, mRNA [NM_006202]                                         | 7.198  | down | 167 |
| A_23_P5903    | SLCO4A1      | Homo sapiens solute carrier organic anion transporter family, member 4A1 (SLCO4A1), mRNA [NM_016354]                                     | 7.906  | down | 168 |
| A_32_P5251    | RARA         | Homo sapiens retinoic acid receptor, alpha (RARA), transcript variant 2, mRNA [NM_001024809]                                             | 3.576  | down | 169 |
| A_23_P128375  | FAM222A      | Homo sapiens family with sequence similarity 222, member A (FAM222A), mRNA [NM_032829]                                                   | 4.295  | down | 170 |
| A_33_P3294801 | na           | Homo sapiens cDNA FLJ40672 fis, clone THYMU2021509. [AK097991]                                                                           | 3.654  | down | 171 |
| A_33_P3245126 | na           | 0                                                                                                                                        | 3.351  | down | 172 |
| A_23_P301304  | FGFR1        | Homo sapiens fibroblast growth factor receptor 1 (FGFR1), transcript variant 1, mRNA [NM_023110]                                         | 4.341  | down | 173 |
| A_23_P372923  | FGFR1        | Homo sapiens fibroblast growth factor receptor 1 (FGFR1), transcript variant 13, mRNA [NM_001174066]                                     | 3.133  | down | 174 |
| A_24_P82155   | ANKDD1A      | ankyrin repeat and death domain containing 1A [Source:HGNC Symbol;Acc:HGNC:28002] [ENST00000620154]                                      | 3.180  | down | 175 |
| A_23_P210763  | JAG1         | Homo sapiens jagged 1 (JAG1), mRNA [NM_000214]                                                                                           | 4.692  | down | 176 |
| A_23_P76823   | ADSSL1       | Homo sapiens adenylosuccinate synthase like 1 (ADSSL1), transcript variant 1, mRNA [NM_199165]                                           | 3.315  | down | 177 |
| A_24_P253003  | WNT11        | Homo sapiens wingless-type MMTV integration site family, member 11 (WNT11), mRNA [NM_004626]                                             | 3.374  | down | 178 |
| A_33_P3813128 | SEMA3F       | Homo sapiens sema domain, immunoglobulin domain (Ig), short basic domain, secreted, (semaphorin) 3F (SEMA3F), mRNA [NM_004186]           | 3.736  | down | 179 |
| A_24_P389916  | LRRC32       | Homo sapiens leucine rich repeat containing 32 (LRRC32), transcript variant 1, mRNA [NM_005512]                                          | 6.504  | down | 180 |
| A_33_P3351249 | CXCL16       | Homo sapiens chemokine (C-X-C motif) ligand 16 (CXCL16), transcript variant 2, mRNA [NM_001100812]                                       | 3.928  | down | 181 |
| A_33_P3623118 | lnc-MGAT1-1  | Homo sapiens cDNA FLJ30091 fis, clone BNGH41000017. [AK054653]                                                                           | 3.436  | down | 182 |
| A_23_P37484   | CHSY1        | Homo sapiens chondroitin sulfate synthase 1 (CHSY1), mRNA [NM_014918]                                                                    | 3.122  | down | 183 |
| A_23_P218626  | NEU4         | Homo sapiens sialidase 4 (NEU4), transcript variant 1, mRNA [NM_080741]                                                                  | 6.189  | down | 184 |
| A_23_P348121  | FOSL2        | Homo sapiens FOS-like antigen 2 (FOSL2), mRNA [NM_005253]                                                                                | 7.252  | down | 185 |
| A_23_P139786  | OASL         | Homo sapiens 2'-5'-oligoadenylate synthetase-like (OASL), transcript variant 1, mRNA [NM_003733]                                         | 4.360  | down | 186 |
| A_23_P10559   | AATK         | Homo sapiens apoptosis-associated tyrosine kinase (AATK), transcript variant 1, mRNA [NM_001080395]                                      | 7.568  | down | 187 |
| A_24_P96961   | SPSB1        | Homo sapiens splA/ryanodine receptor domain and SOCS box containing 1 (SPSB1), mRNA [NM_025106]                                          | 5.773  | down | 188 |
| A_23_P134935  | DUSP4        | Homo sapiens dual specificity phosphatase 4 (DUSP4), transcript variant 1, mRNA [NM_001394]                                              | 4.493  | down | 189 |
| A_23_P85922   | BMP8A        | Homo sapiens bone morphogenetic protein 8a (BMP8A), mRNA [NM_181809]                                                                     | 11.433 | down | 190 |

|               |                |                                                                                                                                |        |      |     |
|---------------|----------------|--------------------------------------------------------------------------------------------------------------------------------|--------|------|-----|
| A_23_P34835   | LMNA           | Homo sapiens lamin A/C (LMNA), transcript variant 2, mRNA [NM_005572]                                                          | 6.395  | down | 191 |
| A_33_P3408762 | LMNA           | Homo sapiens lamin A/C (LMNA), transcript variant 6, mRNA [NM_001282625]                                                       | 7.222  | down | 192 |
| A_23_P106024  | JAG2           | Homo sapiens jagged 2 (JAG2), transcript variant 1, mRNA [NM_002226]                                                           | 4.044  | down | 193 |
| A_33_P3312676 | na             | myelin transcription factor 1 [Source:RefSeq peptide;Acc:NP_004526] [ENST00000621996]                                          | 8.594  | down | 194 |
| A_33_P3233906 | RAMP1          | Homo sapiens receptor (G protein-coupled) activity modifying protein 1 (RAMP1), mRNA [NM_005855]                               | 13.457 | down | 195 |
| A_23_P50946   | RAMP1          | Homo sapiens receptor (G protein-coupled) activity modifying protein 1 (RAMP1), mRNA [NM_005855]                               | 10.041 | down | 196 |
| A_24_P51909   | CPLX1          | Homo sapiens complexin 1 (CPLX1), mRNA [NM_006651]                                                                             | 4.868  | down | 197 |
| A_21_P0006238 | lnc-RXRA-1     | lncRNA [lnc-RXRA-1], lincRNA [lnc-RXRA-1:1]                                                                                    | 3.894  | down | 198 |
| A_33_P3417150 | P2RY1          | Homo sapiens purinergic receptor P2Y, G-protein coupled, 1 (P2RY1), mRNA [NM_002563]                                           | 3.417  | down | 199 |
| A_33_P3238626 | na             | Homo sapiens cDNA FLJ41497 fis, clone BRTHA2006075. [AK123491]                                                                 | 3.102  | down | 200 |
| A_32_P175301  | DENND3         | Homo sapiens DENN/MADD domain containing 3 (DENND3), mRNA [NM_014957]                                                          | 5.813  | down | 201 |
| A_33_P3783812 | C8orf60        | Homo sapiens cDNA FLJ12193 fis, clone MAMMA1000856. [AK022255]                                                                 | 5.868  | down | 202 |
| A_33_P3321130 | DENND3         | DENN/MADD domain containing 3 [Source:HGNC Symbol;Acc:HGNC:29134] [ENST00000520482]                                            | 5.856  | down | 203 |
| A_23_P93938   | NACAD          | Homo sapiens NAC alpha domain containing (NACAD), mRNA [NM_001146334]                                                          | 3.194  | down | 204 |
| A_21_P0010687 | XLOC_I2_000018 | BROAD Institute lincRNA (XLOC_I2_000018), lincRNA [TCONS_I2_00001952]                                                          | 4.453  | down | 205 |
| A_21_P0010689 | XLOC_I2_000018 | BROAD Institute lincRNA (XLOC_I2_000018), lincRNA [TCONS_I2_00001954]                                                          | 5.387  | down | 206 |
| A_24_P291826  | SYTL3          | Homo sapiens synaptotagmin-like 3 (SYTL3), transcript variant 3, mRNA [NM_001009991]                                           | 3.755  | down | 207 |
| A_23_P316974  | SYNJ2          | Homo sapiens synaptotagmin 2 (SYNJ2), transcript variant 1, mRNA [NM_003898]                                                   | 3.776  | down | 208 |
| A_21_P0009211 | na             | ys84c11.r1 Soares retina N2b4HR Homo sapiens cDNA clone IMAGE:221492 5', mRNA sequence [H92146]                                | 3.300  | down | 209 |
| A_23_P373724  | PPFIBP1        | Homo sapiens PTPRF interacting protein, binding protein 1 (liprin beta 1) (PPFIBP1), transcript variant 1, mRNA [NM_003622]    | 5.509  | up   | 210 |
| A_23_P75441   | NUDT22         | Homo sapiens nudix (nucleoside diphosphate linked moiety X)-type motif 22 (NUDT22), transcript variant 1, mRNA [NM_032344]     | 4.008  | up   | 211 |
| A_23_P103486  | CYP2J2         | Homo sapiens cytochrome P450, family 2, subfamily J, polypeptide 2 (CYP2J2), mRNA [NM_000775]                                  | 5.107  | up   | 212 |
| A_33_P3259183 | FAM78B         | Homo sapiens family with sequence similarity 78, member B (FAM78B), mRNA [NM_001017961]                                        | 3.448  | up   | 213 |
| A_33_P3346771 | AK9            | adenylate kinase 9 [Source:HGNC Symbol;Acc:HGNC:33814] [ENST00000466992]                                                       | 5.040  | up   | 214 |
| A_24_P73075   | TTC12          | Homo sapiens tetratricopeptide repeat domain 12 (TTC12), mRNA [NM_017868]                                                      | 3.842  | up   | 215 |
| A_23_P145541  | FIG4           | Homo sapiens FIG4 phosphoinositide 5-phosphatase (FIG4), mRNA [NM_014845]                                                      | 4.578  | up   | 216 |
| A_23_P149259  | TMEM79         | Homo sapiens transmembrane protein 79 (TMEM79), transcript variant 1, mRNA [NM_032323]                                         | 3.729  | up   | 217 |
| A_33_P3320272 | TMEM79         | Homo sapiens transmembrane protein 79 (TMEM79), transcript variant 1, mRNA [NM_032323]                                         | 4.782  | up   | 218 |
| A_33_P3256113 | GUSBP1         | Homo sapiens glucuronidase, beta pseudogene 1 (GUSBP1), transcript variant 1, non-coding RNA [NR_027026]                       | 3.781  | up   | 219 |
| A_33_P3220919 | ADRBK2         | Homo sapiens adrenergic, beta, receptor kinase 2 (ADRBK2), mRNA [NM_005160]                                                    | 4.308  | up   | 220 |
| A_33_P3356361 | SRP14-AS1      | Homo sapiens SRP14 antisense RNA1 (head to head) (SRP14-AS1), transcript variant 1, long non-coding RNA [NR_040059]            | 6.041  | up   | 221 |
| A_33_P3386117 | RER1           | Homo sapiens retention in endoplasmic reticulum sorting receptor 1 (RER1), mRNA [NM_007033]                                    | 3.523  | up   | 222 |
| A_32_P29118   | SEMA3D         | Homo sapiens sema domain, immunoglobulin domain (Ig), short basic domain, secreted, (semaphorin) 3D (SEMA3D), mRNA [NM_152754] | 7.700  | up   | 223 |
| A_23_P209962  | SMC6           | Homo sapiens structural maintenance of chromosomes 6 (SMC6), transcript variant 2, mRNA [NM_024624]                            | 3.788  | up   | 224 |
| A_21_P0001216 | lnc-C1orf186-1 | EST643 human nasopharynx Homo sapiens cDNA, mRNA sequence [CD684123]                                                           | 6.965  | up   | 225 |
| A_33_P3334443 | FAM69A         | Homo sapiens family with sequence similarity 69, member A (FAM69A), transcript variant 4, mRNA [NM_001252271]                  | 3.276  | up   | 226 |
| A_24_P941359  | FAM65B         | Homo sapiens family with sequence similarity 65, member B (FAM65B), transcript variant 1, mRNA [NM_014722]                     | 3.360  | up   | 227 |
| A_33_P3303146 | ATG4C          | Homo sapiens autophagy related 4C, cysteine peptidase (ATG4C), transcript variant 1, mRNA [NM_032852]                          | 4.357  | up   | 228 |
| A_33_P3358923 | BTLA           | Homo sapiens B and T lymphocyte associated (BTLA), transcript variant 1, mRNA [NM_181780]                                      | 4.615  | up   | 229 |
| A_33_P3412900 | CBLN3          | Homo sapiens cerebellin 3 precursor (CBLN3), mRNA [NM_001039771]                                                               | 3.680  | up   | 230 |
| A_32_P180315  | CCDC180        | Homo sapiens coiled-coil domain containing 180 (CCDC180), mRNA [NM_020893]                                                     | 4.490  | up   | 231 |
| A_33_P3302563 | LOC100129408   | Homo sapiens cDNA FLJ46023 fis, clone SPLEN2021991. [AK127916]                                                                 | 3.910  | up   | 232 |
| A_21_P0000185 | LOC100505549   | Homo sapiens uncharacterized LOC100505549 (LOC100505549), mRNA [NM_001242804]                                                  | 3.299  | up   | 233 |
| A_21_P0001575 | lnc-NOTCH2-2   | lncRNA [lnc-NOTCH2-2], lincRNA [lnc-NOTCH2-2:1]                                                                                | 5.100  | up   | 234 |
| A_24_P289178  | C16orf74       | Homo sapiens chromosome 16 open reading frame 74 (C16orf74), mRNA [NM_206967]                                                  | 3.963  | up   | 235 |
| A_23_P50775   | LRFN3          | Homo sapiens leucine rich repeat and fibronectin type III domain containing 3 (LRFN3), mRNA [NM_024509]                        | 3.168  | up   | 236 |
| A_23_P30900   | HLA-DQA2       | major histocompatibility complex, class II, DQ alpha 2 [Source:HGNC Symbol;Acc:HGNC:4943] [ENST00000552745]                    | 5.537  | up   | 237 |
| A_23_P352266  | BCL2           | Homo sapiens B-cell CLL/lymphoma 2 (BCL2), transcript variant alpha, mRNA [NM_000633]                                          | 3.304  | up   | 238 |
| A_32_P92505   | LCLAT1         | Homo sapiens lysocardiolipin acyltransferase 1 (LCLAT1), transcript variant 1, mRNA [NM_182551]                                | 3.400  | up   | 239 |
| A_23_P391228  | MANEAL         | Homo sapiens mannosidase, endo-alpha-like (MANEAL), transcript variant 1, mRNA [NM_001031740]                                  | 3.224  | up   | 240 |
| A_33_P3413483 | SORD           | sorbitol dehydrogenase [Source:HGNC Symbol;Acc:HGNC:11184] [ENST00000267814]                                                   | 3.253  | up   | 241 |
| A_24_P481824  | DPY19L4        | Homo sapiens dpy-19-like 4 (C. elegans) (DPY19L4), mRNA [NM_181787]                                                            | 3.205  | up   | 242 |
| A_23_P340188  | FAM122C        | Homo sapiens family with sequence similarity 122C (FAM122C), transcript variant 2, mRNA [NM_138819]                            | 3.865  | up   | 243 |
| A_33_P3315425 | METTL4         | Homo sapiens methyltransferase like 4 (METTL4), mRNA [NM_022840]                                                               | 3.511  | up   | 244 |
| A_23_P28733   | RBL1           | Homo sapiens retinoblastoma-like 1 (RBL1), transcript variant 1, mRNA [NM_002895]                                              | 3.191  | up   | 245 |
| A_32_P85813   | RAP1GDS1       | Homo sapiens RAP1, GTP-GDP dissociation stimulator 1 (RAP1GDS1), transcript variant 1, mRNA [NM_001100426]                     | 3.481  | up   | 246 |
| A_24_P190877  | TRMT1L         | Homo sapiens tRNA methyltransferase 1 homolog (S. cerevisiae)-like (TRMT1L), transcript variant 1, mRNA [NM_030934]            | 4.070  | up   | 247 |
| A_24_P145047  | ZNF609         | Homo sapiens zinc finger protein 609 (ZNF609), mRNA [NM_015042]                                                                | 3.570  | up   | 248 |
| A_23_P130856  | CEP89          | Homo sapiens centrosomal protein 89kDa (CEP89), mRNA [NM_032816]                                                               | 3.554  | up   | 249 |
| A_23_P80902   | KIF15          | Homo sapiens kinesin family member 15 (KIF15), mRNA [NM_020242]                                                                | 5.393  | up   | 250 |
| A_23_P19816   | RNF32          | Homo sapiens ring finger protein 32 (RNF32), transcript variant 3, mRNA [NM_030936]                                            | 3.735  | up   | 251 |
| A_23_P127915  | STK33          | Homo sapiens serine/threonine kinase 33 (STK33), transcript variant 1, mRNA [NM_030906]                                        | 8.482  | up   | 252 |
| A_23_P157527  | LRRCC1         | Homo sapiens leucine rich repeat and coiled-coil centrosomal protein 1 (LRRCC1), mRNA [NM_033402]                              | 5.072  | up   | 253 |
| A_24_P110983  | AKT3           | Homo sapiens v-akt murine thymoma viral oncogene homolog 3 (AKT3), transcript variant 1, mRNA [NM_005465]                      | 3.105  | up   | 254 |
| A_24_P88801   | NPHP1          | Homo sapiens nephronophthisis 1 (juvenile) (NPHP1), transcript variant 1, mRNA [NM_000272]                                     | 3.502  | up   | 255 |



|                |                |                                                                                                                          |       |    |     |
|----------------|----------------|--------------------------------------------------------------------------------------------------------------------------|-------|----|-----|
| A_33_P3260125  | LDLRAD2        | Homo sapiens low density lipoprotein receptor class A domain containing 2 (LDLRAD2), mRNA [NM_001013693]                 | 4.256 | up | 256 |
| A_21_P0005196  | LOC101927902   | PREDICTED: Homo sapiens uncharacterized LOC101927902 (LOC101927902), ncRNA [XR_242326]                                   | 3.777 | up | 257 |
| A_21_P0010465  | lnc-APOBEC3F-1 | lncCipedia lincRNA (lnc-APOBEC3F-1), lincRNA [lnc-APOBEC3F-1:1]                                                          | 3.867 | up | 258 |
| A_23_P321160   | ZNF594         | Homo sapiens zinc finger protein 594 (ZNF594), mRNA [NM_032530]                                                          | 3.236 | up | 259 |
| A_33_P3327956  | ZNF605         | Homo sapiens zinc finger protein 605 (ZNF605), transcript variant 1, mRNA [NM_183238]                                    | 3.507 | up | 260 |
| A_21_P0008768  | LOC101929641   | PREDICTED: Homo sapiens uncharacterized LOC101929641 (LOC101929641), ncRNA [XR_243223]                                   | 4.158 | up | 261 |
| A_23_P201731   | TRAF5          | Homo sapiens TNF receptor-associated factor 5 (TRAF5), transcript variant 1, mRNA [NM_004619]                            | 6.152 | up | 262 |
| A_24_P710730   | SMA4           | Homo sapiens glucuronidase, beta pseudogene (SMA4), transcript variant 2, non-coding RNA [NR_024054]                     | 3.371 | up | 263 |
| A_23_P304511   | ZNF397         | Homo sapiens zinc finger protein 397 (ZNF397), transcript variant 2, mRNA [NM_032347]                                    | 3.951 | up | 264 |
| A_23_P434430   | ZNF439         | Homo sapiens zinc finger protein 439 (ZNF439), mRNA [NM_152262]                                                          | 5.647 | up | 265 |
| A_23_P22672    | ALG13          | Homo sapiens ALG13, UDP-N-acetylglucosaminyltransferase subunit (ALG13), transcript variant 7, mRNA [NM_001257231]       | 3.239 | up | 266 |
| A_33_P3323218  | CARF           | Homo sapiens calcium responsive transcription factor (CARF), transcript variant 2, mRNA [NM_024744]                      | 3.553 | up | 267 |
| A_24_P363087   | C5orf45        | Homo sapiens chromosome 5 open reading frame 45 (C5orf45), transcript variant 1, mRNA [NM_016175]                        | 3.156 | up | 268 |
| A_24_P168398   | ZNF177         | Homo sapiens zinc finger protein 177 (ZNF177), transcript variant 3, mRNA [NM_003451]                                    | 8.146 | up | 269 |
| A_23_P416751   | ZNF610         | Homo sapiens zinc finger protein 610 (ZNF610), transcript variant 3, mRNA [NM_173530]                                    | 4.020 | up | 270 |
| A_23_P250245   | CD72           | Homo sapiens CD72 molecule (CD72), mRNA [NM_001782]                                                                      | 4.453 | up | 271 |
| A_23_P356139   | FAM178A        | Homo sapiens family with sequence similarity 178, member A (FAM178A), transcript variant 1, mRNA [NM_018121]             | 3.340 | up | 272 |
| A_33_P3420204  | CRTC1          | Homo sapiens CREB regulated transcription coactivator 1 (CRTC1), transcript variant 3, mRNA [NM_001098482]               | 3.300 | up | 273 |
| A_21_P0007489  | LOC100507616   | PREDICTED: Homo sapiens uncharacterized LOC100507616 (LOC100507616), transcript variant X1, ncRNA [XR_110328]            | 5.104 | up | 274 |
| A_32_P356316   | HLA-DOA        | Homo sapiens major histocompatibility complex, class II, DO alpha (HLA-DOA), mRNA [NM_002119]                            | 3.902 | up | 275 |
| A_23_P251705   | ARHGEF9        | Homo sapiens Cdc42 guanine nucleotide exchange factor (GEF) 9 (ARHGEF9), transcript variant 1, mRNA [NM_015185]          | 3.230 | up | 276 |
| A_24_P344961   | AMOT           | Homo sapiens angiomin (AMOT), transcript variant 2, mRNA [NM_133265]                                                     | 4.503 | up | 277 |
| A_33_P3311917  | na             | Q6JH27_HUMAN (Q6JH27) HCV-NS5ATP5 binding protein 1, partial (29%) [THC2537043]                                          | 3.571 | up | 278 |
| A_23_P110288   | GSTCD          | Homo sapiens glutathione S-transferase, C-terminal domain containing (GSTCD), transcript variant 2, mRNA [NM_024751]     | 3.857 | up | 279 |
| A_23_P501435   | CSRP2BP        | Homo sapiens CSRP2 binding protein (CSRP2BP), transcript variant 1, mRNA [NM_020536]                                     | 3.620 | up | 280 |
| A_32_P396186   | TRIM66         | Homo sapiens tripartite motif containing 66 (TRIM66), mRNA [NM_014818]                                                   | 3.644 | up | 281 |
| A_23_P418431   | C6orf164       | Homo sapiens chromosome 6 open reading frame 164 (C6orf164), long non-coding RNA [NR_026784]                             | 3.488 | up | 282 |
| A_24_P807031   | ATP6AP1L       | Homo sapiens ATPase, H+ transporting, lysosomal accessory protein 1-like (ATP6AP1L), mRNA [NM_001017971]                 | 4.119 | up | 283 |
| A_23_P52082    | INTS7          | Homo sapiens integrator complex subunit 7 (INTS7), transcript variant 1, mRNA [NM_015434]                                | 4.605 | up | 284 |
| A_33_P3321657  | HSPG2          | Homo sapiens heparan sulfate proteoglycan 2 (HSPG2), transcript variant 1, mRNA [NM_001291860]                           | 3.109 | up | 285 |
| A_23_P50786    | CLIP3          | Homo sapiens CAP-GLY domain containing linker protein 3 (CLIP3), transcript variant 2, mRNA [NM_015526]                  | 4.295 | up | 286 |
| A_23_P155857   | NUDT6          | Homo sapiens nudix (nucleoside diphosphate linked moiety X)-type motif 6 (NUDT6), transcript variant 2, mRNA [NM_198041] | 6.013 | up | 287 |
| A_33_P3241786  | ADD2           | Homo sapiens adducin 2 (beta) (ADD2), transcript variant 2, mRNA [NM_017482]                                             | 5.772 | up | 288 |
| A_33_P3241782  | ADD2           | Homo sapiens adducin 2 (beta) (ADD2), transcript variant 1, mRNA [NM_001617]                                             | 4.248 | up | 289 |
| A_23_P159907   | MAGED4B        | Homo sapiens melanoma antigen family D, 4B (MAGED4B), transcript variant 1, mRNA [NM_030801]                             | 3.960 | up | 290 |
| A_19_P00810465 | KCNA6          | Homo sapiens potassium channel, voltage gated shaker related subfamily A, member 6 (KCNA6), mRNA [NM_002235]             | 3.199 | up | 291 |
| A_23_P111635   | STYXL1         | Homo sapiens serine/threonine/tyrosine interacting-like 1 (STYXL1), mRNA [NM_016086]                                     | 3.630 | up | 292 |
| A_24_P185604   | NDRG3          | Homo sapiens NDRG family member 3 (NDRG3), transcript variant 1, mRNA [NM_032013]                                        | 3.974 | up | 293 |
| A_32_P154223   | LINC01431      | Homo sapiens long intergenic non-protein coding RNA 1431 (LINC01431), long non-coding RNA [NR_109884]                    | 3.345 | up | 294 |
| A_32_P465742   | PIP5K1B        | Homo sapiens phosphatidylinositol-4-phosphate 5-kinase, type I, beta (PIP5K1B), transcript variant 2, mRNA [NM_003558]   | 8.084 | up | 295 |
| A_32_P211045   | DHFR           | Homo sapiens dihydrofolate reductase (DHFR), transcript variant 1, mRNA [NM_000791]                                      | 6.917 | up | 296 |
| A_23_P1676     | TMEM218        | Homo sapiens transmembrane protein 218 (TMEM218), transcript variant 1, mRNA [NM_001258243]                              | 9.116 | up | 297 |
| A_23_P217114   | ALAD           | Homo sapiens aminolevulinic acid dehydratase (ALAD), mRNA [NM_000031]                                                    | 3.427 | up | 298 |
| A_33_P3300092  | NDST1          | Homo sapiens N-deacetylase/N-sulfotransferase (heparan glucosaminyl) 1 (NDST1), transcript variant 1, mRNA [NM_001543]   | 4.819 | up | 299 |
| A_23_P401084   | ZNF575         | Homo sapiens zinc finger protein 575 (ZNF575), mRNA [NM_174945]                                                          | 5.194 | up | 300 |
| A_23_P146637   | SIGMAR1        | Homo sapiens sigma non-opioid intracellular receptor 1 (SIGMAR1), transcript variant 1, mRNA [NM_005866]                 | 5.066 | up | 301 |
| A_23_P115356   | AKR7A2         | Homo sapiens aldo-keto reductase family 7, member A2 (afatoxin aldehyde reductase) (AKR7A2), mRNA [NM_003689]            | 4.752 | up | 302 |
| A_23_P5731     | FAHD2A         | Homo sapiens fumarylacetoacetate hydrolase domain containing 2A (FAHD2A), mRNA [NM_016044]                               | 4.102 | up | 303 |
| A_23_P151075   | ARHGD1B        | Homo sapiens Rho GDP dissociation inhibitor (GDI) beta (ARHGD1B), mRNA [NM_001175]                                       | 3.158 | up | 304 |
| A_33_P3329467  | STYXL1         | Homo sapiens serine/threonine/tyrosine interacting-like 1 (STYXL1), mRNA [NM_016086]                                     | 4.149 | up | 305 |
| A_23_P258093   | AGPAT1         | Homo sapiens 1-acylglycerol-3-phosphate O-acyltransferase 1 (AGPAT1), transcript variant 1, mRNA [NM_006411]             | 3.165 | up | 306 |
| A_23_P124927   | RGS14          | Homo sapiens regulator of G-protein signaling 14 (RGS14), mRNA [NM_006480]                                               | 4.359 | up | 307 |
| A_23_P42746    | NCF1           | Homo sapiens neutrophil cytosolic factor 1 (NCF1), mRNA [NM_000265]                                                      | 3.257 | up | 308 |
| A_23_P91140    | PECR           | Homo sapiens peroxisomal trans-2-enoyl-CoA reductase (PECR), mRNA [NM_018441]                                            | 6.125 | up | 309 |
| A_33_P3337019  | LOC728975      | PREDICTED: Homo sapiens uncharacterized LOC728975 (LOC728975), misc_RNA [XR_247237]                                      | 4.550 | up | 310 |
| A_23_P71855    | C5             | Homo sapiens complement component 5 (C5), mRNA [NM_001735]                                                               | 3.238 | up | 311 |
| A_23_P61487    | LRRC20         | Homo sapiens leucine rich repeat containing 20 (LRRC20), transcript variant 3, mRNA [NM_018205]                          | 7.468 | up | 312 |
| A_24_P168416   | PRDX2          | Homo sapiens peroxiredoxin 2 (PRDX2), mRNA [NM_005809]                                                                   | 3.833 | up | 313 |
| A_23_P502654   | SHMT1          | Homo sapiens serine hydroxymethyltransferase 1 (soluble) (SHMT1), transcript variant 1, mRNA [NM_004169]                 | 4.491 | up | 314 |
| A_33_P3632937  | LOC100131262   | PREDICTED: Homo sapiens uncharacterized LOC100131262 (LOC100131262), misc_RNA [XR_132952]                                | 3.665 | up | 315 |
| A_33_P3337931  | na             | 0                                                                                                                        | 6.831 | up | 316 |
| A_33_P3843415  | WDR11-AS1      | Homo sapiens WDR11 antisense RNA 1 (WDR11-AS1), long non-coding RNA [NR_033850]                                          | 4.817 | up | 317 |
| A_32_P216548   | LDLRAP1        | Homo sapiens low density lipoprotein receptor adaptor protein 1 (LDLRAP1), mRNA [NM_015627]                              | 3.328 | up | 318 |

|                |              |                                                                                                                                                                                  |        |    |     |
|----------------|--------------|----------------------------------------------------------------------------------------------------------------------------------------------------------------------------------|--------|----|-----|
| A_23_P258221   | ABCC5        | Homo sapiens ATP-binding cassette, sub-family C (CFTR/MRP), member 5 (ABCC5), transcript variant 1, mRNA [NM_005688]                                                             | 5.243  | up | 319 |
| A_33_P3317948  | TP73-AS1     | Homo sapiens TP73 antisense RNA 1 (TP73-AS1), transcript variant 1, long non-coding RNA [NR_033711]                                                                              | 4.382  | up | 320 |
| A_23_P76529    | ITGB7        | Homo sapiens integrin, beta 7 (ITGB7), transcript variant 1, mRNA [NM_000889]                                                                                                    | 3.579  | up | 321 |
| A_19_P00320723 | SRP14-AS1    | Homo sapiens SRP14 antisense RNA1 (head to head) (SRP14-AS1), transcript variant 1, long non-coding RNA [NR_040059]                                                              | 6.579  | up | 322 |
| A_33_P3298062  | ABCC5        | Homo sapiens ATP-binding cassette, sub-family C (CFTR/MRP), member 5 (ABCC5), transcript variant 2, mRNA [NM_001023587]                                                          | 10.762 | up | 323 |
| A_23_P170978   | ZNF692       | Homo sapiens zinc finger protein 692 (ZNF692), transcript variant 2, mRNA [NM_017865]                                                                                            | 4.191  | up | 324 |
| A_23_P397543   | LINC00174    | Homo sapiens long intergenic non-protein coding RNA 174 (LINC00174), long non-coding RNA [NR_026873]                                                                             | 5.221  | up | 325 |
| A_33_P3212172  | SNX22        | Homo sapiens sorting nexin 22 (SNX22), transcript variant 1, mRNA [NM_024798]                                                                                                    | 12.078 | up | 326 |
| A_32_P95914    | MMS22L       | Homo sapiens MMS22-like, DNA repair protein (MMS22L), mRNA [NM_198468]                                                                                                           | 6.498  | up | 327 |
| A_33_P3305482  | EIF2B3       | Homo sapiens eukaryotic translation initiation factor 2B, subunit 3 gamma, 58kDa (EIF2B3), transcript variant 1, mRNA [NM_020365]                                                | 5.174  | up | 328 |
| A_23_P92543    | SCFD2        | Homo sapiens sec1 family domain containing 2 (SCFD2), mRNA [NM_152540]                                                                                                           | 3.300  | up | 329 |
| A_23_P2223     | MYL6B        | Homo sapiens myosin, light chain 6B, alkali, smooth muscle and non-muscle (MYL6B), transcript variant 2, mRNA [NM_002475]                                                        | 3.432  | up | 330 |
| A_33_P3405334  | GM2A         | Homo sapiens GM2 ganglioside activator (GM2A), transcript variant 1, mRNA [NM_000405]                                                                                            | 5.418  | up | 331 |
| A_23_P29836    | TMEM42       | transmembrane protein 42 [Source:HGNC Symbol;Acc:HGNC:28444] [ENST00000477126]                                                                                                   | 3.771  | up | 332 |
| A_23_P160992   | FMO4         | Homo sapiens flavin containing monoxygenase 4 (FMO4), mRNA [NM_002022]                                                                                                           | 7.359  | up | 333 |
| A_33_P3336422  | ZBED5-AS1    | Homo sapiens ZBED5 antisense RNA 1 (ZBED5-AS1), long non-coding RNA [NR_034137]                                                                                                  | 5.761  | up | 334 |
| A_33_P3415211  | MPV17        | Homo sapiens MpV17 mitochondrial inner membrane protein (MPV17), mRNA [NM_002437]                                                                                                | 3.322  | up | 335 |
| A_33_P3357087  | MPV17        | Homo sapiens MpV17 mitochondrial inner membrane protein (MPV17), mRNA [NM_002437]                                                                                                | 3.548  | up | 336 |
| A_33_P3388312  | SKAP2        | src kinase associated phosphoprotein 2 [Source:HGNC Symbol;Acc:HGNC:15687] [ENST00000345317]                                                                                     | 6.037  | up | 337 |
| A_24_P89843    | CYHR1        | Homo sapiens cysteine/histidine-rich 1 (CYHR1), transcript variant 2, mRNA [NM_032687]                                                                                           | 4.398  | up | 338 |
| A_23_P1775     | DPAGT1       | Homo sapiens dolichyl-phosphate (UDP-N-acetylglucosamine) N-acetylglucosaminophosphotransferase 1 (GlcNAc-1-P transferase) (DPAGT1), mRNA [NM_001382]                            | 4.625  | up | 339 |
| A_23_P105409   | MAP3K12      | Homo sapiens mitogen-activated protein kinase kinase kinase 12 (MAP3K12), transcript variant 2, mRNA [NM_006301]                                                                 | 3.467  | up | 340 |
| A_33_P3252794  | GLI4         | Homo sapiens GLI family zinc finger 4 (GLI4), mRNA [NM_138465]                                                                                                                   | 3.314  | up | 341 |
| A_23_P64828    | OAS1         | Homo sapiens 2'-5'-oligoadenylate synthetase 1, 40/46kDa (OAS1), transcript variant 2, mRNA [NM_002534]                                                                          | 6.161  | up | 342 |
| A_23_P148807   | CDC7         | Homo sapiens cell division cycle 7 (CDC7), transcript variant 1, mRNA [NM_003503]                                                                                                | 4.570  | up | 343 |
| A_21_P0011476  | CHEK2        | Homo sapiens checkpoint kinase 2 (CHEK2), transcript variant 3, mRNA [NM_001005735]                                                                                              | 5.260  | up | 344 |
| A_23_P117494   | MTHFD1       | Homo sapiens methylenetetrahydrofolate dehydrogenase (NADP+ dependent) 1, methylenetetrahydrofolate cyclohydrolase, formyltetrahydrofolate synthetase (MTHFD1), mRNA [NM_005956] | 3.607  | up | 345 |
| A_21_P0008517  | LOC100506476 | Homo sapiens uncharacterized LOC100506476 (LOC100506476), long non-coding RNA [NR_109995]                                                                                        | 4.436  | up | 346 |
| A_21_P0014231  | lnc-WDR34-1  | LNCipedia lincRNA (lnc-WDR34-1), lincRNA [lnc-WDR34-1:1]                                                                                                                         | 3.372  | up | 347 |
| A_24_P405205   | ATP2B4       | Homo sapiens ATPase, Ca++ transporting, plasma membrane 4 (ATP2B4), transcript variant 1, mRNA [NM_001001396]                                                                    | 3.631  | up | 348 |
| A_23_P64898    | KLRG1        | Homo sapiens killer cell lectin-like receptor subfamily G, member 1 (KLRG1), mRNA [NM_005810]                                                                                    | 4.193  | up | 349 |
| A_21_P0014077  | LOC100505666 | Homo sapiens uncharacterized LOC100505666 (LOC100505666), transcript variant 1, long non-coding RNA [NR_040772]                                                                  | 3.115  | up | 350 |
| A_24_P355493   | LHPP         | Homo sapiens phospholysine phosphohistidine inorganic pyrophosphate phosphatase (LHPP), transcript variant 1, mRNA [NM_022126]                                                   | 3.251  | up | 351 |
| A_23_P24616    | SIAE         | Homo sapiens sialic acid acetyltransferase (SIAE), transcript variant 1, mRNA [NM_170601]                                                                                        | 3.459  | up | 352 |
| A_24_P212539   | GALM         | Homo sapiens galactose mutarotase (aldose 1-epimerase) (GALM), mRNA [NM_138801]                                                                                                  | 3.121  | up | 353 |
| A_33_P3273436  | GALM         | Homo sapiens galactose mutarotase (aldose 1-epimerase) (GALM), mRNA [NM_138801]                                                                                                  | 3.194  | up | 354 |
| A_23_P210015   | PTPN18       | Homo sapiens protein tyrosine phosphatase, non-receptor type 18 (brain-derived) (PTPN18), transcript variant 1, mRNA [NM_014369]                                                 | 3.454  | up | 355 |
| A_24_P306720   | FOXN3-AS1    | Homo sapiens FOXN3 antisense RNA 1 (FOXN3-AS1), long non-coding RNA [NR_036500]                                                                                                  | 3.502  | up | 356 |
| A_24_P139943   | HS1BP3       | Homo sapiens HCLS1 binding protein 3 (HS1BP3), mRNA [NM_022460]                                                                                                                  | 3.167  | up | 357 |
| A_23_P130515   | CEACAM3      | Homo sapiens carcinoembryonic antigen-related cell adhesion molecule 3 (CEACAM3), transcript variant 1, mRNA [NM_001815]                                                         | 3.845  | up | 358 |
| A_23_P148473   | IL2RG        | Homo sapiens interleukin 2 receptor, gamma (IL2RG), mRNA [NM_000206]                                                                                                             | 3.179  | up | 359 |
| A_33_P3396607  | UGDH         | Homo sapiens UDP-glucose 6-dehydrogenase (UGDH), transcript variant 1, mRNA [NM_003359]                                                                                          | 5.443  | up | 360 |
| A_33_P3327822  | SH3BGR       | Homo sapiens SH3 domain binding glutamate-rich protein (SH3BGR), transcript variant 1, mRNA [NM_007341]                                                                          | 3.274  | up | 361 |
| A_21_P0006453  | lnc-ZMYM3-1  | LNCipedia lincRNA (lnc-ZMYM3-1), lincRNA [lnc-ZMYM3-1:1]                                                                                                                         | 4.017  | up | 362 |
| A_23_P139396   | C11orf73     | Homo sapiens chromosome 11 open reading frame 73 (C11orf73), transcript variant 1, mRNA [NM_016401]                                                                              | 3.742  | up | 363 |
| A_23_P134714   | HRSP12       | Homo sapiens heat-responsive protein 12 (HRSP12), mRNA [NM_005836]                                                                                                               | 5.662  | up | 364 |
| A_33_P3232544  | na           | 0                                                                                                                                                                                | 3.270  | up | 365 |
| A_23_P256413   | CMTM7        | Homo sapiens CKLF-like MARVEL transmembrane domain containing 7 (CMTM7), transcript variant 1, mRNA [NM_138410]                                                                  | 3.134  | up | 366 |
| A_23_P402319   | GAPT         | GRB2-binding adaptor protein, transmembrane [Source:HGNC Symbol;Acc:HGNC:26588] [ENST00000318469]                                                                                | 3.850  | up | 367 |
| A_33_P3282489  | GCNT1        | Homo sapiens glucosaminyl (N-acetyl) transferase 1, core 2 (GCNT1), transcript variant 1, mRNA [NM_001097634]                                                                    | 4.942  | up | 368 |
| A_23_P98565    | MS4A14       | Homo sapiens membrane-spanning 4-domains, subfamily A, member 14 (MS4A14), transcript variant 1, mRNA [NM_032597]                                                                | 5.130  | up | 369 |
| A_23_P322756   | TET1         | Homo sapiens tet methylcytosine dioxygenase 1 (TET1), mRNA [NM_030625]                                                                                                           | 3.387  | up | 370 |
| A_33_P3308332  | PLEKHB1      | Homo sapiens pleckstrin homology domain containing, family B (evectins) member 1 (PLEKHB1), transcript variant 1, mRNA [NM_021200]                                               | 5.359  | up | 371 |
| A_32_P224522   | SLC25A23     | Homo sapiens solute carrier family 25 (mitochondrial carrier; phosphate carrier), member 23 (SLC25A23), mRNA [NM_024103]                                                         | 4.070  | up | 372 |
| A_23_P20427    | RHOBTB2      | Homo sapiens Rho-related BTB domain containing 2 (RHOBTB2), transcript variant 3, mRNA [NM_015178]                                                                               | 5.691  | up | 373 |
| A_23_P375922   | COL19A1      | Homo sapiens collagen, type XIX, alpha 1 (COL19A1), mRNA [NM_001858]                                                                                                             | 3.951  | up | 374 |
| A_21_P0009429  | lnc-NEDD4L-2 | Homo sapiens cDNA FLJ45655 fis, clone CTONG2012425. [AK127562]                                                                                                                   | 3.445  | up | 375 |
| A_32_P167705   | AGBL2        | Homo sapiens ATP/GTP binding protein-like 2 (AGBL2), mRNA [NM_024783]                                                                                                            | 4.125  | up | 376 |
| A_24_P211565   | C1QTNF6      | Homo sapiens C1q and tumor necrosis factor related protein 6 (C1QTNF6), transcript variant 1, mRNA [NM_031910]                                                                   | 3.487  | up | 377 |
| A_33_P3408938  | LILRP2       | Homo sapiens leukocyte immunoglobulin-like receptor pseudogene 2 (LILRP2), non-coding RNA [NR_003061]                                                                            | 4.201  | up | 378 |
| A_24_P157370   | IL17RB       | Homo sapiens interleukin 17 receptor B (IL17RB), mRNA [NM_018725]                                                                                                                | 4.447  | up | 379 |
| A_24_P13083    | TSPAN18      | Homo sapiens tetraspanin 18 (TSPAN18), mRNA [NM_130783]                                                                                                                          | 3.167  | up | 380 |
| A_33_P3413038  | PLXNB3       | Homo sapiens plexin B3 (PLXNB3), transcript variant 2, mRNA [NM_001163257]                                                                                                       | 3.116  | up | 381 |

|                |                |                                                                                                                                        |       |    |     |
|----------------|----------------|----------------------------------------------------------------------------------------------------------------------------------------|-------|----|-----|
| A_19_P00318174 | LOC100506014   | 0                                                                                                                                      | 3.110 | up | 382 |
| A_19_P00802098 | LOC100506014   | 0                                                                                                                                      | 3.989 | up | 383 |
| A_33_P3367112  | Inc-SIRT4-1    | 602713021F1 NIH_MGC_48 Homo sapiens cDNA clone IMAGE:4853452 5', mRNA sequence [BG758909]                                              | 3.296 | up | 384 |
| A_19_P00322432 | LOC100506014   | 0                                                                                                                                      | 3.231 | up | 385 |
| A_19_P00316666 | LOC100506014   | 0                                                                                                                                      | 3.359 | up | 386 |
| A_21_P0007481  | LINC00944      | Homo sapiens long intergenic non-protein coding RNA 944 (LINC00944), long non-coding RNA [NR_033878]                                   | 3.629 | up | 387 |
| A_23_P9255     | SYK            | Homo sapiens spleen tyrosine kinase (SYK), transcript variant 1, mRNA [NM_003177]                                                      | 4.092 | up | 388 |
| A_21_P0000642  | LINC00959      | Homo sapiens long intergenic non-protein coding RNA 959 (LINC00959), long non-coding RNA [NR_034125]                                   | 3.357 | up | 389 |
| A_21_P0000641  | LINC00959      | Homo sapiens long intergenic non-protein coding RNA 959 (LINC00959), long non-coding RNA [NR_034125]                                   | 3.220 | up | 390 |
| A_23_P20852    | AUH            | Homo sapiens AU RNA binding protein/enoyl-CoA hydratase (AUH), mRNA [NM_001698]                                                        | 3.760 | up | 391 |
| A_21_P0013825  | STAU2          | Homo sapiens staufen double-stranded RNA binding protein 2 (STAU2), transcript variant 1, mRNA [NM_001164380]                          | 3.103 | up | 392 |
| A_23_P364766   | SLX4IP         | Homo sapiens SLX4 interacting protein (SLX4IP), mRNA [NM_001009608]                                                                    | 6.415 | up | 393 |
| A_21_P0000893  | IQCH-AS1       | Homo sapiens IQCH antisense RNA 1 (IQCH-AS1), transcript variant 1, long non-coding RNA [NR_040051]                                    | 7.245 | up | 394 |
| A_24_P143686   | SPIDR          | Homo sapiens scaffolding protein involved in DNA repair (SPIDR), transcript variant 1, mRNA [NM_001080394]                             | 3.390 | up | 395 |
| A_23_P48771    | C14orf159      | Homo sapiens chromosome 14 open reading frame 159 (C14orf159), transcript variant 3, mRNA [NM_024952]                                  | 4.827 | up | 396 |
| A_23_P30069    | DDX60L         | Homo sapiens DEAD (Asp-Glu-Ala-Asp) box polypeptide 60-like (DDX60L), transcript variant 1, mRNA [NM_001012967]                        | 4.454 | up | 397 |
| A_23_P258251   | ENOX2          | Homo sapiens ecto-NOX disulfide-thiol exchanger 2 (ENOX2), transcript variant 2, mRNA [NM_182314]                                      | 3.714 | up | 398 |
| A_23_P93499    | TFB1M          | Homo sapiens transcription factor B1, mitochondrial (TFB1M), mRNA [NM_016020]                                                          | 4.198 | up | 399 |
| A_33_P3214456  | PDSS2          | Homo sapiens prenyl (decaprenyl) diphosphate synthase, subunit 2 (PDSS2), mRNA [NM_020381]                                             | 3.909 | up | 400 |
| A_23_P134167   | PDSS2          | Homo sapiens prenyl (decaprenyl) diphosphate synthase, subunit 2 (PDSS2), mRNA [NM_020381]                                             | 5.249 | up | 401 |
| A_23_P382043   | NT5DC1         | Homo sapiens 5'-nucleotidase domain containing 1 (NT5DC1), mRNA [NM_152729]                                                            | 3.295 | up | 402 |
| A_33_P3324904  | na             | 0                                                                                                                                      | 3.236 | up | 403 |
| A_23_P401700   | APBB1IP        | Homo sapiens amyloid beta (A4) precursor protein-binding, family B, member 1 interacting protein (APBB1IP), mRNA [NM_019043]           | 4.277 | up | 404 |
| A_24_P32520    | RNF214         | Homo sapiens ring finger protein 214 (RNF214), transcript variant 1, mRNA [NM_001077239]                                               | 3.271 | up | 405 |
| A_23_P55948    | PRR12          | Homo sapiens proline rich 12 (PRR12), mRNA [NM_020719]                                                                                 | 3.114 | up | 406 |
| A_24_P379512   | PIGK           | Homo sapiens phosphatidylinositol glycan anchor biosynthesis, class K (PIGK), mRNA [NM_005482]                                         | 4.943 | up | 407 |
| A_24_P759674   | OBFC1          | Homo sapiens oligonucleotide/oligosaccharide-binding fold containing 1 (OBFC1), mRNA [NM_024928]                                       | 3.204 | up | 408 |
| A_24_P45451    | SLAMF6         | Homo sapiens SLAM family member 6 (SLAMF6), transcript variant 2, mRNA [NM_052931]                                                     | 4.857 | up | 409 |
| A_33_P3303857  | SLAMF6         | Homo sapiens SLAM family member 6 (SLAMF6), transcript variant 1, mRNA [NM_001184714]                                                  | 4.605 | up | 410 |
| A_23_P201319   | DISP1          | Homo sapiens dispatched homolog 1 (Drosophila) (DISP1), mRNA [NM_032890]                                                               | 5.283 | up | 411 |
| A_23_P133075   | TBCK           | Homo sapiens TBC1 domain containing kinase (TBCK), transcript variant 4, mRNA [NM_033115]                                              | 3.324 | up | 412 |
| A_23_P433369   | HEATR5A        | Homo sapiens HEAT repeat containing 5A (HEATR5A), mRNA [NM_015473]                                                                     | 4.292 | up | 413 |
| A_23_P412186   | ZNF252P        | Homo sapiens zinc finger protein 252, pseudogene (ZNF252P), non-coding RNA [NR_023392]                                                 | 4.083 | up | 414 |
| A_23_P156390   | JAKMIP2        | Homo sapiens janus kinase and microtubule interacting protein 2 (JAKMIP2), transcript variant 3, mRNA [NM_014790]                      | 5.589 | up | 415 |
| A_33_P3255290  | JAKMIP2        | Homo sapiens janus kinase and microtubule interacting protein 2 (JAKMIP2), transcript variant 3, mRNA [NM_014790]                      | 4.560 | up | 416 |
| A_21_P0004864  | na             | PREDICTED: Homo sapiens uncharacterized LOC102724851 (LOC102724851), transcript variant X1, ncRNA [XR_427900]                          | 5.428 | up | 417 |
| A_21_P0004862  | LOC102724851   | PREDICTED: Homo sapiens uncharacterized LOC102724851 (LOC102724851), transcript variant X2, ncRNA [XR_427901]                          | 3.922 | up | 418 |
| A_33_P3272090  | PDE4DIP        | Homo sapiens phosphodiesterase 4D interacting protein (PDE4DIP), transcript variant 1, mRNA [NM_014644]                                | 3.364 | up | 419 |
| A_23_P205913   | SLC24A1        | Homo sapiens solute carrier family 24 (sodium/potassium/calcium exchanger), member 1 (SLC24A1), transcript variant 1, mRNA [NM_004727] | 3.435 | up | 420 |
| A_23_P126605   | TMOD4          | Homo sapiens tropomodulin 4 (muscle) (TMOD4), mRNA [NM_013353]                                                                         | 3.336 | up | 421 |
| A_33_P3251332  | HEATR5A        | Homo sapiens HEAT repeat containing 5A (HEATR5A), mRNA [NM_015473]                                                                     | 4.693 | up | 422 |
| A_21_P0010661  | XLOC_I2_001196 | BROAD Institute lincRNA (XLOC_I2_001196), lincRNA [TCONS_I2_00001624]                                                                  | 3.220 | up | 423 |
| A_24_P860797   | PAIP2B         | Homo sapiens poly(A) binding protein interacting protein 2B (PAIP2B), mRNA [NM_020459]                                                 | 6.717 | up | 424 |
| A_23_P133279   | FAM173B        | Homo sapiens family with sequence similarity 173, member B (FAM173B), transcript variant 1, mRNA [NM_199133]                           | 5.741 | up | 425 |
| A_33_P3384078  | AK9            | Homo sapiens cDNA FLJ16163 fis, clone BRCAN2014229. [AK131244]                                                                         | 4.356 | up | 426 |
| A_24_P678418   | DICER1-AS1     | Homo sapiens DICER1 antisense RNA 1 (DICER1-AS1), long non-coding RNA [NR_015415]                                                      | 5.360 | up | 427 |
| A_23_P356526   | TRIM5          | Homo sapiens tripartite motif containing 5 (TRIM5), transcript variant gamma, mRNA [NM_033092]                                         | 4.729 | up | 428 |
| A_24_P141629   | FAM111A        | Homo sapiens family with sequence similarity 111, member A (FAM111A), transcript variant 1, mRNA [NM_022074]                           | 4.393 | up | 429 |
| A_33_P3341616  | GVINP1         | Homo sapiens GTPase, very large interferon inducible pseudogene 1 (GVINP1), non-coding RNA [NR_003945]                                 | 5.417 | up | 430 |
| A_23_P384056   | CCDC14         | Homo sapiens coiled-coil domain containing 14 (CCDC14), mRNA [NM_022757]                                                               | 5.218 | up | 431 |
| A_33_P3394234  | ZNF133         | Homo sapiens zinc finger protein 133 (ZNF133), transcript variant 1, mRNA [NM_003434]                                                  | 4.354 | up | 432 |
| A_32_P209960   | CIITA          | Homo sapiens class II, major histocompatibility complex, transactivator (CIITA), transcript variant 2, mRNA [NM_000246]                | 5.437 | up | 433 |
| A_33_P3421351  | TRAF3IP3       | Homo sapiens TRAF3 interacting protein 3 (TRAF3IP3), transcript variant 2, mRNA [NM_001287754]                                         | 3.563 | up | 434 |
| A_33_P3336622  | ALDH3A2        | Homo sapiens aldehyde dehydrogenase 3 family, member A2 (ALDH3A2), transcript variant 1, mRNA [NM_001031806]                           | 4.037 | up | 435 |
| A_23_P55011    | SLC38A10       | Homo sapiens solute carrier family 38, member 10 (SLC38A10), transcript variant 1, mRNA [NM_001037984]                                 | 3.571 | up | 436 |
| A_23_P146111   | NIPAL2         | Homo sapiens NIPA-like domain containing 2 (NIPAL2), mRNA [NM_024759]                                                                  | 4.230 | up | 437 |
| A_33_P3398448  | PARP10         | Homo sapiens poly (ADP-ribose) polymerase family, member 10 (PARP10), mRNA [NM_032789]                                                 | 3.939 | up | 438 |
| A_23_P127367   | POLD4          | Homo sapiens polymerase (DNA-directed), delta 4, accessory subunit (POLD4), transcript variant 1, mRNA [NM_021173]                     | 3.225 | up | 439 |
| A_33_P3216955  | ANAPC16        | Homo sapiens anaphase promoting complex subunit 16 (ANAPC16), transcript variant 1, mRNA [NM_001242546]                                | 4.852 | up | 440 |
| A_24_P279797   | MRI1           | Homo sapiens methylthioribose-1-phosphate isomerase 1 (MRI1), transcript variant 1, mRNA [NM_001031727]                                | 4.936 | up | 441 |
| A_24_P329065   | BTN3A1         | Homo sapiens butyrophilin, subfamily 3, member A1 (BTN3A1), transcript variant 1, mRNA [NM_007048]                                     | 3.574 | up | 442 |
| A_24_P252078   | BTN3A2         | Homo sapiens butyrophilin, subfamily 3, member A2 (BTN3A2), transcript variant 1, mRNA [NM_007047]                                     | 4.132 | up | 443 |

|               |                   |                                                                                                                                          |       |    |     |
|---------------|-------------------|------------------------------------------------------------------------------------------------------------------------------------------|-------|----|-----|
| A_23_P155376  | CRELD1            | Homo sapiens cysteine-rich with EGF-like domains 1 (CRELD1), transcript variant 2, mRNA [NM_015513]                                      | 3.111 | up | 444 |
| A_23_P390172  | RNASEL            | Homo sapiens ribonuclease L (2',5'-oligoadenylate synthetase-dependent) (RNASEL), mRNA [NM_021133]                                       | 4.402 | up | 445 |
| A_32_P14610   | PDLIM5            | Homo sapiens PDZ and LIM domain 5 (PDLIM5), transcript variant 1, mRNA [NM_006457]                                                       | 4.654 | up | 446 |
| A_23_P369666  | ZMYND8            | zinc finger, MYND-type containing 8 [Source:HGNC Symbol;Acc:HGNC:9397] [ENST00000468376]                                                 | 3.159 | up | 447 |
| A_33_P3416881 | C2orf27A          | Homo sapiens chromosome 2 open reading frame 27A (C2orf27A), mRNA [NM_013310]                                                            | 4.206 | up | 448 |
| A_21_P0000682 | LHX4-AS1          | Homo sapiens LHX4 antisense RNA 1 (LHX4-AS1), long non-coding RNA [NR_037642]                                                            | 3.174 | up | 449 |
| A_23_P34644   | FCGR2B            | Homo sapiens Fc fragment of IgG, low affinity IIb, receptor (CD32) (FCGR2B), transcript variant 1, mRNA [NM_004001]                      | 4.806 | up | 450 |
| A_33_P3418170 | DDX58             | Homo sapiens DEAD (Asp-Glu-Ala-Asp) box polypeptide 58 (DDX58), mRNA [NM_014314]                                                         | 3.339 | up | 451 |
| A_33_P3252499 | CFAP44            | Homo sapiens cilia and flagella associated protein 44 (CFAP44), transcript variant 1, mRNA [NM_001164496]                                | 3.228 | up | 452 |
| A_32_P213661  | CCDC122           | Homo sapiens coiled-coil domain containing 122 (CCDC122), mRNA [NM_144974]                                                               | 3.689 | up | 453 |
| A_23_P501877  | ZFP64             | Homo sapiens ZFP64 zinc finger protein (ZFP64), transcript variant 1, mRNA [NM_018197]                                                   | 3.524 | up | 454 |
| A_33_P3317880 | ZNF252P           | Homo sapiens zinc finger protein 252, pseudogene (ZNF252P), non-coding RNA [NR_023392]                                                   | 4.553 | up | 455 |
| A_23_P82047   | STXBP5            | Homo sapiens syntaxin binding protein 5 (tomosyn) (STXBP5), transcript variant 2, mRNA [NM_001127715]                                    | 3.101 | up | 456 |
| A_23_P425304  | SUFU              | Homo sapiens suppressor of fused homolog (Drosophila) (SUFU), transcript variant 1, mRNA [NM_016169]                                     | 3.413 | up | 457 |
| A_33_P3369058 | LRRK2             | Homo sapiens leucine-rich repeat kinase 2 (LRRK2), mRNA [NM_198578]                                                                      | 4.240 | up | 458 |
| A_21_P0000049 | DISC1             | Homo sapiens disrupted in schizophrenia 1 (DISC1), transcript variant b, mRNA [NM_001164538]                                             | 3.451 | up | 459 |
| A_23_P336198  | GLCC1             | Homo sapiens glucocorticoid induced transcript 1 (GLCC1), mRNA [NM_138426]                                                               | 4.648 | up | 460 |
| A_21_P0014183 | LOC100505921      | Homo sapiens uncharacterized LOC100505921 (LOC100505921), long non-coding RNA [NR_110018]                                                | 3.408 | up | 461 |
| A_33_P3253687 | GVINP1            | Homo sapiens GTPase, very large interferon inducible pseudogene 1 (GVINP1), non-coding RNA [NR_003945]                                   | 6.823 | up | 462 |
| A_24_P349196  | CCDC30            | Homo sapiens coiled-coil domain containing 30 (CCDC30), mRNA [NM_001080850]                                                              | 4.552 | up | 463 |
| A_23_P381714  | CA13              | Homo sapiens carbonic anhydrase XIII (CA13), mRNA [NM_198584]                                                                            | 5.394 | up | 464 |
| A_23_P78595   | CEACAM21          | Homo sapiens carcinoembryonic antigen-related cell adhesion molecule 21 (CEACAM21), transcript variant 2, mRNA [NM_033543]               | 3.124 | up | 465 |
| A_24_P945228  | CYP4V2            | Homo sapiens cytochrome P450, family 4, subfamily V, polypeptide 2 (CYP4V2), mRNA [NM_207352]                                            | 4.436 | up | 466 |
| A_33_P3219840 | ZNRD1-AS1         | Homo sapiens ZNRD1 antisense RNA 1 (ZNRD1-AS1), long non-coding RNA [NR_026751]                                                          | 3.762 | up | 467 |
| A_33_P3373348 | AFF3              | AF4/FMR2 family, member 3 [Source:HGNC Symbol;Acc:HGNC:6473] [ENST00000483600]                                                           | 3.155 | up | 468 |
| A_21_P0014736 | LOC100506538      | PREDICTED: Homo sapiens uncharacterized LOC100506538 (LOC100506538), ncRNA [XR_426345]                                                   | 3.112 | up | 469 |
| A_21_P0006615 | na                | 0                                                                                                                                        | 5.478 | up | 470 |
| A_33_P3268838 | CPEB1             | Homo sapiens cytoplasmic polyadenylation element binding protein 1 (CPEB1), transcript variant 5, mRNA [NM_001288819]                    | 3.309 | up | 471 |
| A_24_P712562  | C17orf67          | Homo sapiens chromosome 17 open reading frame 67 (C17orf67), mRNA [NM_001085430]                                                         | 3.304 | up | 472 |
| A_23_P382705  | TMTC2             | Homo sapiens transmembrane and tetratricopeptide repeat containing 2 (TMTC2), mRNA [NM_152588]                                           | 3.305 | up | 473 |
| A_23_P24716   | TMEM132A          | Homo sapiens transmembrane protein 132A (TMEM132A), transcript variant 1, mRNA [NM_017870]                                               | 3.857 | up | 474 |
| A_21_P0005688 | lnc-RP11-150012.5 | lncRNA [lnc-RP11-150012.5.1-2], lincRNA [lnc-RP11-150012.5.1-2:1]                                                                        | 4.168 | up | 475 |
| A_23_P109452  | CHEK2             | Homo sapiens checkpoint kinase 2 (CHEK2), transcript variant 3, mRNA [NM_001005735]                                                      | 3.781 | up | 476 |
| A_33_P3221999 | GSDMB             | Homo sapiens gasdermin B (GSDMB), transcript variant 3, mRNA [NM_001165958]                                                              | 3.211 | up | 477 |
| A_23_P153524  | C19orf73          | Homo sapiens chromosome 19 open reading frame 73 (C19orf73), mRNA [NM_018111]                                                            | 3.302 | up | 478 |
| A_33_P3335522 | FCRL5             | Homo sapiens Fc receptor-like 5 (FCRL5), transcript variant 2, mRNA [NM_001195388]                                                       | 3.174 | up | 479 |
| A_24_P290751  | DTX1              | Homo sapiens deltex 1, E3 ubiquitin ligase (DTX1), mRNA [NM_004416]                                                                      | 5.928 | up | 480 |
| A_23_P204998  | FARP1             | Homo sapiens FERM, RhoGEF (ARGGEF) and pleckstrin domain protein 1 (chondrocyte-derived) (FARP1), transcript variant 1, mRNA [NM_005766] | 3.297 | up | 481 |
| A_23_P71624   | PAX5              | Homo sapiens paired box 5 (PAX5), transcript variant 1, mRNA [NM_016734]                                                                 | 3.171 | up | 482 |
| A_23_P373464  | AFF3              | Homo sapiens AF4/FMR2 family, member 3 (AFF3), transcript variant 1, mRNA [NM_002285]                                                    | 3.252 | up | 483 |
| A_33_P3350259 | FAM129C           | Homo sapiens family with sequence similarity 129, member C (FAM129C), transcript variant 2, mRNA [NM_001098524]                          | 3.345 | up | 484 |
| A_23_P345799  | FAM129C           | Homo sapiens family with sequence similarity 129, member C (FAM129C), transcript variant 1, mRNA [NM_173544]                             | 3.534 | up | 485 |
| A_24_P206317  | HDAC9             | Homo sapiens histone deacetylase 9 (HDAC9), transcript variant 1, mRNA [NM_058176]                                                       | 4.792 | up | 486 |
| A_23_P404162  | HDAC9             | Homo sapiens histone deacetylase 9 (HDAC9), transcript variant 3, mRNA [NM_014707]                                                       | 3.916 | up | 487 |
| A_23_P303803  | C19orf18          | Homo sapiens chromosome 19 open reading frame 18 (C19orf18), mRNA [NM_152474]                                                            | 3.732 | up | 488 |
| A_21_P0011696 | LINC00665         | Homo sapiens long intergenic non-protein coding RNA 665 (LINC00665), transcript variant 2, long non-coding RNA [NR_038279]               | 4.408 | up | 489 |
| A_23_P214208  | CNR1              | Homo sapiens cannabinoid receptor 1 (brain) (CNR1), transcript variant 2, mRNA [NM_033181]                                               | 5.830 | up | 490 |
| A_23_P252155  | STRBP             | Homo sapiens spermatid perinuclear RNA binding protein (STRBP), transcript variant 1, mRNA [NM_018387]                                   | 3.272 | up | 491 |
| A_24_P64344   | BLNK              | Homo sapiens B-cell linker (BLNK), transcript variant 1, mRNA [NM_013314]                                                                | 5.093 | up | 492 |
| A_33_P3363637 | BLNK              | Homo sapiens B-cell linker (BLNK), transcript variant 1, mRNA [NM_013314]                                                                | 4.897 | up | 493 |
| A_23_P41194   | LRRC34            | Homo sapiens leucine rich repeat containing 34 (LRRC34), transcript variant 3, mRNA [NM_153353]                                          | 3.962 | up | 494 |
| A_21_P0000091 | LRRC34            | Homo sapiens leucine rich repeat containing 34 (LRRC34), transcript variant 1, mRNA [NM_001172780]                                       | 3.250 | up | 495 |
| A_33_P3406567 | MS4A1             | Homo sapiens membrane-spanning 4-domains, subfamily A, member 1 (MS4A1), transcript variant 1, mRNA [NM_152866]                          | 3.723 | up | 496 |
| A_23_P370830  | KLHL14            | Homo sapiens kelch-like family member 14 (KLHL14), mRNA [NM_020805]                                                                      | 3.278 | up | 497 |
| A_24_P694820  | lnc-ZNF236-1      | lncRNA [lnc-ZNF236-1], lincRNA [lnc-ZNF236-1:5]                                                                                          | 8.274 | up | 498 |
| A_23_P147245  | OSBPL10           | Homo sapiens oxysterol binding protein-like 10 (OSBPL10), transcript variant 1, mRNA [NM_017784]                                         | 3.552 | up | 499 |
| A_23_P312920  | POU2AF1           | Homo sapiens POU class 2 associating factor 1 (POU2AF1), mRNA [NM_006235]                                                                | 3.726 | up | 500 |
| A_33_P3335511 | FCRL5             | Homo sapiens Fc receptor-like 5 (FCRL5), transcript variant 2, mRNA [NM_001195388]                                                       | 5.250 | up | 501 |
| A_21_P0010658 | FCRL5             | Homo sapiens Fc receptor-like 5 (FCRL5), transcript variant 2, mRNA [NM_001195388]                                                       | 4.522 | up | 502 |
| A_33_P3335525 | FCRL5             | Fc receptor-like 5 [Source:HGNC Symbol;Acc:HGNC:18508] [ENST00000368189]                                                                 | 4.960 | up | 503 |
| A_33_P3335506 | FCRL5             | Fc receptor-like 5 [Source:HGNC Symbol;Acc:HGNC:18508] [ENST00000368190]                                                                 | 5.355 | up | 504 |
| A_23_P201211  | FCRL5             | Homo sapiens Fc receptor-like 5 (FCRL5), transcript variant 1, mRNA [NM_031281]                                                          | 6.043 | up | 505 |
| A_21_P0010993 | LOC101929174      | PREDICTED: Homo sapiens uncharacterized LOC101929174 (LOC101929174), ncRNA [XR_424270]                                                   | 4.341 | up | 506 |
| A_21_P0010991 | LOC101929174      | PREDICTED: Homo sapiens uncharacterized LOC101929174 (LOC101929174), ncRNA [XR_424270]                                                   | 3.575 | up | 507 |
| A_21_P0000840 | PXN-AS1           | Homo sapiens PXN antisense RNA 1 (PXN-AS1), long non-coding RNA [NR_038924]                                                              | 3.780 | up | 508 |

|                |                    |                                                                                                                                          |        |    |     |
|----------------|--------------------|------------------------------------------------------------------------------------------------------------------------------------------|--------|----|-----|
| A_33_P3340655  | KLHL32             | Homo sapiens kelch-like family member 32 (KLHL32), transcript variant 1, mRNA [NM_052904]                                                | 3.354  | up | 509 |
| A_24_P374634   | STAU2              | Homo sapiens staufen double-stranded RNA binding protein 2 (STAU2), transcript variant 1, mRNA [NM_001164380]                            | 3.296  | up | 510 |
| A_23_P82351    | BBS9               | Homo sapiens Bardet-Biedl syndrome 9 (BBS9), transcript variant 2, mRNA [NM_198428]                                                      | 3.319  | up | 511 |
| A_33_P3234764  | na                 | Homo sapiens cDNA FLJ27410 fis, clone WMC04875. [AK130920]                                                                               | 3.250  | up | 512 |
| A_21_P0010989  | XLOC_I2_002433     | BROAD Institute lincRNA (XLOC_I2_002433), lincRNA [TCONS_I2_00004704]                                                                    | 3.238  | up | 513 |
| A_23_P143981   | FBLN2              | Homo sapiens fibulin 2 (FBLN2), transcript variant 1, mRNA [NM_001004019]                                                                | 4.990  | up | 514 |
| A_23_P21495    | FCGBP              | Homo sapiens Fc fragment of IgG binding protein (FCGBP), mRNA [NM_003890]                                                                | 4.944  | up | 515 |
| A_23_P98645    | DCHS1              | Homo sapiens dachshous cadherin-related 1 (DCHS1), mRNA [NM_003737]                                                                      | 3.800  | up | 516 |
| A_23_P110941   | GSTA4              | Homo sapiens glutathione S-transferase alpha 4 (GSTA4), mRNA [NM_001512]                                                                 | 4.308  | up | 517 |
| A_33_P3257903  | GSTA4              | Homo sapiens glutathione S-transferase alpha 4 (GSTA4), mRNA [NM_001512]                                                                 | 5.687  | up | 518 |
| A_24_P178631   | na                 | Homo sapiens cDNA FLJ14761 fis, clone NT2RP3003302. [AK027667]                                                                           | 5.086  | up | 519 |
| A_24_P149124   | NREP               | Homo sapiens neuronal regeneration related protein (NREP), transcript variant 1, mRNA [NM_004772]                                        | 7.061  | up | 520 |
| A_33_P3391290  | NREP               | Homo sapiens neuronal regeneration related protein (NREP), transcript variant 11, mRNA [NM_001142483]                                    | 6.475  | up | 521 |
| A_33_P3287907  | ZBED3-AS1          | Homo sapiens ZBED3 antisense RNA 1 (ZBED3-AS1), long non-coding RNA [NR_024398]                                                          | 4.519  | up | 522 |
| A_21_P0004869  | LOC100131289       | Homo sapiens uncharacterized LOC100131289 (LOC100131289), long non-coding RNA [NR_038929]                                                | 11.701 | up | 523 |
| A_32_P74752    | LOC100131289       | Homo sapiens uncharacterized LOC100131289 (LOC100131289), long non-coding RNA [NR_038929]                                                | 8.340  | up | 524 |
| A_21_P0009669  | lnc-ZNF682-1       | LNCipedia lincRNA (lnc-ZNF682-1), lincRNA [lnc-ZNF682-1:1]                                                                               | 3.286  | up | 525 |
| A_33_P3213962  | OR13A1             | Homo sapiens olfactory receptor, family 13, subfamily A, member 1 (OR13A1), mRNA [NM_001004297]                                          | 6.106  | up | 526 |
| A_23_P328034   | C20orf96           | Homo sapiens chromosome 20 open reading frame 96 (C20orf96), transcript variant 1, mRNA [NM_153269]                                      | 3.494  | up | 527 |
| A_32_P68533    | FAM161A            | Homo sapiens family with sequence similarity 161, member A (FAM161A), transcript variant 2, mRNA [NM_032180]                             | 3.345  | up | 528 |
| A_24_P115007   | ALDH5A1            | Homo sapiens aldehyde dehydrogenase 5 family, member A1 (ALDH5A1), transcript variant 1, mRNA [NM_170740]                                | 3.786  | up | 529 |
| A_33_P3391275  | LINC00494          | Homo sapiens long intergenic non-protein coding RNA 494 (LINC00494), long non-coding RNA [NR_026958]                                     | 3.246  | up | 530 |
| A_33_P3256725  | PIP5K1B            | Homo sapiens phosphatidylinositol-4-phosphate 5-kinase, type I, beta (PIP5K1B), transcript variant 3, mRNA [NM_001278253]                | 8.483  | up | 531 |
| A_24_P349965   | TCF19              | Homo sapiens transcription factor 19 (TCF19), transcript variant 1, mRNA [NM_007109]                                                     | 4.533  | up | 532 |
| A_23_P31765    | PKIA               | Homo sapiens protein kinase (cAMP-dependent, catalytic) inhibitor alpha (PKIA), transcript variant 1, mRNA [NM_006823]                   | 3.599  | up | 533 |
| A_23_P316150   | IFT80              | Homo sapiens intraflagellar transport 80 (IFT80), transcript variant 1, mRNA [NM_020800]                                                 | 3.452  | up | 534 |
| A_24_P943613   | TBC1D1             | Homo sapiens TBC1 (tre-2/USP6, BUB2, cdc16) domain family, member 1 (TBC1D1), transcript variant 1, mRNA [NM_015173]                     | 3.482  | up | 535 |
| A_24_P365365   | TCF3               | Homo sapiens transcription factor 3 (TCF3), transcript variant 1, mRNA [NM_003200]                                                       | 3.286  | up | 536 |
| A_33_P3369844  | CD24               | Homo sapiens CD24 molecule (CD24), transcript variant 1, mRNA [NM_013230]                                                                | 4.024  | up | 537 |
| A_24_P941625   | ZNF70              | Homo sapiens zinc finger protein 70 (ZNF70), mRNA [NM_021916]                                                                            | 5.370  | up | 538 |
| A_23_P57417    | MMP11              | Homo sapiens matrix metalloproteinase 11 (stromelysin 3) (MMP11), mRNA [NM_005940]                                                       | 6.973  | up | 539 |
| A_32_P90483    | STXBP4             | Homo sapiens syntaxin binding protein 4 (STXBP4), mRNA [NM_178509]                                                                       | 3.469  | up | 540 |
| A_24_P284584   | ZNF559             | Homo sapiens zinc finger protein 559 (ZNF559), transcript variant 2, mRNA [NM_032497]                                                    | 3.940  | up | 541 |
| A_33_P3234989  | IFT81              | Homo sapiens intraflagellar transport 81 (IFT81), transcript variant 1, mRNA [NM_014055]                                                 | 6.803  | up | 542 |
| A_21_P0014472  | na                 | ALU1_HUMAN (P39188) Alu subfamily J sequence contamination warning entry, partial (13%) [THC2757892]                                     | 5.306  | up | 543 |
| A_23_P357717   | TCL1A              | Homo sapiens T-cell leukemia/lymphoma 1A (TCL1A), transcript variant 1, mRNA [NM_021966]                                                 | 7.591  | up | 544 |
| A_23_P125618   | GABRA3             | Homo sapiens gamma-aminobutyric acid (GABA) A receptor, alpha 3 (GABRA3), mRNA [NM_000808]                                               | 3.886  | up | 545 |
| A_19_P00806490 | TET1               | Homo sapiens tet methylcytosine dioxygenase 1 (TET1), mRNA [NM_030625]                                                                   | 4.225  | up | 546 |
| A_23_P38154    | FDXR               | Homo sapiens ferredoxin reductase (FDXR), transcript variant 2, mRNA [NM_004110]                                                         | 3.356  | up | 547 |
| A_21_P0014820  | na                 | endogenous retrovirus group K3, member 1 [Source:HGNC Symbol;Acc:HGNC:30466] [ENST00000413518]                                           | 3.857  | up | 548 |
| A_32_P175715   | MEIG1              | Homo sapiens meiosis/spermiogenesis associated 1 (MEIG1), mRNA [NM_001080836]                                                            | 4.969  | up | 549 |
| A_23_P212241   | CHL1               | Homo sapiens cell adhesion molecule L1-like (CHL1), transcript variant 1, mRNA [NM_006614]                                               | 8.090  | up | 550 |
| A_21_P0009109  | lnc-FAM65A-1       | LNCipedia lincRNA (lnc-FAM65A-1), lincRNA [lnc-FAM65A-1:1]                                                                               | 3.722  | up | 551 |
| A_21_P0010270  | na                 | 0                                                                                                                                        | 8.706  | up | 552 |
| A_21_P0010269  | lnc-AF165138.7.1-3 | LNCipedia lincRNA (lnc-AF165138.7.1-3), lincRNA [lnc-AF165138.7.1-3:2]                                                                   | 4.246  | up | 553 |
| A_33_P3273723  | na                 | Homo sapiens cDNA FLJ26029 fis, clone PNC05018. [AK129540]                                                                               | 3.124  | up | 554 |
| A_33_P3288824  | H2AFB3             | Homo sapiens H2A histone family, member B3 (H2AFB3), mRNA [NM_080720]                                                                    | 3.158  | up | 555 |
| A_21_P0013802  | TMLHE              | Homo sapiens trimethyllysine hydroxylase, epsilon (TMLHE), transcript variant 1, mRNA [NM_018196]                                        | 4.118  | up | 556 |
| A_23_P348281   | TCEANC2            | Homo sapiens transcription elongation factor A (SII) N-terminal and central domain containing 2 (TCEANC2), mRNA [NM_153035]              | 3.894  | up | 557 |
| A_21_P0013638  | KGFLP1             | Homo sapiens fibroblast growth factor 7 pseudogene (KGFLP1), transcript variant 1, non-coding RNA [NR_047527]                            | 4.959  | up | 558 |
| A_23_P10232    | BANK1              | Homo sapiens B-cell scaffold protein with ankyrin repeats 1 (BANK1), transcript variant 1, mRNA [NM_017935]                              | 3.758  | up | 559 |
| A_23_P392476   | AK9                | Homo sapiens adenylate kinase 9 (AK9), transcript variant 1, mRNA [NM_001145128]                                                         | 3.717  | up | 560 |
| A_23_P313632   | FUT8               | Homo sapiens fucosyltransferase 8 (alpha (1,6) fucosyltransferase) (FUT8), transcript variant 1, mRNA [NM_178155]                        | 4.143  | up | 561 |
| A_23_P328621   | UBQLNL             | Homo sapiens ubiquilin-like (UBQLNL), mRNA [NM_145053]                                                                                   | 3.901  | up | 562 |
| A_23_P24623    | ELP4               | Homo sapiens elongator acetyltransferase complex subunit 4 (ELP4), transcript variant 1, mRNA [NM_019040]                                | 3.717  | up | 563 |
| A_23_P93464    | BCKDHB             | Homo sapiens branched chain keto acid dehydrogenase E1, beta polypeptide (BCKDHB), transcript variant 2, mRNA [NM_000056]                | 4.260  | up | 564 |
| A_33_P3352873  | BCKDHB             | Homo sapiens branched chain keto acid dehydrogenase E1, beta polypeptide (BCKDHB), transcript variant 2, mRNA [NM_000056]                | 4.522  | up | 565 |
| A_23_P33720    | FARS2              | Homo sapiens phenylalanyl-tRNA synthetase 2, mitochondrial (FARS2), mRNA [NM_006567]                                                     | 3.493  | up | 566 |
| A_24_P72518    | AHCYL2             | Homo sapiens adenosylhomocysteinase-like 2 (AHCYL2), transcript variant 1, mRNA [NM_015328]                                              | 3.813  | up | 567 |
| A_24_P194886   | EHBP1              | Homo sapiens EH domain binding protein 1 (EHBP1), transcript variant 1, mRNA [NM_015252]                                                 | 3.625  | up | 568 |
| A_24_P71244    | PIK3CD             | Homo sapiens phosphatidylinositol-4,5-bisphosphate 3-kinase, catalytic subunit delta (PIK3CD), mRNA [NM_005026]                          | 3.176  | up | 569 |
| A_33_P3384543  | POMGNT1            | Homo sapiens protein O-linked mannose N-acetylglucosaminyltransferase 1 (beta 1,2-) (POMGNT1), transcript variant 2, mRNA [NM_001243766] | 3.158  | up | 570 |
| A_23_P136196   | TBC1D19            | Homo sapiens TBC1 domain family, member 19 (TBC1D19), transcript variant 1, mRNA [NM_018317]                                             | 3.943  | up | 571 |
| A_32_P71113    | SCAI               | Homo sapiens suppressor of cancer cell invasion (SCAI), transcript variant 1, mRNA [NM_173690]                                           | 3.795  | up | 572 |

|                |                  |                                                                                                                            |        |    |     |
|----------------|------------------|----------------------------------------------------------------------------------------------------------------------------|--------|----|-----|
| A_23_P133359   | ZFP2             | Homo sapiens ZFP2 zinc finger protein (ZFP2), mRNA [NM_030613]                                                             | 5.540  | up | 573 |
| A_23_P126757   | INTS3            | Homo sapiens integrator complex subunit 3 (INTS3), mRNA [NM_023015]                                                        | 3.681  | up | 574 |
| A_23_P140427   | EVL              | Homo sapiens Enah/Vasp-like (EVL), mRNA [NM_016337]                                                                        | 4.564  | up | 575 |
| A_23_P54556    | MKL2             | Homo sapiens MKL/myocardin-like 2 (MKL2), mRNA [NM_014048]                                                                 | 4.805  | up | 576 |
| A_23_P33154    | STAU2            | Homo sapiens staufen double-stranded RNA binding protein 2 (STAU2), transcript variant 5, mRNA [NM_014393]                 | 4.333  | up | 577 |
| A_23_P97810    | na               | poly (ADP-ribose) glycohydrolase [Source:HGNC Symbol;Acc:HGNC:8605] [ENST00000614063]                                      | 3.191  | up | 578 |
| A_23_P138125   | FAIM3            | Homo sapiens Fas apoptotic inhibitory molecule 3 (FAIM3), transcript variant 1, mRNA [NM_005449]                           | 4.519  | up | 579 |
| A_33_P3351101  | TYSND1           | Homo sapiens trypsin domain containing 1 (TYSND1), transcript variant 1, mRNA [NM_173555]                                  | 4.252  | up | 580 |
| A_33_P3327333  | IRF3             | Homo sapiens interferon regulatory factor 3 (IRF3), transcript variant 3, mRNA [NM_001197123]                              | 3.120  | up | 581 |
| A_24_P333421   | ZNF862           | Homo sapiens zinc finger protein 862 (ZNF862), mRNA [NM_001099220]                                                         | 3.884  | up | 582 |
| A_33_P3210965  | TCTN1            | Homo sapiens tectonic family member 1 (TCTN1), transcript variant 1, mRNA [NM_001082538]                                   | 3.331  | up | 583 |
| A_21_P0010860  | LINC00202-1      | Homo sapiens long intergenic non-protein coding RNA 202-1 (LINC00202-1), long non-coding RNA [NR_026795]                   | 3.457  | up | 584 |
| A_21_P0000702  | STX18-AS1        | Homo sapiens STX18 antisense RNA 1 (head to head) (STX18-AS1), long non-coding RNA [NR_037888]                             | 3.940  | up | 585 |
| A_23_P389692   | KIAA1328         | Homo sapiens KIAA1328 (KIAA1328), mRNA [NM_020776]                                                                         | 4.489  | up | 586 |
| A_33_P3256425  | BICD1            | Homo sapiens bicaudal D homolog 1 (Drosophila) (BICD1), transcript variant 1, mRNA [NM_001714]                             | 4.919  | up | 587 |
| A_33_P3343957  | EHBP1            | Homo sapiens EH domain binding protein 1 (EHBP1), transcript variant 1, mRNA [NM_015252]                                   | 3.103  | up | 588 |
| A_33_P3305531  | METTL15          | Homo sapiens methyltransferase like 15 (METTL15), transcript variant 3, mRNA [NM_001297775]                                | 3.764  | up | 589 |
| A_23_P346982   | DTWD2            | Homo sapiens DTW domain containing 2 (DTWD2), mRNA [NM_173666]                                                             | 3.971  | up | 590 |
| A_23_P14458    | L3HYPDH          | Homo sapiens L-3-hydroxyproline dehydratase (trans-) (L3HYPDH), mRNA [NM_144581]                                           | 4.646  | up | 591 |
| A_23_P436526   | SLC25A42         | Homo sapiens solute carrier family 25, member 42 (SLC25A42), mRNA [NM_178526]                                              | 3.274  | up | 592 |
| A_19_P00319698 | na               | KIAA1328 [Source:HGNC Symbol;Acc:HGNC:29248] [ENST00000601437]                                                             | 3.499  | up | 593 |
| A_32_P86245    | EFHC1            | Homo sapiens EF-hand domain (C-terminal) containing 1 (EFHC1), transcript variant A, mRNA [NM_018100]                      | 4.187  | up | 594 |
| A_32_P167471   | CLMN             | Homo sapiens calmin (calponin-like, transmembrane) (CLMN), mRNA [NM_024734]                                                | 3.754  | up | 595 |
| A_21_P0004811  | lnc-AL035696.1-2 | LNCipedia lincRNA (lnc-AL035696.1-2), lincRNA [lnc-AL035696.1-2:1]                                                         | 10.310 | up | 596 |
| A_23_P20363    | ZC2HC1A          | Homo sapiens zinc finger, C2HC-type containing 1A (ZC2HC1A), mRNA [NM_016010]                                              | 3.265  | up | 597 |
| A_21_P0014689  | LOC100506974     | PREDICTED: Homo sapiens uncharacterized LOC100506974 (LOC100506974), ncRNA [XR_111668]                                     | 3.121  | up | 598 |
| A_23_P343900   | na               | immunoglobulin heavy variable 5-78 (pseudogene) [Source:HGNC Symbol;Acc:HGNC:5660] [ENST00000450948]                       | 5.753  | up | 599 |
| A_33_P3240182  | na               | immunoglobulin heavy variable 5-51 [Source:HGNC Symbol;Acc:HGNC:5659] [ENST00000390626]                                    | 4.587  | up | 600 |
| A_33_P3278137  | RPL31P11         | Homo sapiens ribosomal protein L31 pseudogene 11 (RPL31P11), non-coding RNA [NR_002595]                                    | 3.699  | up | 601 |
| A_23_P205348   | TCL6             | Homo sapiens T-cell leukemia/lymphoma 6 (non-protein coding) (TCL6), long non-coding RNA [NR_028288]                       | 4.057  | up | 602 |
| A_23_P363203   | TCL6             | Homo sapiens T-cell leukemia/lymphoma 6 (non-protein coding) (TCL6), long non-coding RNA [NR_028288]                       | 4.499  | up | 603 |
| A_33_P3401342  | lnc-TCL1B-1      | Homo sapiens T-cell leukemia/lymphoma 6, mRNA (cDNA clone MGC:52120 IMAGE:5923478), complete cds. [BC041075]               | 5.397  | up | 604 |
| A_33_P3222728  | ZKSCAN7          | Homo sapiens zinc finger with KRAB and SCAN domains 7 (ZKSCAN7), transcript variant 5, mRNA [NM_001288592]                 | 4.814  | up | 605 |
| A_21_P0012741  | lnc-LARP1B-2     | Homo sapiens cDNA FLJ41533 fis, clone BRTHA2016179. [AK123527]                                                             | 3.472  | up | 606 |
| A_33_P3362696  | RIC8B            | Homo sapiens RIC8 guanine nucleotide exchange factor B (RIC8B), mRNA [NM_018157]                                           | 3.208  | up | 607 |
| A_33_P3449397  | METTL3           | Homo sapiens methyltransferase like 3 (METTL3), mRNA [NM_019852]                                                           | 3.334  | up | 608 |
| A_33_P3218980  | ENTPD1           | Homo sapiens ectonucleoside triphosphate diphosphohydrolase 1 (ENTPD1), transcript variant 1, mRNA [NM_001776]             | 3.369  | up | 609 |
| A_23_P4714     | MIA              | Homo sapiens melanoma inhibitory activity (MIA), transcript variant 1, mRNA [NM_006533]                                    | 5.170  | up | 610 |
| A_23_P423482   | FAM81A           | Homo sapiens family with sequence similarity 81, member A (FAM81A), mRNA [NM_152450]                                       | 5.927  | up | 611 |
| A_33_P3299254  | VPREB3           | Homo sapiens pre-B lymphocyte 3 (VPREB3), mRNA [NM_013378]                                                                 | 5.645  | up | 612 |
| A_33_P3401990  | VPREB3           | Homo sapiens pre-B lymphocyte 3 (VPREB3), mRNA [NM_013378]                                                                 | 5.531  | up | 613 |
| A_33_P3236734  | CLEC17A          | Homo sapiens C-type lectin domain family 17, member A (CLEC17A), transcript variant 1, mRNA [NM_001204118]                 | 3.507  | up | 614 |
| A_32_P79434    | PTPRN2           | Homo sapiens protein tyrosine phosphatase, receptor type, N polypeptide 2 (PTPRN2), transcript variant 1, mRNA [NM_002847] | 4.862  | up | 615 |
| A_23_P103803   | FCRL3            | Homo sapiens Fc receptor-like 3 (FCRL3), mRNA [NM_052939]                                                                  | 5.504  | up | 616 |
| A_33_P3368334  | FCRL3            | Fc receptor-like 3 [Source:HGNC Symbol;Acc:HGNC:18506] [ENST00000480682]                                                   | 7.939  | up | 617 |
| A_23_P360804   | CPNE5            | Homo sapiens copine V (CPNE5), mRNA [NM_020939]                                                                            | 6.361  | up | 618 |
| A_24_P319647   | FCRL2            | Homo sapiens Fc receptor-like 2 (FCRL2), transcript variant 1, mRNA [NM_030764]                                            | 5.609  | up | 619 |
| A_23_P160751   | FCRL2            | Homo sapiens Fc receptor-like 2 (FCRL2), transcript variant 1, mRNA [NM_030764]                                            | 5.745  | up | 620 |
| A_33_P3294504  | FCRL1            | Homo sapiens Fc receptor-like 1 (FCRL1), transcript variant 2, mRNA [NM_001159397]                                         | 3.942  | up | 621 |
| A_23_P149368   | FCRL1            | Homo sapiens Fc receptor-like 1 (FCRL1), transcript variant 1, mRNA [NM_052938]                                            | 5.905  | up | 622 |
| A_23_P208182   | SIGLEC10         | Homo sapiens sialic acid binding Ig-like lectin 10 (SIGLEC10), transcript variant 1, mRNA [NM_033130]                      | 3.303  | up | 623 |
| A_23_P156562   | CRIP3            | Homo sapiens cysteine-rich protein 3 (CRIP3), mRNA [NM_206922]                                                             | 4.784  | up | 624 |
| A_21_P0012439  | TRANK1           | Homo sapiens tetratricopeptide repeat and ankyrin repeat containing 1 (TRANK1), mRNA [NM_014831]                           | 3.205  | up | 625 |
| A_33_P3306823  | ZNF846           | Homo sapiens zinc finger protein 846 (ZNF846), mRNA [NM_001077624]                                                         | 3.774  | up | 626 |
| A_33_P3337981  | FIG4             | Homo sapiens FIG4 phosphoinositide 5-phosphatase (FIG4), mRNA [NM_014845]                                                  | 3.764  | up | 627 |
| A_21_P0002653  | ASXL2            | additional sex combs like transcriptional regulator 2 [Source:HGNC Symbol;Acc:HGNC:23805] [ENST00000435504]                | 3.398  | up | 628 |
| A_23_P311640   | AGFG2            | Homo sapiens ArfGAP with FG repeats 2 (AGFG2), mRNA [NM_006076]                                                            | 3.636  | up | 629 |
| A_21_P0012221  | ANKRD20A11P      | Homo sapiens ankyrin repeat domain 20 family, member A11, pseudogene (ANKRD20A11P), non-coding RNA [NR_027270]             | 3.204  | up | 630 |
| A_23_P209799   | MYO7B            | Homo sapiens myosin VIIb (MYO7B), mRNA [NM_001080527]                                                                      | 4.700  | up | 631 |
| A_32_P161033   | lnc-RP3-377D14.1 | Homo sapiens, clone IMAGE:6155889, mRNA. [BC043411]                                                                        | 4.307  | up | 632 |
| A_23_P21673    | FOCAD            | Homo sapiens foadhesin (FOCAD), mRNA [NM_017794]                                                                           | 3.909  | up | 633 |
| A_21_P0014186  | LOC101927811     | Homo sapiens uncharacterized LOC101927811 (LOC101927811), transcript variant 1, long non-coding RNA [NR_110119]            | 4.547  | up | 634 |
| A_23_P152047   | SCAMP5           | Homo sapiens secretory carrier membrane protein 5 (SCAMP5), transcript variant 3, mRNA [NM_138967]                         | 3.946  | up | 635 |
| A_33_P3211968  | lnc-TCL1B-2      | human full-length cDNA clone CS0GD006Y19 of B cells (Ramos cell line) of Homo sapiens (human). [BX247990]                  | 6.978  | up | 636 |
| A_21_P0000769  | LOC100505622     | Homo sapiens uncharacterized LOC100505622 (LOC100505622), long non-coding RNA [NR_038332]                                  | 3.159  | up | 637 |

|                |              |                                                                                                                                            |       |    |     |
|----------------|--------------|--------------------------------------------------------------------------------------------------------------------------------------------|-------|----|-----|
| A_33_P3421728  | DGKG         | Homo sapiens diacylglycerol kinase, gamma 90kDa (DGKG), transcript variant 1, mRNA [NM_001346]                                             | 3.819 | up | 638 |
| A_33_P3366175  | LOC100130298 | Homo sapiens hCG1816373-like (LOC100130298), long non-coding RNA [NR_034003]                                                               | 4.806 | up | 639 |
| A_32_P167904   | ZNF681       | Homo sapiens zinc finger protein 681 (ZNF681), mRNA [NM_138286]                                                                            | 4.404 | up | 640 |
| A_33_P3226212  | JAM2         | Homo sapiens junctional adhesion molecule 2 (JAM2), transcript variant 3, mRNA [NM_001270408]                                              | 7.402 | up | 641 |
| A_21_P0014373  | lnc-ZNF667-2 | Homo sapiens mRNA; cDNA DKFZp686A1999 (from clone DKFZp686A1999). [BX647249]                                                               | 3.541 | up | 642 |
| A_33_P3336587  | LOC283710    | Homo sapiens uncharacterized LOC283710 (LOC283710), mRNA [NM_001243538]                                                                    | 5.461 | up | 643 |
| A_33_P3482534  | LOC613266    | Homo sapiens hypothetical LOC613266, mRNA (cDNA clone IMAGE:5222345). [BC043571]                                                           | 4.954 | up | 644 |
| A_23_P121396   | DNAJC19      | Homo sapiens DnaJ (Hsp40) homolog, subfamily C, member 19 (DNAJC19), transcript variant 1, mRNA [NM_145261]                                | 3.897 | up | 645 |
| A_33_P3231367  | ATXN10       | Homo sapiens ataxin 10 (ATXN10), transcript variant 1, mRNA [NM_013236]                                                                    | 4.113 | up | 646 |
| A_24_P142269   | HIRIP3       | Homo sapiens HIRA interacting protein 3 (HIRIP3), transcript variant 1, mRNA [NM_003609]                                                   | 4.269 | up | 647 |
| A_23_P91487    | RWDD2B       | Homo sapiens RWD domain containing 2B (RWDD2B), mRNA [NM_016940]                                                                           | 4.816 | up | 648 |
| A_23_P151368   | N6AMT2       | Homo sapiens N-6 adenine-specific DNA methyltransferase 2 (putative) (N6AMT2), mRNA [NM_174928]                                            | 6.011 | up | 649 |
| A_23_P97736    | NCDN         | Homo sapiens neurochondrin (NCDN), transcript variant 3, mRNA [NM_014284]                                                                  | 6.451 | up | 650 |
| A_33_P3368301  | BOLA3        | Homo sapiens bola family member 3 (BOLA3), transcript variant 1, mRNA [NM_121552]                                                          | 3.941 | up | 651 |
| A_23_P42802    | PDIA4        | Homo sapiens protein disulfide isomerase family A, member 4 (PDIA4), mRNA [NM_004911]                                                      | 3.683 | up | 652 |
| A_23_P102517   | PDE6D        | Homo sapiens phosphodiesterase 6D, cGMP-specific, rod, delta (PDE6D), transcript variant 1, mRNA [NM_002601]                               | 4.271 | up | 653 |
| A_23_P211850   | ABHD6        | Homo sapiens abhydrolase domain containing 6 (ABHD6), mRNA [NM_020676]                                                                     | 4.557 | up | 654 |
| A_23_P149813   | RSU1         | Homo sapiens Ras suppressor protein 1 (RSU1), transcript variant 1, mRNA [NM_012425]                                                       | 3.256 | up | 655 |
| A_23_P318604   | CYHR1        | cysteine/histidine-rich 1 [Source:HGNC Symbol;Acc:HGNC:17806] [ENST00000528663]                                                            | 3.824 | up | 656 |
| A_23_P97221    | ZNF691       | Homo sapiens zinc finger protein 691 (ZNF691), transcript variant 2, mRNA [NM_015911]                                                      | 3.276 | up | 657 |
| A_23_P120931   | APOBEC3C     | Homo sapiens apolipoprotein B mRNA editing enzyme, catalytic polypeptide-like 3C (APOBEC3C), mRNA [NM_014508]                              | 4.117 | up | 658 |
| A_23_P357101   | APOBEC3F     | Homo sapiens apolipoprotein B mRNA editing enzyme, catalytic polypeptide-like 3F (APOBEC3F), transcript variant 1, mRNA [NM_145298]        | 3.868 | up | 659 |
| A_23_P37144    | DTD2         | Homo sapiens D-tyrosyl-tRNA deacylase 2 (putative) (DTD2), mRNA [NM_080664]                                                                | 3.327 | up | 660 |
| A_23_P95823    | NSMCE1       | Homo sapiens non-SMC element 1 homolog (S. cerevisiae) (NSMCE1), mRNA [NM_145080]                                                          | 3.826 | up | 661 |
| A_33_P3215059  | NSMCE1       | Homo sapiens non-SMC element 1 homolog (S. cerevisiae) (NSMCE1), mRNA [NM_145080]                                                          | 3.386 | up | 662 |
| A_23_P216630   | SLC44A1      | Homo sapiens solute carrier family 44 (choline transporter), member 1 (SLC44A1), transcript variant 1, mRNA [NM_080546]                    | 3.158 | up | 663 |
| A_23_P65830    | HDDC3        | Homo sapiens HD domain containing 3 (HDCC3), transcript variant 2, mRNA [NM_198527]                                                        | 3.204 | up | 664 |
| A_23_P15305    | PRPSAP1      | Homo sapiens phosphoribosyl pyrophosphate synthetase-associated protein 1 (PRPSAP1), mRNA [NM_002766]                                      | 4.139 | up | 665 |
| A_24_P57730    | MRPL52       | Homo sapiens mitochondrial ribosomal protein L52 (MRPL52), transcript variant 4, mRNA [NM_181304]                                          | 6.435 | up | 666 |
| A_23_P97932    | MSRB2        | Homo sapiens methionine sulfoxide reductase B2 (MSRB2), mRNA [NM_012228]                                                                   | 3.522 | up | 667 |
| A_24_P818529   | na           | ribonuclease H2, subunit C pseudogene 1 [Source:HGNC Symbol;Acc:HGNC:24117] [ENST00000454281]                                              | 3.192 | up | 668 |
| A_23_P166248   | RCAN1        | Homo sapiens regulator of calcineurin 1 (RCAN1), transcript variant 1, mRNA [NM_004414]                                                    | 3.599 | up | 669 |
| A_24_P192805   | CARD17       | Homo sapiens caspase recruitment domain family, member 17 (CARD17), mRNA [NM_001007232]                                                    | 3.362 | up | 670 |
| A_23_P92261    | ECE2         | Homo sapiens endothelin converting enzyme 2 (ECE2), transcript variant 3, mRNA [NM_032331]                                                 | 3.172 | up | 671 |
| A_24_P184388   | LRTOMT       | Homo sapiens leucine rich transmembrane and O-methyltransferase domain containing (LRTOMT), transcript variant 1, mRNA [NM_145309]         | 4.114 | up | 672 |
| A_33_P3286046  | DPCD         | Homo sapiens deleted in primary ciliary dyskinesia homolog (mouse) (DPCD), mRNA [NM_015448]                                                | 3.133 | up | 673 |
| A_23_P252201   | EAF2         | Homo sapiens ELL associated factor 2 (EAF2), mRNA [NM_018456]                                                                              | 3.601 | up | 674 |
| A_23_P3602     | NUDT7        | Homo sapiens nudix (nucleoside diphosphate linked moiety X)-type motif 7 (NUDT7), transcript variant 3, mRNA [NM_001243657]                | 3.965 | up | 675 |
| A_21_P0013589  | LINC01504    | Homo sapiens long intergenic non-protein coding RNA 1504 (LINC01504), transcript variant 2, long non-coding RNA [NR_110953]                | 3.537 | up | 676 |
| A_23_P125668   | SLC25A43     | Homo sapiens solute carrier family 25, member 43 (SLC25A43), mRNA [NM_145305]                                                              | 3.260 | up | 677 |
| A_33_P3386765  | ABHD14A      | Homo sapiens abhydrolase domain containing 14A (ABHD14A), mRNA [NM_015407]                                                                 | 3.882 | up | 678 |
| A_33_P3283713  | ABHD14A      | Homo sapiens abhydrolase domain containing 14A (ABHD14A), mRNA [NM_015407]                                                                 | 3.498 | up | 679 |
| A_33_P3353816  | ITGA4        | Homo sapiens integrin, alpha 4 (antigen CD49D, alpha 4 subunit of VLA-4 receptor) (ITGA4), mRNA [NM_000885]                                | 3.164 | up | 680 |
| A_23_P56505    | ITGA4        | Homo sapiens integrin, alpha 4 (antigen CD49D, alpha 4 subunit of VLA-4 receptor) (ITGA4), mRNA [NM_000885]                                | 3.382 | up | 681 |
| A_24_P306443   | LOC100233156 | Homo sapiens tektin 4 pseudogene (LOC100233156), transcript variant 1, non-coding RNA [NR_037871]                                          | 3.162 | up | 682 |
| A_19_P00315584 | LOC100130691 | Homo sapiens uncharacterized LOC100130691 (LOC100130691), long non-coding RNA [NR_026966]                                                  | 4.676 | up | 683 |
| A_24_P400172   | LOC100130691 | Homo sapiens uncharacterized LOC100130691 (LOC100130691), long non-coding RNA [NR_026966]                                                  | 4.813 | up | 684 |
| A_19_P00315583 | LOC100130691 | Homo sapiens uncharacterized LOC100130691 (LOC100130691), long non-coding RNA [NR_026966]                                                  | 4.019 | up | 685 |
| A_23_P140876   | ABCA3        | Homo sapiens ATP-binding cassette, sub-family A (ABC1), member 3 (ABCA3), mRNA [NM_001089]                                                 | 4.707 | up | 686 |
| A_23_P251680   | COMT         | Homo sapiens catechol-O-methyltransferase (COMT), transcript variant 1, mRNA [NM_000754]                                                   | 3.208 | up | 687 |
| A_33_P3398897  | QDPR         | Homo sapiens quinoid dihydropteridine reductase (QDPR), mRNA [NM_000320]                                                                   | 3.707 | up | 688 |
| A_33_P3379091  | SYNGR1       | Homo sapiens synaptogyrin 1 (SYNGR1), transcript variant 1b, mRNA [NM_145731]                                                              | 3.315 | up | 689 |
| A_32_P114284   | IKZF2        | Homo sapiens IKAROS family zinc finger 2 (Helios) (IKZF2), transcript variant 2, mRNA [NM_001079526]                                       | 4.210 | up | 690 |
| A_21_P0000089  | ZFYVE28      | Homo sapiens zinc finger, FYVE domain containing 28 (ZFYVE28), transcript variant 6, mRNA [NM_001172660]                                   | 3.145 | up | 691 |
| A_23_P126836   | TNFSF4       | Homo sapiens tumor necrosis factor (ligand) superfamily, member 4 (TNFSF4), transcript variant 1, mRNA [NM_003326]                         | 3.889 | up | 692 |
| A_23_P162486   | PTPN6        | Homo sapiens protein tyrosine phosphatase, non-receptor type 6 (PTPN6), transcript variant 1, mRNA [NM_002831]                             | 3.461 | up | 693 |
| A_24_P228717   | RAC2         | Homo sapiens ras-related C3 botulinum toxin substrate 2 (rho family, small GTP binding protein Rac2) (RAC2), mRNA [NM_002872]              | 3.902 | up | 694 |
| A_23_P218770   | RAC2         | Homo sapiens ras-related C3 botulinum toxin substrate 2 (rho family, small GTP binding protein Rac2) (RAC2), mRNA [NM_002872]              | 4.093 | up | 695 |
| A_23_P78108    | ALDOC        | Homo sapiens aldolase C, fructose-bisphosphate (ALDOC), mRNA [NM_005165]                                                                   | 3.162 | up | 696 |
| A_24_P852756   | HLA-DQA2     | Homo sapiens major histocompatibility complex, class II, DQ alpha 2 (HLA-DQA2), mRNA [NM_020056]                                           | 3.768 | up | 697 |
| A_21_P0002674  | FLJ42351     | Homo sapiens uncharacterized LOC400999 (FLJ42351), long non-coding RNA [NR_033871]                                                         | 3.236 | up | 698 |
| A_23_P887      | IKBKE        | Homo sapiens inhibitor of kappa light polypeptide gene enhancer in B-cells, kinase epsilon (IKBKE), transcript variant 1, mRNA [NM_014002] | 3.164 | up | 699 |
| A_23_P42144    | PEX6         | Homo sapiens peroxisomal biogenesis factor 6 (PEX6), mRNA [NM_000287]                                                                      | 4.714 | up | 700 |

|               |                |                                                                                                                              |       |    |     |
|---------------|----------------|------------------------------------------------------------------------------------------------------------------------------|-------|----|-----|
| A_21_P000047  | DISC1          | Homo sapiens disrupted in schizophrenia 1 (DISC1), transcript variant g, mRNA [NM_001164544]                                 | 4.182 | up | 701 |
| A_23_P40821   | HPS3           | Homo sapiens Hermansky-Pudlak syndrome 3 (HPS3), mRNA [NM_032383]                                                            | 3.106 | up | 702 |
| A_23_P83028   | RECK           | Homo sapiens reversion-inducing-cysteine-rich protein with kazal motifs (RECK), mRNA [NM_021111]                             | 3.700 | up | 703 |
| A_33_P3741059 | na             | Homo sapiens mRNA; cDNA DKFpZ667K053 (from clone DKFpZ667K053). [AL832882]                                                   | 4.667 | up | 704 |
| A_21_P0007122 | ZBED5-AS1      | Homo sapiens ZBED5 antisense RNA 1 (ZBED5-AS1), long non-coding RNA [NR_034137]                                              | 6.525 | up | 705 |
| A_33_P3415216 | MPV17          | Homo sapiens Mpv17 mitochondrial inner membrane protein (MPV17), mRNA [NM_002437]                                            | 3.625 | up | 706 |
| A_21_P0014888 | na             | BC009371 adipocyte-specific adhesion molecule (Homo sapiens) (exp=-1; wgp=0; cg=0), partial (13%) [THC2642479]               | 3.289 | up | 707 |
| A_24_P182539  | ATG4C          | Homo sapiens autophagy related 4C, cysteine peptidase (ATG4C), transcript variant 1, mRNA [NM_032852]                        | 3.153 | up | 708 |
| A_21_P0002185 | lnc-EFR3B-3    | LNCipedia lincRNA (lnc-EFR3B-3), lincRNA [lnc-EFR3B-3:7]                                                                     | 3.121 | up | 709 |
| A_23_P406350  | MFSD3          | Homo sapiens major facilitator superfamily domain containing 3 (MFSD3), transcript variant 1, mRNA [NM_138431]               | 4.501 | up | 710 |
| A_33_P3245908 | C10orf128      | Homo sapiens chromosome 10 open reading frame 128 (C10orf128), transcript variant 5, mRNA [NM_001288743]                     | 3.766 | up | 711 |
| A_23_P216655  | TRIM14         | Homo sapiens tripartite motif containing 14 (TRIM14), transcript variant 1, mRNA [NM_014788]                                 | 3.197 | up | 712 |
| A_24_P55250   | HDCC2          | Homo sapiens HD domain containing 2 (HDCC2), mRNA [NM_016063]                                                                | 3.197 | up | 713 |
| A_23_P137848  | MRPL24         | Homo sapiens mitochondrial ribosomal protein L24 (MRPL24), transcript variant 1, mRNA [NM_145729]                            | 4.168 | up | 714 |
| A_23_P6535    | KLHDC7B        | Homo sapiens kelch domain containing 7B (KLHDC7B), mRNA [NM_138433]                                                          | 3.343 | up | 715 |
| A_23_P131653  | PIGF           | Homo sapiens phosphatidylinositol glycan anchor biosynthesis, class F (PIGF), transcript variant 1, mRNA [NM_002643]         | 3.805 | up | 716 |
| A_24_P49383   | AAMDC          | Homo sapiens adipogenesis associated, Mth938 domain containing (AAMDC), mRNA [NM_024684]                                     | 4.607 | up | 717 |
| A_24_P341019  | TMEM230        | Homo sapiens transmembrane protein 230 (TMEM230), transcript variant 2, mRNA [NM_001009924]                                  | 3.981 | up | 718 |
| A_23_P17490   | TMEM230        | Homo sapiens transmembrane protein 230 (TMEM230), transcript variant 2, mRNA [NM_001009924]                                  | 3.575 | up | 719 |
| A_23_P359904  | PDCC1          | Homo sapiens Parkinson disease 7 domain containing 1 (PDCC1), mRNA [NM_182612]                                               | 4.370 | up | 720 |
| A_24_P245246  | PIP4K2B        | Homo sapiens phosphatidylinositol-5-phosphate 4-kinase, type II, beta (PIP4K2B), mRNA [NM_003559]                            | 3.808 | up | 721 |
| A_23_P146209  | RNF170         | Homo sapiens ring finger protein 170 (RNF170), transcript variant 2, mRNA [NM_030954]                                        | 4.263 | up | 722 |
| A_32_P129968  | ZNF284         | zinc finger protein 284 [Source:HGNC Symbol;Acc:HGNC:13078] [ENST00000421176]                                                | 4.609 | up | 723 |
| A_33_P3361417 | C6orf57        | Homo sapiens chromosome 6 open reading frame 57 (C6orf57), mRNA [NM_145267]                                                  | 3.328 | up | 724 |
| A_33_P3271755 | SIRT5          | Homo sapiens sirtuin 5 (SIRT5), transcript variant 2, mRNA [NM_031244]                                                       | 3.199 | up | 725 |
| A_24_P40594   | HOMEZ          | Homo sapiens homeobox and leucine zipper encoding (HOMEZ), mRNA [NM_020834]                                                  | 3.636 | up | 726 |
| A_23_P88753   | TSR3           | Homo sapiens TSR3, 20S rRNA accumulation, homolog (S. cerevisiae) (TSR3), mRNA [NM_001001410]                                | 3.182 | up | 727 |
| A_33_P3246007 | APOA1BP        | Homo sapiens apolipoprotein A-I binding protein (APOA1BP), mRNA [NM_144772]                                                  | 3.583 | up | 728 |
| A_23_P61960   | ATP6V0E2       | Homo sapiens ATPase, H+ transporting V0 subunit e2 (ATP6V0E2), transcript variant 1, mRNA [NM_145230]                        | 3.176 | up | 729 |
| A_24_P75072   | SMUG1          | Homo sapiens single-strand-selective monofunctional uracil-DNA glycosylase 1 (SMUG1), transcript variant 1, mRNA [NM_014311] | 3.739 | up | 730 |
| A_23_P34307   | PIGK           | Homo sapiens phosphatidylinositol glycan anchor biosynthesis, class K (PIGK), mRNA [NM_005482]                               | 4.905 | up | 731 |
| A_23_P201035  | GBA            | Homo sapiens glucosidase, beta, acid (GBA), transcript variant 2, mRNA [NM_001005741]                                        | 3.233 | up | 732 |
| A_23_P123454  | NUDT18         | Homo sapiens nudix (nucleoside diphosphate linked moiety X)-type motif 18 (NUDT18), mRNA [NM_024815]                         | 3.472 | up | 733 |
| A_24_P370670  | ZMYM6NB        | Homo sapiens ZMYM6 neighbor (ZMYM6NB), mRNA [NM_001195156]                                                                   | 3.161 | up | 734 |
| A_23_P431569  | LOC100049716   | Homo sapiens uncharacterized LOC100049716 (LOC100049716), long non-coding RNA [NR_122124]                                    | 3.237 | up | 735 |
| A_33_P3261610 | POLR3GL        | Homo sapiens polymerase (RNA) III (DNA directed) polypeptide G (32kD)-like (POLR3GL), mRNA [NM_032305]                       | 3.115 | up | 736 |
| A_23_P23855   | POLR3GL        | Homo sapiens polymerase (RNA) III (DNA directed) polypeptide G (32kD)-like (POLR3GL), mRNA [NM_032305]                       | 3.363 | up | 737 |
| A_23_P56759   | KRCC1          | Homo sapiens lysine-rich coiled-coil 1 (KRCC1), mRNA [NM_016618]                                                             | 5.416 | up | 738 |
| A_23_P350574  | FCRLB          | Homo sapiens Fc receptor-like B (FCRLB), transcript variant 1, mRNA [NM_001002901]                                           | 3.831 | up | 739 |
| A_33_P3244117 | STARD9         | StAR-related lipid transfer (START) domain containing 9 [Source:HGNC Symbol;Acc:HGNC:19162] [ENST00000568493]                | 5.388 | up | 740 |
| A_21_P0011317 | XLOC_I2_004640 | BROAD Institute lincRNA (XLOC_I2_004640), lincRNA [TCONS_I2_00008603]                                                        | 4.070 | up | 741 |
| A_33_P3329898 | STARD9         | StAR-related lipid transfer (START) domain containing 9 [Source:HGNC Symbol;Acc:HGNC:19162] [ENST00000564158]                | 6.349 | up | 742 |
| A_23_P38677   | SLMO1          | Homo sapiens slowmo homolog 1 (Drosophila) (SLMO1), transcript variant 2, mRNA [NM_006553]                                   | 4.329 | up | 743 |
| A_21_P0011320 | XLOC_I2_004640 | BROAD Institute lincRNA (XLOC_I2_004640), lincRNA [TCONS_I2_00008608]                                                        | 4.518 | up | 744 |
| A_23_P348298  | SAC3D1         | Homo sapiens SAC3 domain containing 1 (SAC3D1), mRNA [NM_013299]                                                             | 3.423 | up | 745 |
| A_23_P421401  | PDGFRB         | Homo sapiens platelet-derived growth factor receptor, beta polypeptide (PDGFRB), mRNA [NM_002609]                            | 3.382 | up | 746 |
| A_24_P225616  | RRM2           | Homo sapiens ribonucleotide reductase M2 (RRM2), transcript variant 2, mRNA [NM_001034]                                      | 3.467 | up | 747 |
| A_23_P408955  | E2F2           | Homo sapiens E2F transcription factor 2 (E2F2), mRNA [NM_004091]                                                             | 3.640 | up | 748 |
| A_23_P379614  | OIP5           | Homo sapiens Opa interacting protein 5 (OIP5), mRNA [NM_007280]                                                              | 6.188 | up | 749 |
| A_23_P115482  | UBE2T          | Homo sapiens ubiquitin-conjugating enzyme E2T (UBE2T), mRNA [NM_014176]                                                      | 3.469 | up | 750 |
| A_33_P3313796 | CCDC34         | Homo sapiens coiled-coil domain containing 34 (CCDC34), transcript variant 1, mRNA [NM_030771]                               | 6.087 | up | 751 |
| A_32_P221256  | MGC70870       | Homo sapiens C-terminal binding protein 2 pseudogene (MGC70870), non-coding RNA [NR_003682]                                  | 3.296 | up | 752 |
| A_33_P3330099 | ARSD           | Homo sapiens arylsulfatase D (ARSD), mRNA [NM_001669]                                                                        | 3.511 | up | 753 |
| A_33_P3357322 | SMC2           | Homo sapiens structural maintenance of chromosomes 2 (SMC2), transcript variant 1, mRNA [NM_001042550]                       | 3.318 | up | 754 |
| A_23_P48585   | SALL2          | Homo sapiens spalt-like transcription factor 2 (SALL2), transcript variant 1, mRNA [NM_005407]                               | 4.469 | up | 755 |
| A_23_P11862   | C1orf112       | Homo sapiens chromosome 1 open reading frame 112 (C1orf112), mRNA [NM_018186]                                                | 3.825 | up | 756 |
| A_33_P3369153 | KIF3C          | Homo sapiens kinesin family member 3C (KIF3C), mRNA [NM_002254]                                                              | 4.126 | up | 757 |
| A_21_P0007523 | DDX11-AS1      | Homo sapiens DDX11 antisense RNA 1 (DDX11-AS1), long non-coding RNA [NR_038927]                                              | 5.120 | up | 758 |
| A_21_P0001702 | lnc-CHD1L-1    | LNCipedia lincRNA (lnc-CHD1L-1), lincRNA [lnc-CHD1L-1:3]                                                                     | 3.602 | up | 759 |
| A_24_P106112  | PKD2           | Homo sapiens polycystic kidney disease 2 (autosomal dominant) (PKD2), mRNA [NM_000297]                                       | 4.008 | up | 760 |
| A_32_P150891  | DIAPH3         | Homo sapiens diaphanous-related formin 3 (DIAPH3), transcript variant 1, mRNA [NM_001042517]                                 | 4.090 | up | 761 |
| A_23_P251421  | CDCA7          | Homo sapiens cell division cycle associated 7 (CDCA7), transcript variant 1, mRNA [NM_031942]                                | 7.153 | up | 762 |
| A_23_P48088   | CD27           | Homo sapiens CD27 molecule (CD27), mRNA [NM_001242]                                                                          | 3.293 | up | 763 |



|                |                |                                                                                                                                        |       |    |     |
|----------------|----------------|----------------------------------------------------------------------------------------------------------------------------------------|-------|----|-----|
| A_33_P3234202  | DNASE1L3       | Homo sapiens deoxyribonuclease I-like 3 (DNASE1L3), transcript variant 1, mRNA [NM_004944]                                             | 6.763 | up | 764 |
| A_23_P120227   | LBH            | Homo sapiens limb bud and heart development (LBH), mRNA [NM_030915]                                                                    | 3.176 | up | 765 |
| A_23_P29594    | RPL39L         | Homo sapiens ribosomal protein L39-like (RPL39L), mRNA [NM_052969]                                                                     | 5.154 | up | 766 |
| A_24_P379820   | ITM2C          | Homo sapiens integral membrane protein 2C (ITM2C), transcript variant 1, mRNA [NM_030926]                                              | 4.789 | up | 767 |
| A_24_P402690   | ITM2C          | Homo sapiens integral membrane protein 2C (ITM2C), transcript variant 1, mRNA [NM_030926]                                              | 5.317 | up | 768 |
| A_23_P63789    | ZWINT          | Homo sapiens ZW10 interacting kinetochore protein (ZWINT), transcript variant 2, mRNA [NM_032997]                                      | 5.233 | up | 769 |
| A_33_P3212994  | ZWINT          | Homo sapiens ZW10 interacting kinetochore protein (ZWINT), transcript variant 2, mRNA [NM_032997]                                      | 4.314 | up | 770 |
| A_23_P26557    | C16orf59       | Homo sapiens chromosome 16 open reading frame 59 (C16orf59), mRNA [NM_025108]                                                          | 4.543 | up | 771 |
| A_33_P3317523  | STMN1          | Homo sapiens stathmin 1 (STMN1), transcript variant 1, mRNA [NM_203401]                                                                | 3.754 | up | 772 |
| A_33_P3423949  | CBX2           | Homo sapiens chromobox homolog 2 (CBX2), transcript variant 1, mRNA [NM_005189]                                                        | 5.229 | up | 773 |
| A_33_P3219256  | BMPR1A         | Homo sapiens bone morphogenetic protein receptor, type IA (BMPR1A), mRNA [NM_004329]                                                   | 6.520 | up | 774 |
| A_19_P00805548 | BMPR1A         | Homo sapiens bone morphogenetic protein receptor, type IA (BMPR1A), mRNA [NM_004329]                                                   | 6.758 | up | 775 |
| A_33_P3219475  | MSANTD3-TMEFF1 | Homo sapiens MSANTD3-TMEFF1 readthrough (MSANTD3-TMEFF1), mRNA [NM_001198812]                                                          | 3.197 | up | 776 |
| A_21_P0014379  | ZNF793-AS1     | Homo sapiens ZNF793 antisense RNA 1 (head to head) (ZNF793-AS1), long non-coding RNA [NR_110723]                                       | 3.108 | up | 777 |
| A_19_P00808794 | XLOC_I2_008221 | BROAD Institute lincRNA (XLOC_I2_008221), lincRNA [TCONS_I2_00014842]                                                                  | 5.311 | up | 778 |
| A_33_P3391476  | CRYZ           | Homo sapiens crystallin, zeta (quinone reductase) (CRYZ), transcript variant 1, mRNA [NM_001130042]                                    | 3.921 | up | 779 |
| A_23_P39067    | SPIB           | Homo sapiens Spi-B transcription factor (Spi-1/PU.1 related) (SPIB), transcript variant 1, mRNA [NM_003121]                            | 3.114 | up | 780 |
| A_23_P104046   | BPNT1          | Homo sapiens 3'(2'), 5'-bisphosphate nucleotidase 1 (BPNT1), transcript variant 1, mRNA [NM_006085]                                    | 3.319 | up | 781 |
| A_21_P0012929  | XLOC_I2_012319 | BROAD Institute lincRNA (XLOC_I2_012319), lincRNA [TCONS_I2_00023251]                                                                  | 3.598 | up | 782 |
| A_23_P120860   | NIPSNAP1       | Homo sapiens nipsnap homolog 1 (C. elegans) (NIPSNAP1), transcript variant 1, mRNA [NM_003634]                                         | 3.825 | up | 783 |
| A_23_P88904    | NTHL1          | Homo sapiens nth endonuclease III-like 1 (E. coli) (NTHL1), mRNA [NM_002528]                                                           | 5.161 | up | 784 |
| A_23_P59528    | ACN9           | Homo sapiens ACN9 homolog (S. cerevisiae) (ACN9), mRNA [NM_020186]                                                                     | 4.086 | up | 785 |
| A_24_P148811   | RUVBL1         | Homo sapiens RuvB-like AAA ATPase 1 (RUVBL1), mRNA [NM_003707]                                                                         | 4.711 | up | 786 |
| A_23_P164814   | C19orf57       | Homo sapiens chromosome 19 open reading frame 57 (C19orf57), mRNA [NM_024323]                                                          | 3.163 | up | 787 |
| A_23_P133770   | CCDC167        | Homo sapiens coiled-coil domain containing 167 (CCDC167), mRNA [NM_138493]                                                             | 5.743 | up | 788 |
| A_33_P3260100  | CCDC167        | Homo sapiens coiled-coil domain containing 167 (CCDC167), mRNA [NM_138493]                                                             | 3.682 | up | 789 |
| A_23_P31116    | ACOT13         | Homo sapiens acyl-CoA thioesterase 13 (ACOT13), transcript variant 1, mRNA [NM_018473]                                                 | 3.399 | up | 790 |
| A_21_P0014321  | ATP2A1-AS1     | Homo sapiens ATP2A1 antisense RNA 1 (ATP2A1-AS1), transcript variant 1, long non-coding RNA [NR_046287]                                | 3.342 | up | 791 |
| A_24_P343095   | DHFR           | Homo sapiens dihydrofolate reductase (DHFR), transcript variant 1, mRNA [NM_000791]                                                    | 3.516 | up | 792 |
| A_23_P32135    | C9orf9         | Homo sapiens chromosome 9 open reading frame 9 (C9orf9), mRNA [NM_018956]                                                              | 4.538 | up | 793 |
| A_33_P3764802  | SIRT5          | Homo sapiens sirtuin 5 (SIRT5), transcript variant 1, mRNA [NM_012241]                                                                 | 3.200 | up | 794 |
| A_33_P3390778  | TRIM46         | Homo sapiens tripartite motif containing 46 (TRIM46), transcript variant 2, mRNA [NM_001256599]                                        | 7.981 | up | 795 |
| A_23_P18413    | TIMMDC1        | Homo sapiens translocase of inner mitochondrial membrane domain containing 1 (TIMMDC1), mRNA [NM_016589]                               | 3.460 | up | 796 |
| A_23_P150009   | ZDHHC16        | Homo sapiens zinc finger, DHHC-type containing 16 (ZDHHC16), transcript variant 5, mRNA [NM_198046]                                    | 4.643 | up | 797 |
| A_33_P3340025  | GINS1          | Homo sapiens GINS complex subunit 1 (Psf1 homolog) (GINS1), mRNA [NM_021067]                                                           | 8.166 | up | 798 |
| A_32_P1701     | POLA1          | Homo sapiens polymerase (DNA directed), alpha 1, catalytic subunit (POLA1), mRNA [NM_016937]                                           | 3.791 | up | 799 |
| A_33_P3296372  | EIF2B3         | Homo sapiens eukaryotic translation initiation factor 2B, subunit 3 gamma, 58kDa (EIF2B3), transcript variant 1, mRNA [NM_020365]      | 5.697 | up | 800 |
| A_24_P73943    | COX11          | Homo sapiens COX11 cytochrome c oxidase copper chaperone (COX11), transcript variant 1, mRNA [NM_004375]                               | 6.883 | up | 801 |
| A_33_P3218584  | POP5           | Homo sapiens processing of precursor 5, ribonuclease P/MRP subunit (S. cerevisiae) (POP5), transcript variant 1, mRNA [NM_015918]      | 4.298 | up | 802 |
| A_23_P153098   | HDHD2          | Homo sapiens haloacid dehalogenase-like hydrolase domain containing 2 (HDHD2), mRNA [NM_032124]                                        | 8.984 | up | 803 |
| A_23_P207517   | PKD2           | Homo sapiens pyruvate dehydrogenase kinase, isozyme 2 (PKD2), transcript variant 1, mRNA [NM_002611]                                   | 4.115 | up | 804 |
| A_23_P90732    | PNKD           | Homo sapiens paroxysmal nonkinesigenic dyskinesia (PNKD), transcript variant 3, mRNA [NM_001077399]                                    | 6.650 | up | 805 |
| A_21_P0000034  | COX11          | Homo sapiens COX11 cytochrome c oxidase copper chaperone (COX11), transcript variant 1, mRNA [NM_004375]                               | 9.076 | up | 806 |
| A_23_P111000   | PSMB9          | Homo sapiens proteasome (prosome, macropain) subunit, beta type, 9 (PSMB9), mRNA [NM_002800]                                           | 4.735 | up | 807 |
| A_21_P0013869  | FIRRE          | Homo sapiens firre intergenic repeating RNA element (FIRRE), long non-coding RNA [NR_026975]                                           | 4.800 | up | 808 |
| A_21_P0013831  | XLOC_I2_015821 | BROAD Institute lincRNA (XLOC_I2_015821), lincRNA [TCONS_I2_00030598]                                                                  | 6.382 | up | 809 |
| A_21_P0013832  | FIRRE          | Homo sapiens firre intergenic repeating RNA element (FIRRE), long non-coding RNA [NR_026975]                                           | 6.660 | up | 810 |
| A_21_P0011391  | CHEK2          | Homo sapiens checkpoint kinase 2 (CHEK2), transcript variant 3, mRNA [NM_001005735]                                                    | 4.916 | up | 811 |
| A_21_P0011475  | CHEK2          | Homo sapiens checkpoint kinase 2 (CHEK2), transcript variant 3, mRNA [NM_001005735]                                                    | 4.347 | up | 812 |
| A_21_P0011474  | CHEK2          | Homo sapiens checkpoint kinase 2 (CHEK2), transcript variant 3, mRNA [NM_001005735]                                                    | 5.076 | up | 813 |
| A_23_P203115   | TMEM25         | Homo sapiens transmembrane protein 25 (TMEM25), transcript variant 1, mRNA [NM_032780]                                                 | 3.792 | up | 814 |
| A_33_P3400152  | ENTPD1-AS1     | Homo sapiens ENTPD1 antisense RNA 1 (ENTPD1-AS1), long non-coding RNA [NR_038444]                                                      | 3.372 | up | 815 |
| A_23_P207400   | BRCA1          | Homo sapiens breast cancer 1, early onset (BRCA1), transcript variant 2, mRNA [NM_007300]                                              | 7.853 | up | 816 |
| A_33_P3301524  | XRCC3          | Homo sapiens X-ray repair complementing defective repair in Chinese hamster cells 3 (XRCC3), transcript variant 1, mRNA [NM_001100119] | 3.731 | up | 817 |
| A_23_P53276    | TIMELESS       | Homo sapiens timeless circadian clock (TIMELESS), mRNA [NM_003920]                                                                     | 3.801 | up | 818 |
| A_23_P207201   | CD79B          | Homo sapiens CD79b molecule, immunoglobulin-associated beta (CD79B), transcript variant 3, mRNA [NM_001039933]                         | 9.246 | up | 819 |
| A_33_P3383970  | TLR10          | Homo sapiens toll-like receptor 10 (TLR10), transcript variant 1, mRNA [NM_030956]                                                     | 5.577 | up | 820 |
| A_33_P3264846  | SAMD9L         | sterile alpha motif domain containing 9-like [Source:HGNC Symbol;Acc:HGNC:1349] [ENST00000610760]                                      | 7.353 | up | 821 |
| A_23_P145874   | SAMD9L         | sterile alpha motif domain containing 9-like [Source:HGNC Symbol;Acc:HGNC:1349] [ENST00000411955]                                      | 6.081 | up | 822 |
| A_23_P42080    | TMEM14A        | Homo sapiens transmembrane protein 14A (TMEM14A), mRNA [NM_014051]                                                                     | 4.647 | up | 823 |
| A_24_P277155   | HLTF           | Homo sapiens helicase-like transcription factor (HLTF), transcript variant 1, mRNA [NM_003071]                                         | 3.575 | up | 824 |
| A_23_P88222    | PLD4           | Homo sapiens phospholipase D family, member 4 (PLD4), mRNA [NM_138790]                                                                 | 8.007 | up | 825 |
| A_23_P342131   | CYB561A3       | Homo sapiens cytochrome b561 family, member A3 (CYB561A3), transcript variant 2, mRNA [NM_153611]                                      | 3.550 | up | 826 |

|                |                |                                                                                                                                                                |        |    |     |
|----------------|----------------|----------------------------------------------------------------------------------------------------------------------------------------------------------------|--------|----|-----|
| A_23_P16078    | PAFAH1B3       | Homo sapiens platelet-activating factor acetylhydrolase 1b, catalytic subunit 3 (29kDa) (PAFAH1B3), transcript variant 2, mRNA [NM_002573]                     | 3.412  | up | 827 |
| A_33_P3372451  | DNPH1          | Homo sapiens 2'-deoxynucleoside 5'-phosphate N-hydrolase 1 (DNPH1), transcript variant 2, mRNA [NM_199184]                                                     | 4.573  | up | 828 |
| A_33_P3258712  | LOC101928000   | PREDICTED: Homo sapiens uncharacterized LOC101928000 (LOC101928000), ncRNA [XR_243583]                                                                         | 3.267  | up | 829 |
| A_33_P3304824  | LINC00618      | Homo sapiens long intergenic non-protein coding RNA 618 (LINC00618), long non-coding RNA [NR_104113]                                                           | 3.328  | up | 830 |
| A_19_P00320722 | SRP14-AS1      | Homo sapiens SRP14 antisense RNA1 (head to head) (SRP14-AS1), transcript variant 1, long non-coding RNA [NR_040059]                                            | 8.796  | up | 831 |
| A_23_P66311    | DNASE1         | Homo sapiens deoxyribonuclease I (DNASE1), mRNA [NM_005223]                                                                                                    | 3.954  | up | 832 |
| A_24_P296907   | THAP8          | Homo sapiens THAP domain containing 8 (THAP8), mRNA [NM_152658]                                                                                                | 5.831  | up | 833 |
| A_24_P925314   | GM2A           | Homo sapiens GM2 ganglioside activator (GM2A), transcript variant 1, mRNA [NM_000405]                                                                          | 3.427  | up | 834 |
| A_23_P129064   | GATM           | Homo sapiens glycine amidinotransferase (L-arginine:glycine amidinotransferase) (GATM), mRNA [NM_001482]                                                       | 3.217  | up | 835 |
| A_24_P417352   | LOC102725284   | immunoglobulin heavy constant mu [Source:HGNC Symbol;Acc:HGNC:5541] [ENST00000610838]                                                                          | 3.287  | up | 836 |
| A_33_P3263317  | na             | Homo sapiens cDNA FU46564 fis, clone THYMU3040746, highly similar to Ig gamma-2 chain C region. [AK128421]                                                     | 3.711  | up | 837 |
| A_24_P276576   | FCRLA          | Homo sapiens Fc receptor-like A (FCRLA), transcript variant 2, mRNA [NM_032738]                                                                                | 15.711 | up | 838 |
| A_23_P46039    | FCRLA          | Homo sapiens Fc receptor-like A (FCRLA), transcript variant 2, mRNA [NM_032738]                                                                                | 14.672 | up | 839 |
| A_23_P217901   | TSTD1          | Homo sapiens thiosulfate sulfurtransferase (rhodanese)-like domain containing 1 (TSTD1), transcript variant 1, mRNA [NM_001113207]                             | 4.731  | up | 840 |
| A_23_P30736    | HLA-DOB        | Homo sapiens major histocompatibility complex, class II, DO beta (HLA-DOB), mRNA [NM_002120]                                                                   | 4.305  | up | 841 |
| A_33_P3397910  | lnc-RAB1A-1    | ALU1_HUMAN (P39188) Alu subfamily J sequence contamination warning entry, partial (5%) [THC2680929]                                                            | 3.461  | up | 842 |
| A_23_P49988    | KRTAP4-2       | Homo sapiens keratin associated protein 4-2 (KRTAP4-2), mRNA [NM_033062]                                                                                       | 3.223  | up | 843 |
| A_21_P0002860  | na             | 0                                                                                                                                                              | 3.501  | up | 844 |
| A_33_P3565787  | PSMG3-AS1      | Homo sapiens PSMG3 antisense RNA 1 (head to head) (PSMG3-AS1), transcript variant 1, long non-coding RNA [NR_027329]                                           | 3.163  | up | 845 |
| A_23_P208961   | MUM1           | Homo sapiens melanoma associated antigen (mutated) 1 (MUM1), transcript variant 1, mRNA [NM_032853]                                                            | 4.407  | up | 846 |
| A_23_P86731    | ZNF239         | Homo sapiens zinc finger protein 239 (ZNF239), transcript variant 1, mRNA [NM_005674]                                                                          | 7.140  | up | 847 |
| A_32_P24140    | GAS2           | Homo sapiens growth arrest-specific 2 (GAS2), transcript variant 1, mRNA [NM_005256]                                                                           | 5.144  | up | 848 |
| A_33_P3371341  | FAM66C         | Homo sapiens family with sequence similarity 66, member C (FAM66C), long non-coding RNA [NR_026788]                                                            | 4.237  | up | 849 |
| A_33_P3238295  | FAM66C         | Homo sapiens family with sequence similarity 66, member C (FAM66C), long non-coding RNA [NR_026788]                                                            | 3.833  | up | 850 |
| A_21_P0000742  | MYLK-AS1       | Homo sapiens MYLK antisense RNA 1 (MYLK-AS1), transcript variant 1, long non-coding RNA [NR_038266]                                                            | 5.233  | up | 851 |
| A_33_P3271395  | LOC100129534   | Homo sapiens small nuclear ribonucleoprotein polypeptide N pseudogene (LOC100129534), non-coding RNA [NR_024489]                                               | 5.804  | up | 852 |
| A_23_P92629    | CWC27          | Homo sapiens CWC27 spliceosome-associated protein homolog (S. cerevisiae) (CWC27), transcript variant 1, mRNA [NM_005869]                                      | 4.689  | up | 853 |
| A_23_P147605   | C11orf49       | Homo sapiens chromosome 11 open reading frame 49 (C11orf49), transcript variant 1, mRNA [NM_001003676]                                                         | 3.538  | up | 854 |
| A_33_P3252369  | TMEM182        | Homo sapiens transmembrane protein 182 (TMEM182), mRNA [NM_144632]                                                                                             | 7.132  | up | 855 |
| A_24_P268729   | HEMK1          | Homo sapiens HemK methyltransferase family member 1 (HEMK1), mRNA [NM_016173]                                                                                  | 6.326  | up | 856 |
| A_23_P256835   | TRAPPC12       | Homo sapiens trafficking protein particle complex 12 (TRAPPC12), mRNA [NM_016030]                                                                              | 3.259  | up | 857 |
| A_23_P420256   | C2orf43        | Homo sapiens chromosome 2 open reading frame 43 (C2orf43), transcript variant 1, mRNA [NM_021925]                                                              | 8.585  | up | 858 |
| A_24_P914513   | BCKDHB         | Homo sapiens branched chain keto acid dehydrogenase E1, beta polypeptide (BCKDHB), transcript variant 1, mRNA [NM_183050]                                      | 4.744  | up | 859 |
| A_33_P3389298  | ZNF30          | Homo sapiens zinc finger protein 30 (ZNF30), transcript variant 1, mRNA [NM_001099438]                                                                         | 5.286  | up | 860 |
| A_32_P151782   | na             | AGENCOURT_14064404 NIH_MGC_172 Homo sapiens cDNA 5', mRNA sequence [CD248433]                                                                                  | 6.827  | up | 861 |
| A_23_P39517    | SRBD1          | Homo sapiens S1 RNA binding domain 1 (SRBD1), mRNA [NM_018079]                                                                                                 | 3.404  | up | 862 |
| A_24_P626931   | UBE3D          | ubiquitin protein ligase E3D [Source:HGNC Symbol;Acc:HGNC:21381] [ENST00000503942]                                                                             | 4.684  | up | 863 |
| A_21_P0011592  | LINC00910      | Homo sapiens long intergenic non-protein coding RNA 910 (LINC00910), transcript variant 2, long non-coding RNA [NR_027412]                                     | 4.756  | up | 864 |
| A_21_P0012925  | XLOC_I2_012210 | BROAD Institute lincRNA (XLOC_I2_012210), lincRNA [TCONS_I2_00023087]                                                                                          | 3.984  | up | 865 |
| A_24_P299355   | GRAPL          | Homo sapiens GRB2-related adaptor protein-like (GRAPL), mRNA [NM_001129778]                                                                                    | 6.365  | up | 866 |
| A_23_P23719    | VPS45          | Homo sapiens vacuolar protein sorting 45 homolog (S. cerevisiae) (VPS45), transcript variant 1, mRNA [NM_007259]                                               | 3.127  | up | 867 |
| A_32_P133670   | ANP32A         | Homo sapiens acidic (leucine-rich) nuclear phosphoprotein 32 family, member A (ANP32A), mRNA [NM_006305]                                                       | 3.143  | up | 868 |
| A_33_P3275510  | C20orf196      | chromosome 20 open reading frame 196 [Source:HGNC Symbol;Acc:HGNC:26318] [ENST00000303142]                                                                     | 3.460  | up | 869 |
| A_21_P0007119  | FLJ37035       | Homo sapiens uncharacterized LOC399821 (FLJ37035), long non-coding RNA [NR_033847]                                                                             | 3.456  | up | 870 |
| A_23_P86100    | KLHDC9         | Homo sapiens kelch domain containing 9 (KLHDC9), transcript variant 2, mRNA [NM_001007255]                                                                     | 4.806  | up | 871 |
| A_33_P3304963  | LRRC27         | Homo sapiens leucine rich repeat containing 27 (LRRC27), transcript variant 4, mRNA [NM_001143759]                                                             | 4.508  | up | 872 |
| A_23_P123086   | PSMG3-AS1      | Homo sapiens PSMG3 antisense RNA 1 (head to head) (PSMG3-AS1), transcript variant 1, long non-coding RNA [NR_027329]                                           | 4.243  | up | 873 |
| A_24_P254551   | ARHGEF9        | Homo sapiens Cdc42 guanine nucleotide exchange factor (GEF) 9 (ARHGEF9), transcript variant 1, mRNA [NM_015185]                                                | 5.116  | up | 874 |
| A_23_P315206   | CCBL1          | Homo sapiens cysteine conjugate-beta lyase, cytoplasmic (CCBL1), transcript variant 1, mRNA [NM_004059]                                                        | 6.120  | up | 875 |
| A_24_P398323   | TRIM34         | Homo sapiens tripartite motif containing 34 (TRIM34), transcript variant 4, mRNA [NM_001003827]                                                                | 3.971  | up | 876 |
| A_24_P573533   | CBWD5          | Homo sapiens COBW domain containing 5 (CBWD5), transcript variant 1, mRNA [NM_001024916]                                                                       | 3.310  | up | 877 |
| A_24_P100830   | AMN1           | Homo sapiens antagonist of mitotic exit network 1 homolog (S. cerevisiae) (AMN1), transcript variant 3, mRNA [NM_001278412]                                    | 3.439  | up | 878 |
| A_21_P0014380  | na             | PREDICTED: Homo sapiens uncharacterized LOC100507486 (LOC100507486), misc_RNA [XR_109525]                                                                      | 3.584  | up | 879 |
| A_33_P3405743  | CRYZ           | Homo sapiens crystallin, zeta (quinone reductase) (CRYZ), transcript variant 1, mRNA [NM_001130042]                                                            | 3.885  | up | 880 |
| A_33_P3233273  | LRRC61         | Homo sapiens leucine rich repeat containing 61 (LRRC61), transcript variant 1, mRNA [NM_001142928]                                                             | 3.951  | up | 881 |
| A_23_P320717   | COG4           | Homo sapiens component of oligomeric golgi complex 4 (COG4), transcript variant 1, mRNA [NM_015386]                                                            | 3.166  | up | 882 |
| A_33_P3277514  | BTK            | Homo sapiens Bruton agammaglobulinemia tyrosine kinase (BTK), transcript variant 3, mRNA [NM_001287344]                                                        | 3.806  | up | 883 |
| A_23_P137139   | BTK            | Homo sapiens Bruton agammaglobulinemia tyrosine kinase (BTK), transcript variant 1, mRNA [NM_000061]                                                           | 3.916  | up | 884 |
| A_33_P3531828  | LARS           | Homo sapiens leucyl-tRNA synthetase (LARS), mRNA [NM_020117]                                                                                                   | 3.856  | up | 885 |
| A_33_P3217834  | SMARCAL1       | Homo sapiens SWI/SNF related, matrix associated, actin dependent regulator of chromatin, subfamily a-like 1 (SMARCAL1), transcript variant 1, mRNA [NM_014140] | 4.416  | up | 886 |

|               |                |                                                                                                                                         |       |    |     |
|---------------|----------------|-----------------------------------------------------------------------------------------------------------------------------------------|-------|----|-----|
| A_23_P96761   | ACADM          | Homo sapiens acyl-CoA dehydrogenase, C-4 to C-12 straight chain (ACADM), transcript variant 1, mRNA [NM_000016]                         | 6.941 | up | 887 |
| A_23_P332042  | RECQL5         | Homo sapiens RecQ protein-like 5 (RECQL5), transcript variant 1, mRNA [NM_004259]                                                       | 3.990 | up | 888 |
| A_33_P3210521 | C2orf43        | Homo sapiens chromosome 2 open reading frame 43 (C2orf43), transcript variant 1, mRNA [NM_021925]                                       | 6.877 | up | 889 |
| A_23_P118406  | C17orf62       | Homo sapiens chromosome 17 open reading frame 62 (C17orf62), transcript variant 2, mRNA [NM_001033046]                                  | 3.389 | up | 890 |
| A_23_P358470  | PRIMPOL        | Homo sapiens primase and polymerase (DNA-directed) (PRIMPOL), transcript variant 1, mRNA [NM_152683]                                    | 3.368 | up | 891 |
| A_23_P90333   | ZNF404         | Homo sapiens zinc finger protein 404 (ZNF404), mRNA [NM_001033719]                                                                      | 7.140 | up | 892 |
| A_23_P84922   | HDAC8          | Homo sapiens histone deacetylase 8 (HDAC8), transcript variant 1, mRNA [NM_018486]                                                      | 3.149 | up | 893 |
| A_33_P3235987 | PIN4           | Homo sapiens protein (peptidylprolyl cis/trans isomerase) NIMA-interacting, 4 (parvulin) (PIN4), transcript variant 1, mRNA [NM_006223] | 3.296 | up | 894 |
| A_24_P207139  | PML            | Homo sapiens promyelocytic leukemia (PML), transcript variant 1, mRNA [NM_033238]                                                       | 3.845 | up | 895 |
| A_23_P300076  | IQCG           | Homo sapiens IQ motif containing G (IQCG), transcript variant 1, mRNA [NM_032263]                                                       | 3.837 | up | 896 |
| A_23_P215070  | CEP41          | Homo sapiens centrosomal protein 41kDa (CEP41), transcript variant 1, mRNA [NM_018718]                                                  | 5.563 | up | 897 |
| A_23_P23102   | ZSCAN20        | Homo sapiens zinc finger and SCAN domain containing 20 (ZSCAN20), mRNA [NM_145238]                                                      | 3.825 | up | 898 |
| A_23_P92954   | HSD17B4        | Homo sapiens hydroxysteroid (17-beta) dehydrogenase 4 (HSD17B4), transcript variant 2, mRNA [NM_000414]                                 | 3.112 | up | 899 |
| A_23_P353717  | RMI2           | Homo sapiens RecQ mediated genome instability 2 (RMI2), mRNA [NM_152308]                                                                | 4.385 | up | 900 |
| A_32_P96692   | POLH           | Homo sapiens polymerase (DNA directed), eta (POLH), transcript variant 1, mRNA [NM_006502]                                              | 3.993 | up | 901 |
| A_33_P3313830 | LINC01184      | Homo sapiens long intergenic non-protein coding RNA 1184 (LINC01184), long non-coding RNA [NR_015360]                                   | 3.709 | up | 902 |
| A_21_P0000799 | RNASEH1-AS1    | Homo sapiens RNASEH1 antisense RNA 1 (RNASEH1-AS1), transcript variant 1, long non-coding RNA [NR_038430]                               | 3.340 | up | 903 |
| A_21_P0000800 | RNASEH1-AS1    | Homo sapiens RNASEH1 antisense RNA 1 (RNASEH1-AS1), transcript variant 3, long non-coding RNA [NR_038431]                               | 3.252 | up | 904 |
| A_24_P162287  | CEP250         | Homo sapiens centrosomal protein 250kDa (CEP250), mRNA [NM_007186]                                                                      | 3.166 | up | 905 |
| A_23_P129014  | EFCAB11        | Homo sapiens EF-hand calcium binding domain 11 (EFCAB11), transcript variant 1, mRNA [NM_145231]                                        | 5.168 | up | 906 |
| A_21_P0010470 | lnc-MAPK8IP2-1 | LCNPedia lincRNA (lnc-MAPK8IP2-1), lincRNA [lnc-MAPK8IP2-1:12]                                                                          | 3.256 | up | 907 |
| A_21_P0014568 | LOC100507616   | PREDICTED: Homo sapiens uncharacterized LOC100507616 (LOC100507616), transcript variant X1, ncRNA [XR_110328]                           | 3.421 | up | 908 |
| A_33_P3407895 | RINL           | Homo sapiens Ras and Rab interactor-like (RINL), transcript variant 1, mRNA [NM_001195833]                                              | 3.469 | up | 909 |
| A_23_P357104  | ANXA6          | Homo sapiens annexin A6 (ANXA6), transcript variant 1, mRNA [NM_001155]                                                                 | 4.033 | up | 910 |
| A_23_P163143  | ACYP1          | Homo sapiens acylphosphatase 1, erythrocyte (common) type (ACYP1), transcript variant 4, mRNA [NM_001302617]                            | 5.273 | up | 911 |
| A_23_P334218  | TBC1D31        | Homo sapiens TBC1 domain family, member 31 (TBC1D31), transcript variant 1, mRNA [NM_145647]                                            | 3.718 | up | 912 |
| A_24_P14260   | CARD8          | Homo sapiens caspase recruitment domain family, member 8 (CARD8), transcript variant 2, mRNA [NM_014959]                                | 3.186 | up | 913 |
| A_23_P58036   | MCCC1          | Homo sapiens methylcrotonoyl-CoA carboxylase 1 (alpha) (MCCC1), transcript variant 1, mRNA [NM_020166]                                  | 3.951 | up | 914 |
| A_23_P155477  | C3orf18        | Homo sapiens chromosome 3 open reading frame 18 (C3orf18), transcript variant 1, mRNA [NM_016210]                                       | 4.289 | up | 915 |
| A_23_P415021  | METTL7A        | Homo sapiens methyltransferase like 7A (METTL7A), mRNA [NM_014033]                                                                      | 5.115 | up | 916 |
| A_23_P200838  | KMO            | Homo sapiens kynurenine 3-monooxygenase (kynurenine 3-hydroxylase) (KMO), mRNA [NM_003679]                                              | 3.159 | up | 917 |
| A_24_P77082   | KMO            | Homo sapiens kynurenine 3-monooxygenase (kynurenine 3-hydroxylase) (KMO), mRNA [NM_003679]                                              | 4.662 | up | 918 |
| A_24_P175612  | SFXN2          | Homo sapiens sideroflexin 2 (SFXN2), mRNA [NM_178858]                                                                                   | 3.242 | up | 919 |
| A_33_P3401647 | PPP1R14A       | Homo sapiens protein phosphatase 1, regulatory (inhibitor) subunit 14A (PPP1R14A), transcript variant 1, mRNA [NM_033256]               | 7.542 | up | 920 |
| A_33_P3416712 | LOC400958      | Homo sapiens uncharacterized LOC400958 (LOC400958), long non-coding RNA [NR_036586]                                                     | 5.611 | up | 921 |
| A_23_P65983   | CCDC102A       | Homo sapiens coiled-coil domain containing 102A (CCDC102A), mRNA [NM_033212]                                                            | 3.513 | up | 922 |

Differentially expressed genes were assessed by Moderated T-Test (see Supplemental Methods).

**Table S4. Pathway and GO categories differentially represented in BCRlow and BCRhigh MCL cells**

| <b>Rank</b> | <b>Function Name</b>                  | <b>Number of<br/>genes/pathway</b> | <b>P</b> | <b>Impact Factor</b> |
|-------------|---------------------------------------|------------------------------------|----------|----------------------|
| 1           | Antigen processing and presentation   | 5                                  | 0.03739  | 82.185               |
| 2           | Phosphatidylinositol signaling system | 6                                  | 0.00813  | 22.084               |
| 3           | Adherens junction                     | 5                                  | 0.03085  | 18.065               |
| 4           | B cell receptor signaling pathway     | 10                                 | 0.00000  | 15.474               |
| 5           | Regulation of actin cytoskeleton      | 11                                 | 0.01035  | 6.809                |
| 6           | Fc epsilon RI signaling pathway       | 6                                  | 0.00866  | 6.569                |
| 7           | Melanoma                              | 6                                  | 0.00625  | 6.442                |
| 8           | Cell adhesion molecules (CAMs)        | 7                                  | 0.03665  | 5.913                |
| 9           | Colorectal cancer                     | 6                                  | 0.01379  | 5.827                |
| 10          | Acute myeloid leukemia                | 5                                  | 0.00975  | 5.813                |
| 11          | Pathways in cancer                    | 14                                 | 0.02175  | 5.456                |
| 12          | Glioma                                | 5                                  | 0.01674  | 5.44                 |
| 13          | Prostate cancer                       | 6                                  | 0.01790  | 5.344                |

Table S5. Gene Set upregulated in BCRhigh MCL cells respect to BCRlow MCL cells according to Gene Set Enrichment Analysis (GSEA)

| Gene Set Name                                              | Gene Set Size | Enrichment Score | Normalized Enrichment Score | Nominal P-Value | FDR Q-Value |
|------------------------------------------------------------|---------------|------------------|-----------------------------|-----------------|-------------|
| KLEIN_PRIMARY_EFFUSION_LYMPHOMA_DN                         | 57            | -0.64277         | -2.45527                    | 0.00000         | 0.00000     |
| GRAHAM_NORMAL QUIESCENT_VS_NORMAL_DIVIDING_DN              | 78            | -0.57130         | -2.32747                    | 0.00000         | 0.00000     |
| MOOTHA_VOXPPOS                                             | 84            | -0.55872         | -2.28949                    | 0.00000         | 0.00028     |
| BASSO_CD40_SIGNALING_DN                                    | 55            | -0.58473         | -2.25370                    | 0.00000         | 0.00021     |
| KEGG_DNA_REPLICATION                                       | 36            | -0.63488         | -2.20542                    | 0.00000         | 0.00017     |
| REACTOME_RESPIRATORY_ELECTRON_TRANSPORT_ATP_SYNTHESIS_BY_C |               |                  |                             |                 |             |
| HEMIOSMOTIC_COUPLING_AND_HEAT_PRODUCTION_BY_UNCOUPLING_PRO | 91            | -0.52801         | -2.18743                    | 0.00000         | 0.00014     |
| TEINS                                                      |               |                  |                             |                 |             |
| YU_MYC_TARGETS_DN                                          | 48            | -0.58498         | -2.17545                    | 0.00000         | 0.00012     |
| KANG_DOXORUBICIN_RESISTANCE_UP                             | 49            | -0.59507         | -2.15912                    | 0.00000         | 0.00031     |
| PYEON_HPV_POSITIVE_TUMORS_UP                               | 84            | -0.51976         | -2.13562                    | 0.00000         | 0.00047     |
| REACTOME_RESPIRATORY_ELECTRON_TRANSPORT                    | 74            | -0.53031         | -2.12988                    | 0.00000         | 0.00051     |
| SANA_RESPONSE_TO_IFNG_UP                                   | 64            | -0.54144         | -2.10834                    | 0.00000         | 0.00070     |
| KEGG_VALINE_LEUCINE_AND_ISOLEUCINE_DEGRADATION             | 41            | -0.57968         | -2.09385                    | 0.00000         | 0.00079     |
| REACTOME_TELOMERE_MAINTENANCE                              | 72            | -0.51982         | -2.08997                    | 0.00000         | 0.00073     |
| ISHIDA_E2F_TARGETS                                         | 47            | -0.56699         | -2.08842                    | 0.00000         | 0.00067     |
| CROONQUIST_IL6_DEPRIVATION_DN                              | 90            | -0.49985         | -2.08417                    | 0.00000         | 0.00069     |
| REN_BOUND_BY_E2F                                           | 58            | -0.52731         | -2.05434                    | 0.00000         | 0.00107     |
| ZHAN_MULTIPLE_MYELOMA_CD1_VS_CD2_DN                        | 41            | -0.55371         | -2.00415                    | 0.00000         | 0.00261     |
| WAKASUGI_HAVE_ZNF143_BINDING_SITES                         | 57            | -0.52023         | -2.00376                    | 0.00159         | 0.00247     |
| WIELAND_UP_BY_HBV_INFECTION                                | 93            | -0.48095         | -2.00256                    | 0.00000         | 0.00234     |
| REACTOME_DNA_REPAIR                                        | 100           | -0.48007         | -1.98779                    | 0.00000         | 0.00265     |
| WOO_LIVER_CANCER_RECURRENCE_DN                             | 55            | -0.52017         | -1.97602                    | 0.00000         | 0.00297     |
| KAUFFMANN_MELANOMA_RELAPSE_UP                              | 57            | -0.51877         | -1.97578                    | 0.00000         | 0.00283     |
| REACTOME_G2_M_CHECKPOINTS                                  | 39            | -0.55443         | -1.97193                    | 0.00000         | 0.00297     |
| KEGG_PEROXISOME                                            | 61            | -0.49775         | -1.95369                    | 0.00000         | 0.00373     |
| KEGG_PYRIMIDINE_METABOLISM                                 | 86            | -0.47361         | -1.95241                    | 0.00000         | 0.00369     |
| KEGG_ANTIGEN_PROCESSING_AND_PRESENTATION                   | 67            | -0.49561         | -1.95205                    | 0.00000         | 0.00354     |
| ZHANG_TLX_TARGETS_UP                                       | 79            | -0.48407         | -1.94407                    | 0.00000         | 0.00398     |
| SLEBOS_HEAD_AND_NECK_CANCER_WITH_HPV_UP                    | 69            | -0.48185         | -1.92280                    | 0.00000         | 0.00554     |
| MORI_LARGE_PRE_BII_LYMPHOCYTE_DN                           | 56            | -0.50942         | -1.91841                    | 0.00000         | 0.00570     |
| KEGG_TYPE_I_DIABETES_MELLITUS                              | 36            | -0.54784         | -1.91498                    | 0.00000         | 0.00560     |
| BURTON_ADIPOGENESIS_3                                      | 89            | -0.45991         | -1.91036                    | 0.00000         | 0.00572     |
| RICKMAN_TUMOR_DIFFERENTIATED_WELL_VS_MODERATELY_UP         | 86            | -0.45730         | -1.90216                    | 0.00161         | 0.00621     |
| REACTOME_TRANSCRIPTION_COUPLED_NER_TC_NER                  | 42            | -0.52377         | -1.90046                    | 0.00000         | 0.00613     |
| LEE_EARLY_T_LYMPHOCYTE_UP                                  | 81            | -0.46723         | -1.89848                    | 0.00000         | 0.00615     |
| ZHOU_CELL_CYCLE_GENES_IN_IR_RESPONSE_6HR                   | 70            | -0.47887         | -1.89808                    | 0.00000         | 0.00600     |
| MORI_EMU_MYC_LYMPHOMA_BY_ONSET_TIME_UP                     | 100           | -0.45255         | -1.89449                    | 0.00000         | 0.00614     |
| SIG_BCR_SIGNALING_PATHWAY                                  | 46            | -0.50867         | -1.87878                    | 0.00000         | 0.00725     |
| FRASOR_RESPONSE_TO_SERM_OR_FULVESTRANT_DN                  | 47            | -0.51505         | -1.87696                    | 0.00000         | 0.00721     |
| VERNELL_RETINOBLASTOMA_PATHWAY_UP                          | 64            | -0.48012         | -1.87643                    | 0.00164         | 0.00716     |
| SONG_TARGETS_OF_IE86_CMV_PROTEIN                           | 60            | -0.48315         | -1.87443                    | 0.00000         | 0.00722     |
| KEGG_NUCLEOTIDE_EXCISION_REPAIR                            | 43            | -0.51015         | -1.87328                    | 0.00164         | 0.00719     |
| CROONQUIST_NRAS_SIGNALING_DN                               | 66            | -0.47718         | -1.87134                    | 0.00000         | 0.00724     |
| RAMALHO_STEMNESS_DN                                        | 61            | -0.48163         | -1.87126                    | 0.00000         | 0.00709     |
| GRADE_METASTASIS_DN                                        | 42            | -0.51037         | -1.86763                    | 0.00332         | 0.00730     |
| PRAMOONJAGO_SOX4_TARGETS_DN                                | 44            | -0.51644         | -1.86716                    | 0.00000         | 0.00715     |
| STAMBOLSKY_TARGETS_OF_MUTATED_TP53_DN                      | 39            | -0.52469         | -1.85699                    | 0.00000         | 0.00789     |
| WINTER_HYPOXIA_DN                                          | 45            | -0.50350         | -1.85265                    | 0.00000         | 0.00812     |
| KLEIN_TARGETS_OF_BCR_ABL1_FUSION                           | 39            | -0.51916         | -1.84838                    | 0.00000         | 0.00834     |
| WU_APOPTOSIS_BY_CDKN1A_VIA_TP53                            | 46            | -0.50415         | -1.84734                    | 0.00000         | 0.00822     |
| REACTOME_MEIOTIC_RECOMBINATION                             | 72            | -0.46258         | -1.84729                    | 0.00000         | 0.00806     |
| REACTOME_DEPOSITION_OF_NEW_CENPA_CONTAINING_NUCLEOSOMES_AT |               |                  |                             |                 |             |
| _THE_CENTROMERE                                            | 57            | -0.48821         | -1.84263                    | 0.00163         | 0.00842     |
| GARGALOVIC_RESPONSE_TO_OXIDIZED_PHOSPHOLIPIDS_TURQUOISE_DN | 46            | -0.51149         | -1.84091                    | 0.00000         | 0.00834     |
| FLECHNER_BIOPSY_KIDNEY_TRANSPLANT_REJECTED_VS_OK_UP        | 80            | -0.45159         | -1.83489                    | 0.00000         | 0.00875     |
| WUNDER_INFLAMMATORY_RESPONSE_AND_CHOLESTEROL_UP            | 48            | -0.49467         | -1.82950                    | 0.00000         | 0.00912     |
| BROWNE_INTERFERON_RESPONSIVE_GENES                         | 61            | -0.46999         | -1.82879                    | 0.00000         | 0.00900     |
| GRABARCZYK_BCL11B_TARGETS_DN                               | 41            | -0.51471         | -1.82742                    | 0.00169         | 0.00889     |
| JAIN_NFKB_SIGNALING                                        | 72            | -0.45657         | -1.82466                    | 0.00000         | 0.00911     |
| MARTINEZ_RESPONSE_TO TRABECTEDIN                           | 45            | -0.49161         | -1.82280                    | 0.00165         | 0.00915     |
| KIM_GERMINAL_CENTER_T_HELPER_UP                            | 54            | -0.47593         | -1.80912                    | 0.00165         | 0.01068     |
| REACTOME_NUCLEOTIDE_EXCISION_REPAIR                        | 47            | -0.48685         | -1.79712                    | 0.00168         | 0.01224     |
| MORI_IMMATURE_B_LYMPHOCYTE_UP                              | 50            | -0.48321         | -1.79501                    | 0.00491         | 0.01236     |
| HUTTMANN_B_CLL_POOR_SURVIVAL_DN                            | 50            | -0.47818         | -1.76558                    | 0.00000         | 0.01688     |
| KEGG_B_CELL_RECEPTOR_SIGNALING_PATHWAY                     | 71            | -0.44228         | -1.76109                    | 0.00159         | 0.01771     |
| PID_FANCONI_PATHWAY                                        | 45            | -0.48904         | -1.75872                    | 0.00325         | 0.01799     |
| JIANG_AGING_HYPOTHALAMUS_UP                                | 43            | -0.49043         | -1.75646                    | 0.00165         | 0.01819     |
| CHICAS_RB1_TARGETS_LOW_SERUM                               | 85            | -0.41979         | -1.74780                    | 0.00000         | 0.01964     |
| ZHONG_RESPONSE_TO_AZACITIDINE_AND_TSA_DN                   | 61            | -0.44533         | -1.74122                    | 0.00320         | 0.02091     |
| REACTOME_SYNTHESIS_OF_DNA                                  | 88            | -0.42086         | -1.73437                    | 0.00157         | 0.02225     |
| KEGG_INTESTINAL_IMMUNE_NETWORK_FOR_IGA_PRODUCTION          | 42            | -0.47820         | -1.72246                    | 0.00162         | 0.02495     |
| GRAHAM_CML QUIESCENT_VS_NORMAL QUIESCENT_UP                | 70            | -0.43364         | -1.71998                    | 0.00000         | 0.02516     |
| GAVIN_FOXP3_TARGETS_CLUSTER_P6                             | 74            | -0.43022         | -1.71931                    | 0.00324         | 0.02494     |
| COATES_MACROPHAGE_M1_VS_M2_UP                              | 64            | -0.44386         | -1.71656                    | 0.00162         | 0.02543     |
| KESHELAVA_MULTIPLE_DRUG_RESISTANCE                         | 72            | -0.42945         | -1.71176                    | 0.00318         | 0.02660     |
| BURTON_ADIPOGENESIS_PEAK_AT_16HR                           | 40            | -0.48610         | -1.68823                    | 0.00498         | 0.03372     |
| HOWLIN_PUBERTAL_MAMMARY_GLAND                              | 46            | -0.46024         | -1.68665                    | 0.00796         | 0.03382     |
| REACTOME_TRNA_AMINOACYLATION                               | 41            | -0.46911         | -1.67962                    | 0.00659         | 0.03592     |
| PID_BCR_5PATHWAY                                           | 64            | -0.42934         | -1.65977                    | 0.00161         | 0.04395     |
| OXFORD_RALA_OR_RALB_TARGETS_UP                             | 46            | -0.44430         | -1.65210                    | 0.00663         | 0.04706     |
| ROSS_AML_WITH_MLL_FUSIONS                                  | 66            | -0.41646         | -1.64851                    | 0.00000         | 0.04830     |
| SIG_PIP3_SIGNALING_IN_B_LYMPHOCYTES                        | 35            | -0.48680         | -1.64517                    | 0.00336         | 0.04936     |

Table S6. qRT-PCR details

| Gene name     | SEQUENCE PRIMER 1      | SEQUENCE PRIMER 2      | SEQUENCE PROBE                           | Amplicon length | ID                 | R <sup>2</sup> | Slope |
|---------------|------------------------|------------------------|------------------------------------------|-----------------|--------------------|----------------|-------|
| <b>AKT3</b>   | GCTTGTACCTCCTTTAAACCTC | CATGCAGTCCATACCATCCTC  | TGAGACAGATACTAGATATTTTGGATGAAGAATTTACAGC | 130             | Hs.PT.58.38907880  | 0.998          | 3.308 |
| <b>B2M</b>    | CCTGAATCTTTGGAGTACGCT  | GGCATTCTGAAGCTGACA     | CTAAGGCCACGGAGCGAGACATC                  | 118             | B2M                | 0.997          | 3.280 |
| <b>BTK</b>    | TGTATAGCAAGTTCAGCAGCAA | ATCTCTCATATGGCATCTTCCC | CCCACATCAAACCCCAAAGCCC                   | 93              | Hs.PT.56a.38768830 | 0.996          | 3.323 |
| <b>CD79b</b>  | CAGCTGAGCCAGTACCAG     | TGTGCCAAGGTGCTGAATC    | 5'AGCCAGATCGGAGGACCCGG                   | 73              | Hs.PT.58.40462637  | 0.996          | 3.390 |
| <b>PIK3CD</b> | TGCTCAAAGACATCCAGTATC  | GGCTTCGTTAAACTTCACTCG  | TCTGTTTTCCCAAGTCCAGGG                    | 96              | Hs.PT.58.39393086  | 0.984          | 3.377 |
| <b>SYK</b>    | CTGGAGCTTTGGAGTGTGA    | CGCTCTCCTTCTCTAACATAGC | TGCCCATAGGAGAATGCTTCCAC                  | 105             | Hs.PT.5839642284   | 0.997          | 3.346 |
| <b>BCL2</b>   | AGCCAGGAGAAATCAAACAGAG | GATGACTGAGTACCTGAACCG  | CAGGATAACGGAGGCTGGGATGC                  | 117             | Hs.PT.56a.2905156  | 0.996          | 3.301 |

Note: ID, assay name according to IDT producer; R2, correlation coefficient; Slope, slope of the standar curve.
