# Supplementary material for: A B-cell receptor-related gene signature predicts survival in mantle cell lymphoma: results from the Fondazione Italiana Linfomi MCL-0208 trial
Source: PubMed Central journal article supplement — Haematologica. 2018 Feb 22;103(5):849–56. doi: 10.3324/haematol.2017.184325 (PMC5927985; doi:10.3324/haematol.2017.184325), 2018-05
Supplement: 2017_184325-Disclosures_and_Contributions.pdf [file 2017_184325-Disclosures_and_Contributions.pdf]

Haematologica  
HAEMATOL/2017/184325  
Version 3

A B-cell receptor-related gene signature predicts survival in mantle cell lymphoma: results from the “Fondazione Italiana Linfomi” MCL-0208 trial

Riccardo Bomben, Simone Ferrero, Tiziana D'Agaro, Michele Dal Bo, Alessandro Re, Andrea Evangelista, Angelo Michele Carella, Alberto Zamò, Umberto Vitolo, Paola Omedè, Chiara Rusconi, Luca Arcaini, Luigi Rigacci, Stefano Luminari, Andrea Piccin, Delong Liu, Adrien Wiestner, Gianluca Gaidano, Sergio Cortelazzo, Marco Ladetto, and Valter Gattei

Disclosures: >Progetto Giovani Ricercatori GR-2011-02347441, GR-2009-1475467, and GR-2011-02351370, Ministero della Salute, Rome, Italy; >Progetto Ricerca Finalizzata RF-2009-1469205, and RF-2010-2307262, Ministero della Salute, Rome, Italy; >Associazione Italiana contro le Leucemie, linfomi e mielomi (AIL), Venezia Section, Pramaggiore Group, Italy; >Associazione Italiana Ricerca Cancro (AIRC), Investigator Grant IG-2015 (17622); >“5x1000 Intramural Program”, Centro di Riferimento Oncologico, Aviano, Italy; >Provincia Autonoma di Bolzano/Bozen, Italy; >A.O. S. Maurizio, Bolzano/Bozen, Italy; >Progetto di Rilevante Interesse Nazionale (PRIN2009) 7.07.02.60 AE01, Ministero Italiano dell'Università e della Ricerca (MIUR), Roma, Italy; >Fondi di Ricerca Locale, Università degli Studi di Torino, Italy; Fondazione Neoplasie Del Sangue (Fo.Ne.Sa), Torino, Italy; >CRT 2015.1044, Fondazione CRT, Torino, Italy.

Contributions: T.D.A., M.D.B., A.E., A.Z., P.O. performed research; S.F., A.R., A.M.C., U.V., C.R., L.A., L.R., S.L., A.P., D.L., A.W., G.G., S.C. and M.L. provided patients data; R.B, S.F, M.L. and V.G. designed the study and wrote the manuscript.
